# Supplementary material
Source: publisher figshare collection journal article supplement (https://acs.figshare.com/ndownloader/files/7705501)
Supplement: Supplementary file 1 [file 7705501]

# Supporting Information

## Silver-Catalyzed C(sp<sup>3</sup>)-H Chlorination

Jun Ozawa and Motomu Kanai

*Graduate School of Pharmaceutical Sciences, The University of Tokyo*  
*Kanai Life Science Catalysis Project, ERATO, Japan Science Technology Agency,*  
*7-3-1, Hongo, Bunkyo-ku, Tokyo 113-0033, Japan.*

Phone: +81-3-5841-4830

Fax: +81-3-5684-5206

Email: kanai@mol.f.u-tokyo.ac.jp (Kanai)

### Contents

---

|                                                                                                    |            |
|----------------------------------------------------------------------------------------------------|------------|
| <b>1. General method.....</b>                                                                      | <b>S2</b>  |
| <b>2. Preparation of Ag(phen)<sub>2</sub>OTf .....</b>                                             | <b>S2</b>  |
| <b>3. Typical C(sp<sup>3</sup>)-H chlorination procedure .....</b>                                 | <b>S2</b>  |
| <b>4. Optimization of the reaction conditions .....</b>                                            | <b>S3</b>  |
| 4.1. Chlorination of <i>tert</i> -C(sp <sup>3</sup> )-H bonds.....                                 | S3         |
| 4.2. Chlorination of benzylic C(sp <sup>3</sup> )-H bonds.....                                     | S5         |
| <b>5. Limitation in the substrate scope .....</b>                                                  | <b>S6</b>  |
| <b>6. Chlorination of a chiral compound .....</b>                                                  | <b>S7</b>  |
| 6.1. Synthesis of <b>1w</b> from (-)-β-citronellol, and conversion of <b>2w</b> to <b>2x</b> ..... | S7         |
| 6.2. Chiral HPLC analysis of <b>2x</b> .....                                                       | S8         |
| <b>7. Procedure for free <i>tert</i>-BuO radical reactions .....</b>                               | <b>S9</b>  |
| <b>8. Synthesis of authentic samples of <b>2e</b> and <b>2j</b>.....</b>                           | <b>S9</b>  |
| 8.1. Synthesis of authentic <b>2e</b> .....                                                        | S9         |
| 8.2. Synthesis of authentic <b>2j</b> .....                                                        | S10        |
| <b>9. Analytical data.....</b>                                                                     | <b>S10</b> |
| <b>10. NMR spectra .....</b>                                                                       | <b>S22</b> |

---

## 1. General method

AgOTf, 1,10-phenanthroline, and <sup>t</sup>BuOCl were purchased from Wako Pure Chemical Industries, Ltd., Aldrich, and Tokyo Chemical Industry Co., Ltd. (TCI), respectively, which were used without any purification. NMR spectra were recorded on JEOL ECX-500 (500.16 MHz for <sup>1</sup>H NMR and 125.77 MHz for <sup>13</sup>C NMR), and JEOL ECS-400 (391.78 MHz for <sup>1</sup>H NMR, 98.52 MHz for <sup>13</sup>C NMR) spectrometers. For <sup>1</sup>H and <sup>13</sup>C NMR, chemical shifts were reported in the scale relative to the solvent used as an internal reference ( $\delta$  = 7.26 and 77.00 ppm (CDCl<sub>3</sub>), 2.04 and 29.80 ppm (acetone-*d*<sub>6</sub>), 2.50 and 39.52 ppm (DMSO-*d*<sub>6</sub>); <sup>1</sup>H and <sup>13</sup>C NMR respectively). Infrared (IR) spectra were recorded on a JASCO FT/IR 410 Fourier transform infrared spectrophotometer. ESI-MS spectra were measured on a Waters ZQ4000 spectrometer (for LRMS), and a JEOL JMS-T100LC AccuTOF spectrometer (for HRMS). Optical rotations were measured on a JASCO P-1010 polarimeter. HPLC was conducted by JASCO HPLC systems (pump: PU-2080; detector: UV-2075, measured at 254 nm). Column chromatography was performed with silica gel Merck 60 (230–400 mesh ASTM). NMR yields were calculated by <sup>1</sup>H NMR of crude products using CHCl<sub>2</sub>CHCl<sub>2</sub> ( $\delta$  = 5.9 ppm in CDCl<sub>3</sub>) as an internal standard.

## 2. Preparation of Ag(phen)<sub>2</sub>OTf<sup>1</sup>

To a stirred mixture of AgOTf (256.9 mg, 1 mmol, 1 eq) in MeOH (5 mL) was added 1,10-phenanthroline anhydrate (360.4 mg, 2 mmol, 2 eq) in MeOH (10 mL). The colorless solution turned into yellow suspension on adding a 1,10-phenanthroline solution. After stirring for three hours the solid was collected on a Kiriya filter and washed with MeOH, then dried under vacuum to give Ag(phen)<sub>2</sub>OTf (542.0 mg, 88%) as yellow solid.

**<sup>1</sup>H NMR (400 MHz, DMSO-*d*<sub>6</sub>)  $\delta$ :** 9.17 (4H, dd,  $J$  = 4.5 Hz, 1.8 Hz), 8.80 (4H, dd,  $J$  = 8.1 Hz, 1.8 Hz), 8.24 (4H, s), 8.02 (4H, dd,  $J$  = 8.1 Hz, 4.5 Hz); identical to the reported data.

## 3. Typical C(sp<sup>3</sup>)-H chlorination procedure

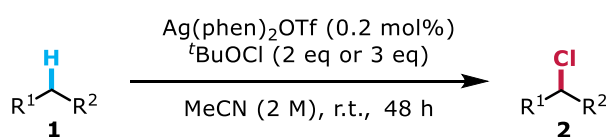

### A) 2 mmol scale reaction

To a stirred mixture of substrate **1** (2 mmol, 1 eq) and Ag(phen)<sub>2</sub>OTf (2.5 mg, 0.004 mmol, 0.2 mol%) in MeCN (1 mL, 2 M to **1**) was added <sup>t</sup>BuOCl (678.6  $\mu$ L, 6 mmol, 3 eq)\*, and then a cap was put on the flask. The color of the reaction mixture turned to brown by adding <sup>t</sup>BuOCl. After stirring for 48 hours the reaction mixture was passed through a silica gel pad in a Pasteur pipet (about 4 cm, the eluent was Et<sub>2</sub>O or EtOAc) to remove the silver catalyst and the volatiles were removed by rotavap. The residue was purified by silica gel column chromatography to obtain the chlorinated compound **2**.

\*In chlorination of a benzylic C(sp<sup>3</sup>)-H bond, we used 1) 2 eq of <sup>t</sup>BuOCl to minimize dichlorination and 2) dry MeCN, and ran the reaction under argon atmosphere to avoid S<sub>N</sub>2 substitution of Cl by H<sub>2</sub>O; otherwise

<sup>1</sup> C. Santini, C. Pettinari, G. Gioia Lobbia, D. Leonesi, G. Valle, S. Calogero *Polyhedron* **1998**, *17*, 3201–3210.

significant amounts of acetophenones were produced.

## B) 5 mmol scale reaction

The workup procedure was different from that of 2 mmol scale reaction. To a stirred reaction mixture cooled by ice bath was added NaHSO<sub>3</sub> aq and Et<sub>2</sub>O. The organic layer was separated, dried over Na<sub>2</sub>SO<sub>4</sub>, filtrated, and evaporated to give a crude mixture. The following procedure was the same as above.

## 4. Optimization of the reaction conditions

### 4.1. Chlorination of *tert*-C(sp<sup>3</sup>)-H bonds

The chlorination conditions were screened to maximize the yield using 0.2 mmol of **1a**. First, we screened catalysts (Table S1). We found that AgOTf with a bidentate ligand catalyzed the chlorination in good yield (entry 5–7). Free Ag salts didn't work well (entry 1–4), and Cu(I) and Fe(II) salts, which are catalysts for Fenton-type reactions, failed efficient chlorination, either (entry 8–11). The ligand itself was unable to be the catalyst (entry 13–15), and almost no reaction proceeded without any catalyst (entry 12). The results suggested that Ag(phen)<sub>2</sub>OTf was the best among the catalysts tested.

**Table S1 The condition screening — catalysts.**

| entry    | catalyst                            | NMR yield   | NMR rsm    |
|----------|-------------------------------------|-------------|------------|
| 1        | AgOTf                               | 12%         | 87%        |
| 2        | AgNO <sub>3</sub>                   | 7%          | 92%        |
| 3        | AgOAc                               | 8%          | 91%        |
| 4        | AgTFA                               | 16%         | 83%        |
| <b>5</b> | <b>Ag(1,10-phen)<sub>2</sub>OTf</b> | <b>76%</b>  | <b>23%</b> |
| 6        | Ag(2,2'-bpy)OTf                     | 60%         | 39%        |
| 7        | Ag(2,2'-bpy) <sub>2</sub> OTf       | 69%         | 30%        |
| 8        | CuCl (5 mol%)                       | 24%         | 75%        |
| 9        | CuCl + 1,10-phen (5+10 mol%)        | 51%         | 44%        |
| 10       | CuCl + 2,2'-bpy (5+10 mol%)         | 24%         | 74%        |
| 11       | Fe(OTf) <sub>2</sub> (5 mol%)       | < 10% (TLC) | –          |
| 12       | (none)                              | 6%          | 93%        |
| 13       | 1,10-phen (10 mol%)                 | 5%          | 94%        |
| 14       | 2,2'-bpy (10 mol%)                  | 13%         | 86%        |
| 15       | 4,4'-bpy (10 mol%)                  | 1%          | 99%        |

Next, we screened the amount of the solvent and the catalyst (Table S2). The yield did not change a lot as the concentration was changed (entry 1–4), and 2 M should be the most proper concentration. The amount of the catalyst was able to decrease as low as 0.2 mol% (entry 6). Even though higher NMR yield was obtained in entry 7, the difference in the yields is not large considering 2.5 times as much as the catalyst was used.

**Table S2 The condition screening — the amount of MeCN and Ag(phen)<sub>2</sub>OTf.**

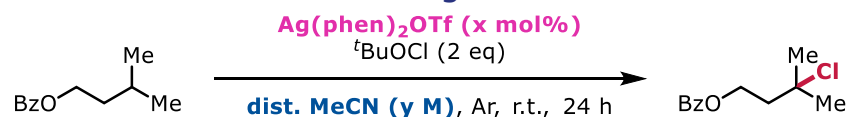

| entry    | Ag cat          | MeCN       | NMR yield  | NMR rsm    |
|----------|-----------------|------------|------------|------------|
| 1        | 1 mol%          | 0.5 M      | 66%        | 33%        |
| 2        | 1 mol%          | 1 M        | 76%        | 23%        |
| <b>3</b> | <b>1 mol%</b>   | <b>2 M</b> | <b>77%</b> | <b>22%</b> |
| 4        | 1 mol%          | 4 M        | 71%        | 28%        |
| 5        | 0.1 mol%        | 2 M        | 56%        | 43%        |
| <b>6</b> | <b>0.2 mol%</b> | <b>2 M</b> | <b>71%</b> | <b>28%</b> |
| 7        | 0.5 mol%*       | 2 M        | 74%        | 25%        |
| 8        | 1 mol%*         | 2 M        | 58%        | 41%        |
| 9        | 2 mol%*         | 2 M        | 59%        | 40%        |

\* Ag(phen)<sub>2</sub>OTf did not dissolve completely in MeCN.

Then we screened solvents and oxidants (Table S3). Ag(phen)<sub>2</sub>OTf did not dissolve well in the solvents except for MeCN and DMF, which may be one reason for the yield to be decreased by replacing MeCN with other solvents (entry 1–8). Water contamination did not affect the yield (entry 1 vs 9), so MeCN without any purification (as purchased) was chosen as the best solvent. DMSO furiously reacted with <sup>t</sup>BuOCl so that no chlorination occurred on **1a**. Other oxidants like *N*-chlorosuccinimide or aqueous NaOCl didn't promote efficient chlorination.

**Table S3 The condition screening — solvents and oxidants.**

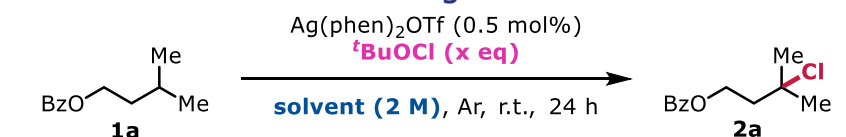

| entry                 | <sup>t</sup> BuOCl | solvent                             | NMR yield  | NMR rsm    |
|-----------------------|--------------------|-------------------------------------|------------|------------|
| <b>1</b>              | <b>2 eq</b>        | <b>dist. MeCN</b>                   | <b>78%</b> | <b>21%</b> |
| 2                     | 2 eq               | dry EtOAc                           | 50%        | 44%        |
| 3                     | 2 eq               | dry CH <sub>2</sub> Cl <sub>2</sub> | 37%        | 43%        |
| 4                     | 2 eq               | dry CHCl <sub>3</sub>               | 27%        | 58%        |
| 5                     | 2 eq               | dry <sup>t</sup> BuOH               | 49%        | 49%        |
| 6                     | 2 eq               | dry DMF                             | 0% (TLC)   | –          |
| 7                     | 2 eq               | dry DMSO                            | N.R. (TLC) | –          |
| 8                     | 2 eq               | PhCl                                | 65%        | 25%        |
| <b>9</b>              | <b>2 eq</b>        | <b>MeCN/water (1/1)</b>             | <b>79%</b> | <b>12%</b> |
| 10                    | 2 eq               | MeCN <sup>a</sup>                   | 76%        | 23%        |
| 11                    | NCS 2 eq           | MeCN <sup>a</sup>                   | N.R. (TLC) | –          |
| 12                    | NaOCl 2 eq         | MeCN <sup>a</sup>                   | 3%         | 96%        |
| 13                    | 3 eq               | MeCN <sup>a</sup>                   | 84%        | 11%        |
| 14                    | 4 eq               | MeCN <sup>a</sup>                   | 87%        | 11%        |
| 15 <sup>b</sup>       | 2 eq               | MeCN <sup>a</sup>                   | 80%        | 19%        |
| <b>16<sup>b</sup></b> | <b>3 eq</b>        | <b>MeCN<sup>a</sup></b>             | <b>92%</b> | <b>7%</b>  |

<sup>a</sup> neither distilled nor anhydrous <sup>b</sup> 48 h

Finally, we tried the chlorination under air or O<sub>2</sub> atmosphere (Table S4). Oxygen had



adverse effects on the chlorination process, but aerobic conditions were acceptable if a small reaction vessel was used.

**Table S4 Reaction atmosphere: Ar, O<sub>2</sub> or air.**

$\text{Ag(phen)}_2\text{OTf (0.5 mol\%)}$   
 $t\text{BuOCl (2 eq)}$   
**atmosphere (1 atm)**  
 $\text{MeCN (2 M}^a\text{ or 1 M}^b\text{), r.t., 24 h}$

| entry | atmosphere     | NMR yield <sup>a</sup> | NMR rsm <sup>a</sup> | NMR yield <sup>b</sup> | NMR rsm <sup>b</sup> |
|-------|----------------|------------------------|----------------------|------------------------|----------------------|
| 1     | Ar             | 79%                    | 18%                  | 79%                    | 20%                  |
| 2     | O <sub>2</sub> | 64%                    | 35%                  | 53%                    | 46%                  |
| 3     | air            | 76%                    | 23%                  | 59%                    | 40%                  |

<sup>a</sup> capped tube,  $\phi$ 16 mm  $\times$  100 mm (12.5 mL) <sup>b</sup> test tube with balloon

## 4.2. Chlorination of benzylic C(sp<sup>3</sup>)-H bonds

When the optimized conditions above were applied to benzylic C(sp<sup>3</sup>)-H chlorination, two problems arose: ketone formation and dichlorination (Scheme S1). To improve the situation, we further optimized the reaction conditions using **1h**.

**Scheme S1 Undesirable side reactions.**

### (a) ketone formation

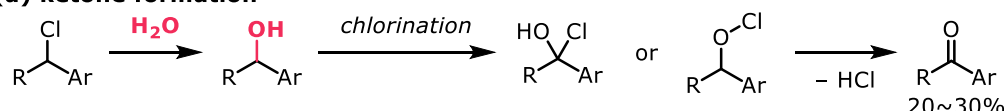

### (b) dichloride formation

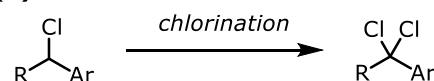

Use of dry MeCN would suppress the ketone formation, and a proper amount of *t*BuOCl would decrease the dichlorination. Table S5 shows that anhydrous conditions could suppress the ketone formation (entry 1–4). Use of smaller equivalents of the oxidant did not result in higher yield of monochloride, even though the dichlorination did decrease (entry 5–7).

**Table S5 The condition screening — benzylic C(sp<sup>3</sup>)-H chlorination.**

$\text{Ag(phen)}_2\text{OTf (0.5 mol\%)}$   
 $t\text{BuOCl (x mol\%)}$   
**dist MeCN (x M), Ar, r.t., 48 h**

| entry    | <i>t</i> BuOCl | MeCN       | NMR yield  | NMR rsm    | ketone    | dichloride |
|----------|----------------|------------|------------|------------|-----------|------------|
| 1        | 3 eq           | 0.2 M      | 63%        | 27%        | 3%        | 7%         |
| 2        | 3 eq           | 0.5 M      | 65%        | 21%        | 2%        | 11%        |
| 3        | 3 eq           | 1 M        | 67%        | 15%        | 2%        | 15%        |
| 4        | 3 eq           | 2 M        | 67%        | 10%        | 2%        | 20%        |
| 5        | 1.2 eq         | 2 M        | 53%        | 41%        | 1%        | 5%         |
| 6        | 1.5 eq         | 2 M        | 53%        | 33%        | 10%       | 3%         |
| <b>7</b> | <b>2 eq</b>    | <b>2 M</b> | <b>66%</b> | <b>19%</b> | <b>4%</b> | <b>10%</b> |

ketone

dichloride

After all we determined the optimal reaction conditions as below (Scheme S2). As there

was no problem for secondary C(sp<sup>3</sup>)-H chlorination under *tert*-C(sp<sup>3</sup>)-H chlorination conditions, no optimization was conducted further.

### Scheme S2 The optimal reaction conditions.

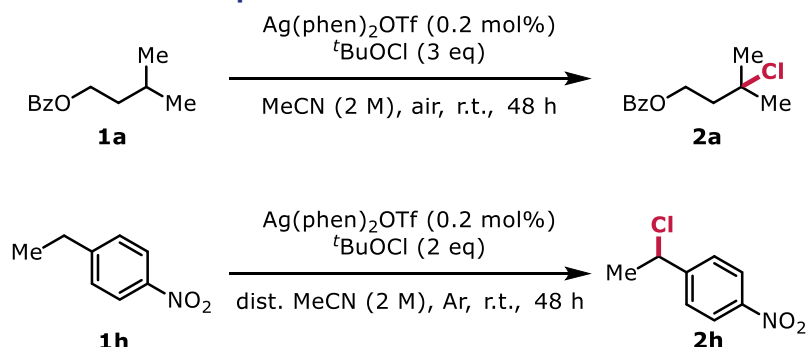

## 5. Limitation in the substrate scope

Listed below are compounds that didn't give satisfactory yields in the C(sp<sup>3</sup>)-H chlorination.

### 1. A lot of C(sp<sup>3</sup>)-H bonds

The optimized chlorination conditions were so reactive that regioselective chlorination of C(sp<sup>3</sup>)-H bonds was not successful.

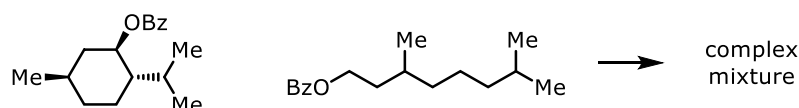

### 2. Nucleophilic attack to $^t\text{BuOCl}$

Anisole or naphthalene derivatives reacted directly with  $^t\text{BuOCl}$  irrespective of the Ag catalyst.

**undesired aryl chlorides:**

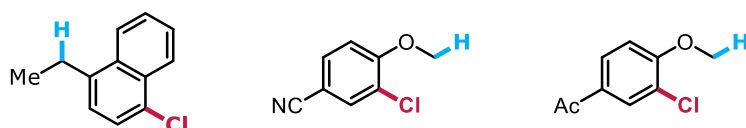

### 3. Direct oxidation of amide nitrogen atom by high-valent Ag

Amide nitrogen atoms seemed to be oxidized by a high-valent Ag that had formed from Ag catalyst and  $^t\text{BuOCl}$ . The resulting iminium cations should be attacked by water, giving C-N-bond-cleaved products.

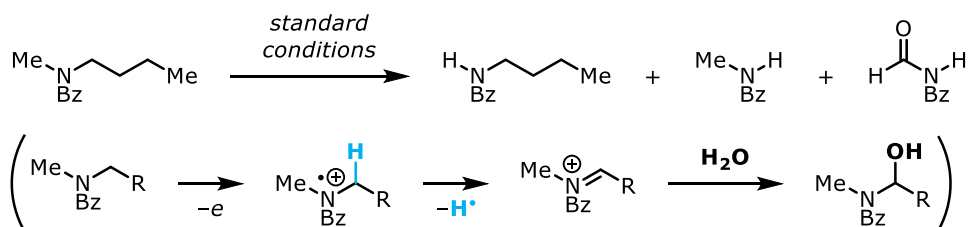

### 4. Labile functional groups

Compounds listed below gave rather complicated reaction mixtures under the optimized chlorination conditions.

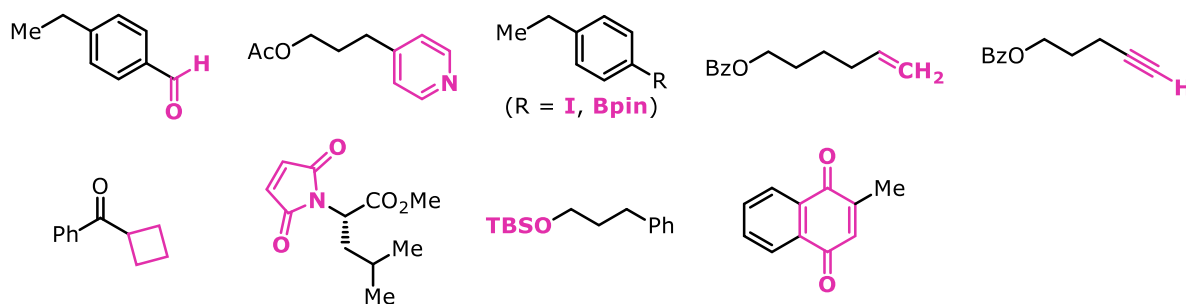

## 6. Chlorination of a chiral compound

### 6.1. Synthesis of **1w** from (-)- $\beta$ -citronellol, and conversion of **2w** to **2x**

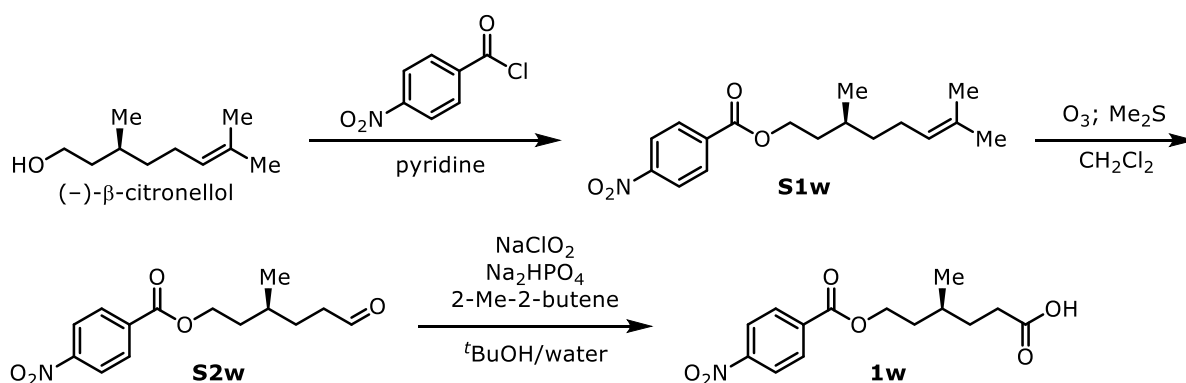

#### (-)- $\beta$ -citronellol to **S1w**

To a stirred mixture of (-)- $\beta$ -citronellol (781 mg, 5 mmol, 1 eq) in pyridine (5 mL) was added 4-nitrobenzoyl chloride (1.39 g, 1.5 eq) at room temperature. HCl in water was added after 8 h, and the mixture was extracted with Et<sub>2</sub>O. The combined organic layer was washed with HCl aq, dried over Na<sub>2</sub>SO<sub>4</sub>, and filtrated, and volatiles were removed by rotavap. The residue was purified by silica gel column chromatography (hexane/EtOAc = 20/1) so that **S1w** was obtained as yellow liquid (1.37 g, 90%).

#### **S1w** to **S2w**

A mixture of **S1w** (663 mg, 2.17 mmol, 1 eq) in CH<sub>2</sub>Cl<sub>2</sub> (5 mL, 0.4 M) cooled by acetone/dry ice bath was treated with a stream of O<sub>3</sub>/O<sub>2</sub>. After 5 min, the solution color turned blue, and then Ar was flushed through the mixture until the color disappeared. Me<sub>2</sub>S (635  $\mu$ L, 8.68 mmol, 4 eq) was added, and the cold bath was removed. After 15 h, the reaction mixture was washed with HCl aq, and the organic layer was dried over Na<sub>2</sub>SO<sub>4</sub>. After filtration, volatiles were removed by rotavap. The residue was purified by silica gel column chromatography (hexane/EtOAc = 4/1 to 2/1 to 1/2) so that **S2w** was obtained as yellow liquid (561 mg, 92%), along with **1w** (27.7 mg).

#### **S2w** to **1w**

To a stirred mixture of **S2w** (539 mg, 1.93 mmol, 1 eq), 2-methyl-2-butene (2.05 mL, 19.3 mmol, 10 eq), and Na<sub>2</sub>HPO<sub>4</sub> (1.37 g, 9.65 mmol, 5 eq) in <sup>t</sup>BuOH/water (4 mL/4 mL, 0.25 M) was added NaClO<sub>2</sub> (655 mg, 5.79 mmol, 3 eq) at room temperature. After 1h, NaCl aq was added and the mixture was extracted with EtOAc. The organic layer was washed with HCl aq and dried over Na<sub>2</sub>SO<sub>4</sub>. After filtration, the volatiles were removed by rotavap. The

residue was purified by silica gel column chromatography (hexane/EtOAc = 3/1 to 1/2) so that **1w** was obtained as yellow liquid, which gradually solidified into yellow solid (495 mg, 87%).

**[note]** Minerals on silica gel sometimes eluted with the carboxylic acid **1w**. An Et<sub>2</sub>O solution of **1w** was washed with HCl aq to remove the minerals in such a case.

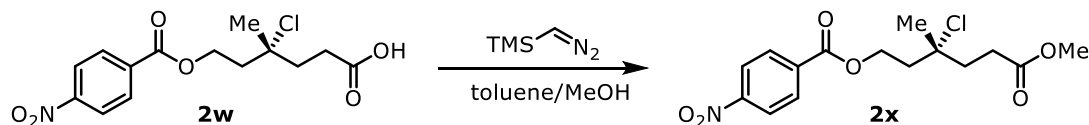

### 2w to 2x

To a solution of **2w** (38.4 mg, 0.11 mmol, 1 eq) in toluene/MeOH (330  $\mu$ L/110  $\mu$ L, 0.25 M) was added 0.6 M hexane solution of trimethylsilyldiazomethane (200  $\mu$ L, 1.05 eq) at room temperature under air. After 10 min, AcOH (a few drops) was added to quench trimethylsilyldiazomethane. The volatiles were removed by rotavap, and the residue was purified by PTLC (hexane/EtOAc = 4/1) so that **2x** was obtained as light yellow liquid (28.1 mg, 74%).

## 6.2. Chiral HPLC analysis of 2x

We analyzed **2x** using a chiral HPLC and the results are shown below. The charts indicated that the chirality disappeared during the chlorination.

### HPLC conditions

|            |                                             |
|------------|---------------------------------------------|
| column:    | CHIRALPAK® IC $\phi$ 4.6 mm $\times$ 250 mm |
| eluent:    | hexane/2-propanol = 20/1                    |
| flow rate: | 1.0 mL/min                                  |

SM: (-)-**1w**

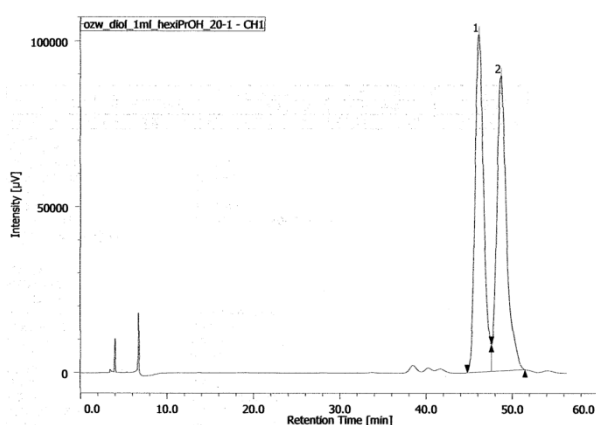

| # | ピーク名    | CH | tR [min] | 面積 [μV·sec] | 高さ [μV] | 面積%    |
|---|---------|----|----------|-------------|---------|--------|
| 1 | Unknown | 1  | 46.108   | 7054078     | 101820  | 50.099 |
| 2 | Unknown | 1  | 48.667   | 7026092     | 89041   | 49.901 |

SM: (±)-**1w**

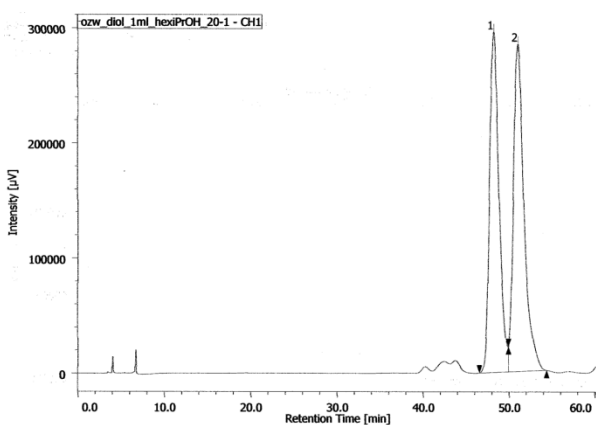

| # | ピーク名    | CH | tR [min] | 面積 [μV·sec] | 高さ [μV] | 面積%    |
|---|---------|----|----------|-------------|---------|--------|
| 1 | Unknown | 1  | 48.175   | 22451983    | 295785  | 48.026 |
| 2 | Unknown | 1  | 50.975   | 24297273    | 284276  | 51.974 |

## 7. Procedure for free *tert*-BuO radical reactions

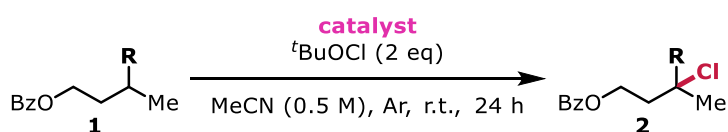

### A) *N*-hydroxyphthalimide (NHPI) conditions

To a stirred mixture of the substrate **1** (0.1 mmol, 1 eq) and NHPI (4.1 mg, 0.025 mmol, 25 mol%) in distilled MeCN (200  $\mu$ L, 0.5 M to **1**) was added *t*BuOCl (22.6  $\mu$ L, 0.2 mmol, 2 eq) under Ar atmosphere. The color of the reaction mixture turned into yellow first, and into dark yellow on adding *t*BuOCl. After stirring for 24 h, Na<sub>2</sub>SO<sub>3</sub> and water were added to the reaction mixture. The mixture was extracted with Et<sub>2</sub>O and the volatiles were removed by rotavap. The NMR yields were calculated using 1,1,2,2-tetrachloroethane as an internal standard.

### B) photoirradiation conditions

To a stirred solution of the substrate **1** (0.2 mmol, 1 eq) in distilled MeCN (400  $\mu$ L, 0.5 M to **1**) was added *t*BuOCl (45.2  $\mu$ L, 0.4 mmol, 2 eq) under Ar atmosphere. The color of the reaction mixture didn't change on adding *t*BuOCl. Then the reaction was irradiated with a white LED lump\*. After stirring for 24 h, Na<sub>2</sub>SO<sub>3</sub> and water were added to the reaction mixture. The mixture was extracted with Et<sub>2</sub>O and the volatiles were removed by rotavap. The NMR yields were calculated using 1,1,2,2-tetrachloroethane as an internal standard.

\* Irradiations were performed with VBL-SL150-WW as the photon source, white LED lamp for plant science research purchased from Valore Ltd., Kyoto, Japan.

## 8. Synthesis of authentic samples of **2e** and **2j**

Authentic samples for **2e** and **2j** were synthesized to identify the reaction products of **1e** and **1j**, because **2e** and **2j** were not detected in HRMS (ESI, DART, nor EI).

### 8.1. Synthesis of authentic **2e**

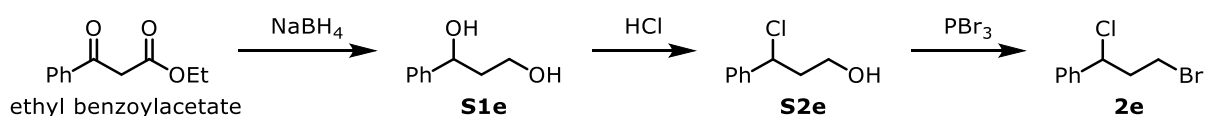

A solution of ethyl benzoylacetate (192.2 mg, 1 mmol, 1 eq) in MeOH (2 mL, 0.5 M) was treated with NaBH<sub>4</sub> (113.5 mg, 3 mmol, 3 eq) at room temperature. After 1 h, water was added to the reaction mixture. The mixture was extracted with EtOAc, and the volatiles were removed by rotavap. The residue was purified by PTLC (hexane/EtOAc = 1/2) to give **S1e** (79.9 mg, 53%).

**S1e** (188.2 mg, 1.2 mmol, 1 eq) in toluene (2.4 mL, 0.5 M) was treated with HCl aq (12 N, 250  $\mu$ L, 3 mmol, 2.5 eq) at room temperature. After 15 h, water was added, the reaction mixture was extracted with Et<sub>2</sub>O, and the volatiles were removed by rotavap. The residue was purified by silica gel column chromatography (hexane/EtOAc = 3/1) so that **S2e** was obtained as light dark orange liquid (132.3 mg, 64%).

A flask was charged with **S2e** (132.3 mg, 0.77 mmol, 1 eq) and dry CH<sub>2</sub>Cl<sub>2</sub> (1.6 mL, 0.5 M)

under argon atmosphere.  $\text{PBr}_3$  (36.7  $\mu\text{L}$ , 0.39 mmol, 0.5 eq) in dry  $\text{CH}_2\text{Cl}_2$  (400  $\mu\text{L}$ ) was added to the flask at room temperature. After 3 h, water and  $\text{Et}_2\text{O}$  were added. The organic layer was washed with water and NaCl aq, dried over  $\text{Na}_2\text{SO}_4$ , filtrated, and the volatiles were removed by rotavap. The residue was purified by silica gel column chromatography (hexane only) so that **2e** was obtained as light yellow liquid (58.4 mg, 32%).

## 8.2. Synthesis of authentic **2j**

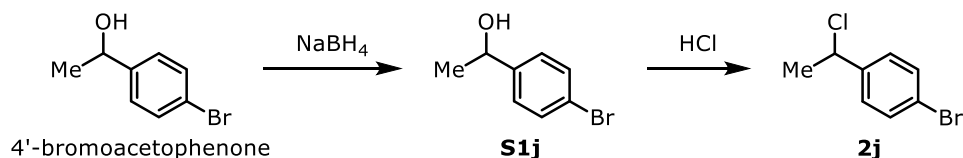

A solution of 4'-bromoacetophenone (99.5 mg, 0.5 mmol, 1 eq) in MeOH (500  $\mu\text{L}$ , 1 M) was treated with  $\text{NaBH}_4$  (28.4 mg, 0.75 mmol, 1.5 eq) at room temperature. After 4 h, water was added to the reaction mixture. The mixture was extracted with EtOAc, and the volatiles were removed by rotavap to give **S1j** (108 mg, containing EtOAc). **S1j** was used in the next step without further purification.

**S1j** was treated with HCl aq (6 N, 1 mL, around 0.5 M to **S1j**) at room temperature. After 40 h, the reaction mixture was extracted with  $\text{Et}_2\text{O}$ , and the volatiles were removed by rotavap. The residue was purified by PTLC (hexane only) so that **2j** was obtained as light yellow liquid (64.5 mg, 59%).

## 9. Analytical data

$^1\text{H}$  and  $^{13}\text{C}$  NMR data are described for **1**, which are known materials except for **1w**; full spectroscopic data for **S1w**, **S2w**, **1w** and **2** no matter whether they are new or known. HRMS for **2e** and **2j** are not described because no appropriate signals were detected. The amount of the chlorinated products is also described.

### isopentyl benzoate (**1a**)

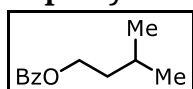

colorless liquid,  $R_f$  = 0.50 (hexane/EtOAc = 10/1)

$^1\text{H}$  NMR (500 MHz,  $\text{CDCl}_3$ )  $\delta$ : 8.04 (2H, d,  $J$  = 7.6 Hz), 7.55 (1H, t,  $J$  = 7.6 Hz), 7.43 (2H, t,  $J$  = 7.6 Hz), 4.36 (2H, t,  $J$  = 6.9 Hz), 1.75–1.85 (1H, m), 1.64–1.71 (2H, m), 0.98 (6H, d,  $J$  = 6.9 Hz)

$^{13}\text{C}$  NMR (126 MHz,  $\text{CDCl}_3$ )  $\delta$ : 166.6, 132.8, 130.5, 129.5, 128.3, 63.6, 37.4, 25.2, 22.5

### 3-chloro-3-methylbutyl benzoate (**2a**)

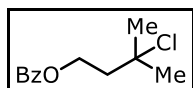

pale yellow liquid,  $R_f$  = 0.40 (hexane/EtOAc = 10/1)

**Yield:** 370 mg, 82%; 791 mg (1 g scale), 70%; 853 mg (1 g scale, AgOTf and 1,10-phen as the catalyst), 75%

$^1\text{H}$  NMR (500 MHz,  $\text{CDCl}_3$ )  $\delta$ : 8.02–8.05 (2H, m), 7.53–7.58 (1H, m), 7.41–7.46 (2H, m), 4.56 (2H, t,  $J$  = 6.8 Hz), 2.25 (2H, t,  $J$  = 6.8 Hz), 1.68 (6H, s)

$^{13}\text{C}$  NMR (126 MHz,  $\text{CDCl}_3$ )  $\delta$ : 166.4, 133.0, 130.1, 129.5, 128.3, 68.4, 62.0, 44.0, 32.9

**IR (neat, cm<sup>-1</sup>)**  $\nu$ : 2923, 1720, 1452, 1275, 1114, 712

**HRMS (ESI)**:  $m/z$  calcd for C<sub>12</sub>H<sub>15</sub>ClO<sub>2</sub>Na [M+Na]<sup>+</sup> 249.0653, Found 249.0644

**butyl benzoate (1b)**

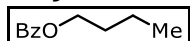

colorless liquid,  $R_f$  = 0.46 (hexane/EtOAc = 10/1)

**<sup>1</sup>H NMR (500 MHz, CDCl<sub>3</sub>)**  $\delta$ : 8.05 (2H, dd,  $J$  = 8.0 Hz, 1.1 Hz), 7.52–7.57 (1H, m), 7.41–7.46 (2H, m), 4.33 (2H, t,  $J$  = 6.6 Hz), 1.70–1.79 (2H, m), 1.43–1.53 (2H, m), 0.98 (3H, t,  $J$  = 7.4 Hz)

**<sup>13</sup>C NMR (126 MHz, CDCl<sub>3</sub>)**  $\delta$ : 166.6, 132.7, 130.5, 129.5, 128.2, 64.8, 30.7, 19.2, 13.7

**3-chlorobutyl benzoate (2b)**

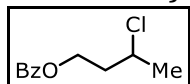

pale yellow liquid,  $R_f$  = 0.34 (hexane/EtOAc = 10/1)

**Yield**: 152 mg, 35%

**<sup>1</sup>H NMR (500 MHz, CDCl<sub>3</sub>)**  $\delta$ : 8.04 (2H, dd,  $J$  = 8.0 Hz, 1.1 Hz), 7.54–7.58 (1H, m), 7.44 (2H, t,  $J$  = 7.7 Hz), 4.43–4.55 (2H, m), 4.20–4.28 (1H, m), 2.18–2.26 (1H, m), 2.07–2.15 (1H, m), 1.60 (3H, d,  $J$  = 6.9 Hz)

**<sup>13</sup>C NMR (126 MHz, CDCl<sub>3</sub>)**  $\delta$ : 166.3, 133.0, 130.0, 129.5, 128.3, 62.0, 54.8, 39.1, 25.4

**IR (neat, cm<sup>-1</sup>)**  $\nu$ : 2974, 1720, 1452, 1274, 1114, 712

**HRMS (ESI)**:  $m/z$  calcd for C<sub>11</sub>H<sub>13</sub>ClO<sub>2</sub>Na [M+Na]<sup>+</sup> 235.0496, Found 235.0491

**pentyl benzoate (1c)**

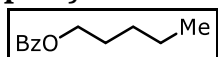

colorless liquid,  $R_f$  = 0.58 (hexane/EtOAc = 10/1)

**<sup>1</sup>H NMR (400 MHz, CDCl<sub>3</sub>)**  $\delta$ : 8.05 (2H, d,  $J$  = 7.4 Hz), 7.55 (1H, t,  $J$  = 7.4 Hz), 7.44 (2H, t,  $J$  = 7.4 Hz), 4.32 (2H, t,  $J$  = 6.7 Hz), 1.71–1.84 (2H, m), 1.32–1.49 (4H, m), 0.93 (3H, t,  $J$  = 7.0 Hz)

**<sup>13</sup>C NMR (126 MHz, CDCl<sub>3</sub>)**  $\delta$ : 166.7, 132.8, 130.5, 129.5, 128.3, 65.1, 28.4, 28.1, 22.4, 14.0

**3-chloropentyl benzoate (2c)**

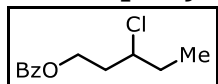

pale yellow liquid,  $R_f$  = 0.50 (hexane/EtOAc = 10/1)

**Yield**: 288 mg (2c + 2c'), 64%

**<sup>1</sup>H NMR (500 MHz, CDCl<sub>3</sub>)**  $\delta$ : 8.01–8.05 (2H, m), 7.54–7.59 (1H, m), 7.42–7.47 (2H, m), 4.44–4.58 (2H, m), 4.01–4.09 (1H, m), 2.20–2.28 (1H, m), 2.05–2.15 (1H, m), 1.73–1.92 (2H, m), 1.07 (3H, t,  $J$  = 7.4 Hz)

**<sup>13</sup>C NMR (126 MHz, CDCl<sub>3</sub>)**  $\delta$ : 166.4, 133.0, 130.1, 129.5, 128.4, 62.1, 61.6, 37.0, 31.6, 10.8

**IR (neat, cm<sup>-1</sup>)**  $\nu$ : 2970, 1720, 1452, 1274, 1114, 712

**HRMS (ESI)**:  $m/z$  calcd for C<sub>12</sub>H<sub>15</sub>ClO<sub>2</sub>Na [M+Na]<sup>+</sup> 249.0653, Found 249.0661

**4-chloropentyl benzoate (2c')**

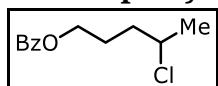

pale yellow liquid,  $R_f$  = 0.46 (hexane/EtOAc = 10/1)

**<sup>1</sup>H NMR (500 MHz, CDCl<sub>3</sub>)**  $\delta$ : 8.02–8.06 (2H, m), 7.54–7.58 (1H, m), 7.43–7.48 (2H, m), 4.32–4.37 (m, 2H), 4.06–4.13 (1H, m), 1.99–2.05 (1H, m), 1.82–1.94 (3H, m), 1.55 (3H, d,  $J$  = 6.3 Hz)

**<sup>13</sup>C NMR (126 MHz, CDCl<sub>3</sub>)**  $\delta$ : 166.5, 132.9, 130.2, 129.5, 128.3, 64.3, 58.1, 36.8, 26.0, 25.4

**IR (neat, cm<sup>-1</sup>)**  $\nu$ : 2964, 1719, 1451, 1274, 1112, 711

**HRMS (ESI)**:  $m/z$  calcd for C<sub>12</sub>H<sub>15</sub>ClO<sub>2</sub>Na [M+Na]<sup>+</sup> 249.0653, Found 249.0643

### 3-phenylpropyl acetate (1d)

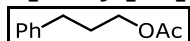

pale yellow liquid,  $R_f$  = 0.52 (hexane/EtOAc = 5/1)

**<sup>1</sup>H NMR (500 MHz, CDCl<sub>3</sub>)**  $\delta$ : 7.27–7.33 (2H, m), 7.17–7.23 (3H, m), 4.10 (2H, t,  $J$  = 6.6 Hz), 2.70 (2H, t,  $J$  = 7.7 Hz), 2.06 (3H, s), 1.94–2.01 (2H, m)

**<sup>13</sup>C NMR (126 MHz, CDCl<sub>3</sub>)**  $\delta$ : 171.1, 141.1, 128.4, 128.3, 125.9, 63.8, 32.1, 30.1, 20.9

### 3-chloro-3-phenylpropyl acetate (2d)

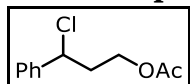

pale yellow liquid,  $R_f$  = 0.46 (hexane/EtOAc = 5/1)

**Yield**: 319 mg, 75%

**<sup>1</sup>H NMR (500 MHz, CDCl<sub>3</sub>)**  $\delta$ : 7.29–7.42 (5H, m), 4.98–5.03 (1H, m), 4.21–4.28 (1H, m), 4.12–4.18 (1H, m), 2.31–2.48 (2H, m), 2.05 (3H, s)

**<sup>13</sup>C NMR (126 MHz, CDCl<sub>3</sub>)**  $\delta$ : 170.8, 140.9, 128.7, 128.5, 126.9, 61.5, 59.8, 38.6, 20.8

**IR (neat, cm<sup>-1</sup>)**  $\nu$ : 2961, 1741, 1365, 1237, 1038, 761, 698

**HRMS (ESI)**:  $m/z$  calcd for C<sub>11</sub>H<sub>13</sub>ClO<sub>2</sub>Na [M+Na]<sup>+</sup> 235.0496, Found 235.0504

### (3-bromopropyl)benzene (1e)

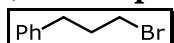

colorless liquid,  $R_f$  = 0.54 (hexane/EtOAc = 1/0)

**<sup>1</sup>H NMR (500 MHz, CDCl<sub>3</sub>)**  $\delta$ : 7.29–7.35 (2H, m), 7.20–7.25 (3H, m), 3.41 (2H, t,  $J$  = 6.6 Hz), 2.80 (2H, t,  $J$  = 7.4 Hz), 2.15–2.22 (2H, m)

**<sup>13</sup>C NMR (126 MHz, CDCl<sub>3</sub>)**  $\delta$ : 140.5, 128.52, 128.47, 126.1, 34.1, 33.9, 33.1

### (3-bromo-1-chloropropyl)benzene (2e)

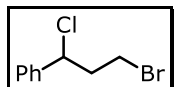

light yellow liquid,  $R_f$  = 0.44 (hexane/EtOAc = 1/0)

**Yield**: 234 mg, 50%

**<sup>1</sup>H NMR (500 MHz, CDCl<sub>3</sub>)**  $\delta$ : 7.31–7.44 (5H, m), 5.11–5.15 (1H, m), 3.56–3.62 (1H, m), 3.39–3.45 (1H, m), 2.59–2.68 (1H, m), 2.44–2.52 (1H, m)

**<sup>13</sup>C NMR (126 MHz, CDCl<sub>3</sub>)**  $\delta$ : 140.4, 128.8, 128.6, 127.0, 61.1, 42.3, 30.1

**IR (neat, cm<sup>-1</sup>)**  $\nu$ : 3031, 2967, 1492, 1454, 1258, 757, 697

**HRMS (ESI, DART, EI)**: not detected

### 1-phenylpropane-1,3-diol (S1e)

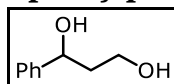

light yellow liquid,  $R_f$  = 0.42 (hexane/EtOAc = 1/2)

**<sup>1</sup>H NMR (400 MHz, CDCl<sub>3</sub>)**  $\delta$ : 7.21–7.36 (5H, m), 4.86 (1H, dd,  $J$  = 8.5 Hz, 4.0 Hz), 3.12–4.32 (2H, m), 3.68–3.80 (2H, m), 1.79–1.98 (2H, m)

**<sup>13</sup>C NMR (100 MHz, CDCl<sub>3</sub>)**  $\delta$ : 144.2, 128.3, 127.3, 125.6, 73.5, 60.7, 40.3



### 3-chloro-3-phenylpropan-1-ol (S2e)

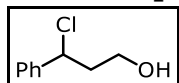

dark orange liquid,  $R_f$  = 0.77 (hexane/EtOAc = 1/2)

**$^1\text{H}$  NMR (400 MHz,  $\text{CDCl}_3$ )  $\delta$ :** 7.28–7.43 (5H, m), 5.13 (1H, dd,  $J$  = 9.4 Hz, 5.4 Hz), 3.82–3.90 (1H, m), 3.68–3.76 (1H, m), 2.20–2.39 (2H, m), 2.14 (1H, bs)

**$^{13}\text{C}$  NMR (100 MHz,  $\text{CDCl}_3$ )  $\delta$ :** 141.4, 128.7, 128.3, 126.9, 60.3, 59.6, 42.1

### (3-bromo-1-chloropropyl)benzene (2e, authentic sample)

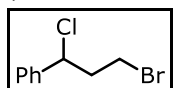

light yellow liquid,  $R_f$  = 0.44 (hexane/EtOAc = 1/0)

**$^1\text{H}$  NMR (400 MHz,  $\text{CDCl}_3$ )  $\delta$ :** 7.31–7.44 (5H, m), 5.13 (1H, dd,  $J$  = 9.0 Hz, 5.4 Hz), 3.54–3.64 (1H, m), 3.38–3.46 (1H, m), 2.58–2.70 (1H, m), 2.42–2.54 (1H, m)

**$^{13}\text{C}$  NMR (100 MHz,  $\text{CDCl}_3$ )  $\delta$ :** 140.4, 128.8, 128.6, 127.0, 61.1, 42.3, 30.1

**IR (neat,  $\text{cm}^{-1}$ )  $\nu$ :** 3032, 2968, 1493, 1454, 1258, 758, 697

### 4-phenylbutyronitrile (1f)

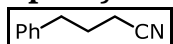

colorless liquid,  $R_f$  = 0.48 (hexane/EtOAc = 5/1)

**$^1\text{H}$  NMR (400 MHz,  $\text{CDCl}_3$ )  $\delta$ :** 7.29–7.36 (2H, m), 7.17–7.28 (3H, m), 2.79 (2H, t,  $J$  = 7.4 Hz), 2.32 (2H, t,  $J$  = 7.2 Hz), 1.94–2.03 (2H, m)

**$^{13}\text{C}$  NMR (100 MHz,  $\text{CDCl}_3$ )  $\delta$ :** 139.6, 128.5, 128.3, 126.4, 119.4, 34.2, 26.8, 16.2

### 4-chloro-4-phenylbutyronitrile (2f)

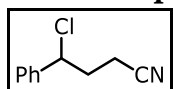

yellow liquid; ,  $R_f$  = 0.40 (hexane/EtOAc = 5/1)

**Yield:** 255 mg, 71%

**$^1\text{H}$  NMR (400 MHz,  $\text{CDCl}_3$ )  $\delta$ :** 7.32–7.43 (5H, m), 4.96–5.01 (1H, m), 2.28–2.64 (4H, m)

**$^{13}\text{C}$  NMR (100 MHz,  $\text{CDCl}_3$ )  $\delta$ :** 139.6, 128.9, 126.7, 118.4, 61.1, 35.3, 15.2

**IR (neat,  $\text{cm}^{-1}$ )  $\nu$ :** 2934, 2247, 1492, 1455, 1247, 761

**HRMS (ESI):**  $m/z$  calcd for  $\text{C}_{10}\text{H}_{10}\text{ClNNa}$  [ $\text{M}+\text{Na}$ ] $^+$  202.0394, Found 202.0397

### 3-phenylpropyl pivalate (1g)

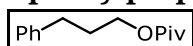

colorless liquid,  $R_f$  = 0.54 (hexane/EtOAc = 10/1)

**$^1\text{H}$  NMR (500 MHz,  $\text{CDCl}_3$ )  $\delta$ :** 7.30 (2H, t,  $J$  = 7.4 Hz), 7.20 (3H, t,  $J$  = 8.3 Hz), 4.09 (2H, t,  $J$  = 6.6 Hz), 2.71 (2H, t,  $J$  = 7.7 Hz), 1.94–2.01 (2H, m), 1.23 (9H, s)

**$^{13}\text{C}$  NMR (126 MHz,  $\text{CDCl}_3$ )  $\delta$ :** 178.5, 141.2, 128.39, 128.36, 125.9, 63.5, 38.7, 32.1, 30.3, 27.1

### 3-chloro-3-phenylpropyl pivalate (2g)

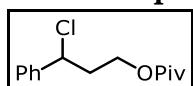

light yellow liquid,  $R_f$  = 0.48 (hexane/EtOAc = 10/1)

**Yield:** 406 mg, 80%

**$^1\text{H}$  NMR (500 MHz,  $\text{CDCl}_3$ )  $\delta$ :** 7.32–7.41 (5H, m), 4.99 (1H, dd,  $J$  = 8.6 Hz, 5.7 Hz), 4.20–4.26 (1H, m), 4.08–4.14 (1H, m), 2.32–2.48 (2H, m), 1.21 (9H, s)

**<sup>13</sup>C NMR (100 MHz, CDCl<sub>3</sub>) δ:** 178.2, 140.9, 128.8, 128.5, 126.8, 61.4, 59.9, 38.8, 38.7, 27.1

**IR (neat, cm<sup>-1</sup>) ν:** 2972, 1730, 1479, 1283, 1154, 1035, 759, 698

**HRMS (ESI):** *m/z* calcd for C<sub>14</sub>H<sub>19</sub>ClO<sub>2</sub>Na [M+Na]<sup>+</sup> 277.0966, Found 277.0956

#### 1-ethyl-4-nitrobenzene (1h)

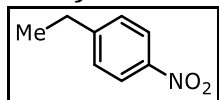

yellow liquid, *R<sub>f</sub>* = 0.65 (hexane/EtOAc = 5/1)

**<sup>1</sup>H NMR (500 MHz, CDCl<sub>3</sub>) δ:** 8.08–8.13 (2H, m), 7.32 (2H, d, *J* = 8.6 Hz), 2.74 (2H, q, *J* = 7.7 Hz), 1.26 (3H, t, *J* = 7.7 Hz)

**<sup>13</sup>C NMR (126 MHz, CDCl<sub>3</sub>) δ:** 152.0, 146.1, 128.5, 123.5, 28.7, 14.9

#### 1-(1-chloroethyl)-4-nitrobenzene (2h)

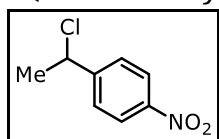

yellow liquid, *R<sub>f</sub>* = 0.52 (hexane/EtOAc = 5/1)

**Yield:** 231 mg, 62%

**<sup>1</sup>H NMR (500 MHz, CDCl<sub>3</sub>) δ:** 8.21 (2H, d, *J* = 8.9 Hz), 7.59 (2H, d, *J* = 8.9 Hz), 5.13 (1H, q, *J* = 6.9 Hz), 1.86 (3H, d, *J* = 6.9 Hz);

**<sup>13</sup>C NMR (126 MHz, CDCl<sub>3</sub>) δ:** 149.6, 147.5, 127.5, 123.9, 56.8, 26.3

**IR (neat, cm<sup>-1</sup>) ν:** 2982, 1606, 1523, 1349, 856, 781, 698

**HRMS (ESI):** *m/z* calcd for C<sub>8</sub>H<sub>8</sub>ClNO<sub>2</sub>Na [M+Na]<sup>+</sup> 208.0136, Found 208.0146

#### 4-ethylbenzonitrile (1i)

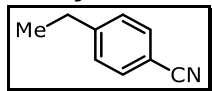

yellow liquid, *R<sub>f</sub>* = 0.60 (hexane/EtOAc = 5/1)

**<sup>1</sup>H NMR (500 MHz, CDCl<sub>3</sub>) δ:** 7.55 (2H, d, *J* = 8.3 Hz), 7.28 (2H, d, *J* = 8.3 Hz), 2.69 (2H, q, *J* = 7.4 Hz), 1.24 (3H, t, *J* = 7.4 Hz)

**<sup>13</sup>C NMR (126 MHz, CDCl<sub>3</sub>) δ:** 149.7, 132.0, 128.6, 119.1, 109.3, 28.9, 14.9

#### 4-(1-chloroethyl)benzonitrile (2i)

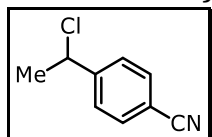

light yellow liquid, *R<sub>f</sub>* = 0.50 (hexane/EtOAc = 5/1)

**Yield:** 200 mg, 60%

**<sup>1</sup>H NMR (500 MHz, CDCl<sub>3</sub>) δ:** 7.64 (2H, d, *J* = 8.3 Hz), 7.52 (2H, d, *J* = 8.3 Hz), 5.07 (1H, q, *J* = 6.9 Hz), 1.83 (3H, d, *J* = 6.9 Hz)

**<sup>13</sup>C NMR (126 MHz, CDCl<sub>3</sub>) δ:** 147.7, 132.4, 127.3, 118.4, 111.9, 57.2, 26.2

**IR (neat, cm<sup>-1</sup>) ν:** 2981, 2360, 2229, 1922, 1608, 1505, 1415, 1232, 1047, 838, 668

**HRMS (ESI):** *m/z* calcd for C<sub>9</sub>H<sub>8</sub>ClNNa [M+Na]<sup>+</sup> 188.0238, Found 188.0230

#### 1-bromo-4-ethylbenzene (1j)

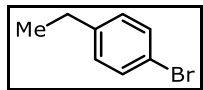

colorless liquid,  $R_f = 0.66$  (hexane/EtOAc = 1/0)

**$^1\text{H}$  NMR (500 MHz,  $\text{CDCl}_3$ )  $\delta$ :** 7.41 (2H, d,  $J = 8.0$  Hz), 7.08 (2H, d,  $J = 8.0$  Hz), 2.61 (2H, q,  $J = 7.5$  Hz), 1.23 (3H, t,  $J = 7.5$  Hz)

**$^{13}\text{C}$  NMR (126 MHz,  $\text{CDCl}_3$ )  $\delta$ :** 143.1, 131.3, 129.6, 119.2, 28.3, 15.4

**1-bromo-4-(1-chloroethyl)benzene (2j)**

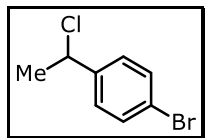

light yellow liquid,  $R_f = 0.52$  (hexane/EtOAc = 1/0)

**Yield:** 200 mg, 46%

**$^1\text{H}$  NMR (500 MHz,  $\text{CDCl}_3$ )  $\delta$ :** 7.47–7.50 (2H, m), 7.29–7.31 (2H, m), 5.04 (1H, q,  $J = 6.9$  Hz), 1.82 (3H, d,  $J = 6.9$  Hz)

**$^{13}\text{C}$  NMR (126 MHz,  $\text{CDCl}_3$ )  $\delta$ :** 141.8, 131.7, 128.2, 122.1, 57.8, 26.4

**IR (neat,  $\text{cm}^{-1}$ )  $\nu$ :** 2978, 2926, 1592, 1489, 1406, 1226, 1074, 1011, 825, 786, 717

**HRMS (ESI, DART, EI):** not detected

**1-(4-bromophenyl)ethan-1-ol (S1j)**

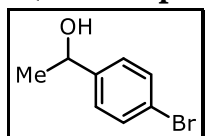

Light yellow liquid,  $R_f = 0.42$  (hexane/EtOAc = 3/1)

**$^1\text{H}$  NMR (500 MHz,  $\text{CDCl}_3$ )  $\delta$ :** 7.46 (2H, d,  $J = 7.2$  Hz), 7.23 (2H, d,  $J = 7.2$  Hz), 4.84 (1H, q,  $J = 6.7$  Hz), 2.09 (bs, 1H), 1.45 (3H, d,  $J = 6.7$  Hz)

**$^{13}\text{C}$  NMR (126 MHz,  $\text{CDCl}_3$ )  $\delta$ :** 144.7, 131.5, 127.1, 121.1, 69.7, 25.2

**1-bromo-4-(1-chloroethyl)benzene (2j, authentic sample)**

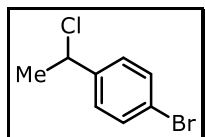

light yellow liquid,  $R_f = 0.52$  (hexane/EtOAc = 1/0)

**$^1\text{H}$  NMR (500 MHz,  $\text{CDCl}_3$ )  $\delta$ :** 7.49 (2H, d,  $J = 8.6$  Hz), 7.30 (2H, d,  $J = 8.6$  Hz), 5.04 (1H, q,  $J = 6.9$  Hz), 1.83 (3H, d,  $J = 6.9$  Hz)

**$^{13}\text{C}$  NMR (126 MHz,  $\text{CDCl}_3$ )  $\delta$ :** 141.8, 131.7, 128.2, 122.1, 57.8, 26.4

**IR (neat,  $\text{cm}^{-1}$ )  $\nu$ :** 2976, 2926, 1592, 1489, 1406, 1226, 1074, 1011, 825, 785, 717

**4'-ethylacetophenone (1k)**

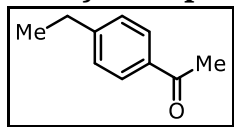

colorless liquid,  $R_f = 0.54$  (hexane/EtOAc = 5/1)

**$^1\text{H}$  NMR (500 MHz,  $\text{CDCl}_3$ )  $\delta$ :** 7.88 (2H, d,  $J = 8.3$  Hz), 7.27 (2H, d,  $J = 8.3$  Hz), 2.70 (2H, q,  $J = 7.5$  Hz), 2.57 (3H, s), 1.25 (3H, t,  $J = 7.5$  Hz)

**$^{13}\text{C}$  NMR (126 MHz,  $\text{CDCl}_3$ )  $\delta$ :** 197.8, 150.0, 134.8, 128.5, 128.0, 28.9, 26.5, 15.1

### 1-(4-(1-chloroethyl)phenyl)ethan-1-one (2k)

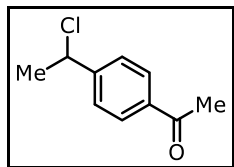

light yellow liquid,  $R_f$  = 0.44 (hexane/EtOAc = 5/1)

**Yield:** 274 mg, 75%

**$^1\text{H}$  NMR (500 MHz,  $\text{CDCl}_3$ )  $\delta$ :** 7.94 (2H, d,  $J$  = 8.3 Hz), 7.50 (2H, d,  $J$  = 8.3 Hz), 5.10 (1H, q,  $J$  = 6.9 Hz), 2.59 (3H, s), 1.84 (3H, d,  $J$  = 6.9 Hz)

**$^{13}\text{C}$  NMR (126 MHz,  $\text{CDCl}_3$ )  $\delta$ :** 197.4, 147.7, 136.8, 128.7, 126.7, 57.7, 26.6, 26.3

**IR (neat,  $\text{cm}^{-1}$ )  $\nu$ :** 2979, 1685, 1608, 1415, 1359, 1267, 1047, 838, 683

**HRMS (ESI):**  $m/z$  calcd for  $\text{C}_{10}\text{H}_{11}\text{ClO}_2\text{Na}$  [ $\text{M}+\text{Na}$ ] $^+$  205.0391, Found 205.0397

### 5-methylhexanoic acid (1l)

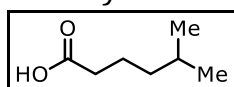

colorless liquid,  $R_f$  = 0.52 (hexane/EtOAc = 2/1)

**$^1\text{H}$  NMR (500 MHz,  $\text{CDCl}_3$ )  $\delta$ :** 10.82 (1H, bs), 2.33 (2H, t,  $J$  = 7.4 Hz), 1.60–1.67 (2H, m), 1.51–1.60 (1H, m), 1.18–1.24 (2H, m), 0.88 (6H, d,  $J$  = 6.3 Hz)

**$^{13}\text{C}$  NMR (126 MHz,  $\text{CDCl}_3$ )  $\delta$ :** 180.6, 38.2, 34.3, 27.7, 22.5, 22.4

### 5-chloro-5-methylhexanoic acid (2l)

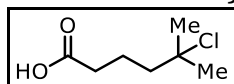

yellow liquid,  $R_f$  = 0.36 (hexane/EtOAc = 2/1)

**Yield:** 281 mg, 85%

**$^1\text{H}$  NMR (500 MHz,  $\text{CDCl}_3$ )  $\delta$ :** 9.45 (1H, bs), 2.38 (2H, t,  $J$  = 7.2 Hz), 1.73–1.87 (4H, m), 1.56 (6H, s)

**$^{13}\text{C}$  NMR (126 MHz,  $\text{CDCl}_3$ )  $\delta$ :** 179.5, 70.3, 45.0, 33.8, 32.3, 20.3

**IR (neat,  $\text{cm}^{-1}$ )  $\nu$ :** 2972, 2667, 1714, 1281, 1115, 938, 826

**HRMS (ESI):**  $m/z$  calcd for  $\text{C}_7\text{H}_{13}\text{ClO}_2\text{Na}$  [ $\text{M}+\text{Na}$ ] $^+$  187.0496, Found 187.0503

### 2-butyloisoindoline-1,3-dione (1m)

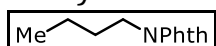

white solid,  $R_f$  = 0.60 (hexane/EtOAc = 3/1)

**$^1\text{H}$  NMR (500 MHz,  $\text{CDCl}_3$ )  $\delta$ :** 7.80 (2H, dd,  $J$  = 5.1 Hz, 3.1 Hz), 7.67 (2H, dd,  $J$  = 5.1 Hz, 3.1 Hz), 3.65 (2H, t,  $J$  = 7.4 Hz), 1.58–1.66 (2H, m), 1.29–1.38 (2H, m), 0.91 (3H, t,  $J$  = 7.2 Hz)

**$^{13}\text{C}$  NMR (126 MHz,  $\text{CDCl}_3$ )  $\delta$ :** 168.3, 133.7, 132.1, 123.0, 37.7, 30.5, 20.0, 13.6

### 2-(3-chlorobutyl)isoindoline-1,3-dione (2m)

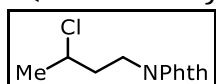

white solid,  $R_f$  = 0.48 (hexane/EtOAc = 3/1)

**Yield:** 295 mg, 62%

**$^1\text{H}$  NMR (500 MHz,  $\text{CDCl}_3$ )  $\delta$ :** 7.79–7.85 (2H, m), 7.67–7.73 (2H, m), 3.98–4.07 (1H, m), 3.76–3.90 (2H, m), 1.99–2.13 (2H, m), 1.54 (3H, d,  $J$  = 6.3 Hz)

**$^{13}\text{C}$  NMR (126 MHz,  $\text{CDCl}_3$ )  $\delta$ :** 168.2, 133.9, 132.0, 123.2, 55.5, 38.6, 35.6, 25.2

**IR (neat,  $\text{cm}^{-1}$ )  $\nu$ :** 2975, 1773, 1712, 1397, 720

**HRMS (ESI):**  $m/z$  calcd for  $C_{12}H_{12}ClNO_2Na$   $[M+Na]^+$  260.0449, Found 260.0445

**methyl 3-(4-acetoxyphenyl)propanoate (1n)**

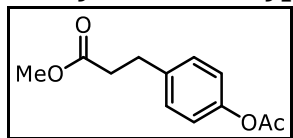

colorless liquid,  $R_f$  = 0.52 for hexane/EtOAc = 2/1; 0.48 for hexane/EtOAc = 10/1  $\times$  4 times

**$^1H$  NMR (400 MHz,  $CDCl_3$ )  $\delta$ :** 7.20 (2H, d,  $J$  = 8.5 Hz), 6.99 (2H, d,  $J$  = 8.5 Hz), 3.66 (3H, s), 2.93 (2H, t,  $J$  = 7.8 Hz), 2.62 (2H, t,  $J$  = 7.8 Hz), 2.28 (3H, s)

**$^{13}C$  NMR (100 MHz,  $CDCl_3$ )  $\delta$ :** 173.1, 169.6, 149.0, 138.0, 129.2, 121.5, 51.6, 35.5, 30.2, 21.0

**methyl 3-(4-acetoxyphenyl)-3-chloropropanoate (2n)**

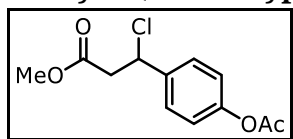

white solid,  $R_f$  = 0.52 for hexane/EtOAc = 2/1; 0.40 for hexane/EtOAc = 10/1  $\times$  4 times

**Yield:** 30 mg, 58% (0.2 mmol scale)

**$^1H$  NMR (400 MHz,  $CDCl_3$ )  $\delta$ :** 7.42 (2H, dt,  $J$  = 9.2 Hz, 2.5 Hz), 7.08 (2H, dt,  $J$  = 9.2 Hz, 2.5 Hz), 5.34 (1H, dd,  $J$  = 9.3 Hz, 5.7 Hz), 3.70 (3H, s), 3.16 (1H, dd,  $J$  = 16.2 Hz, 9.3 Hz), 3.01 (1H, dd,  $J$  = 16.2 Hz, 5.7 Hz), 2.29 (3H, s)

**$^{13}C$  NMR (100 MHz,  $CDCl_3$ )  $\delta$ :** 169.9, 169.2, 150.6, 137.7, 128.1, 121.9, 57.3, 52.1, 44.6, 21.1

**IR (neat,  $cm^{-1}$ )  $\nu$ :** 2954, 1741, 1508, 1437, 1370, 1201, 1016, 910

**HRMS (ESI):**  $m/z$  calcd for  $C_{12}H_{13}ClO_4Na$   $[M+Na]^+$  279.0395, Found 279.0394

**4-methyl-1-phenylpentan-1-one (1o)<sup>2</sup>**

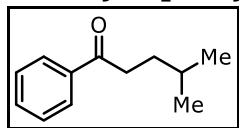

colorless liquid,  $R_f$  = 0.62 (hexane/EtOAc = 10/1)

**$^1H$  NMR (400 MHz,  $CDCl_3$ )  $\delta$ :** 7.94–7.98 (2H, m), 7.52–7.57 (1H, m), 7.42–7.48 (2H, m), 2.96 (2H, t,  $J$  = 7.4 Hz), 1.59–1.70 (3H, m), 0.95 (6H, d,  $J$  = 6.3 Hz)

**$^{13}C$  NMR (100 MHz,  $CDCl_3$ )  $\delta$ :** 200.7, 137.0, 132.8, 128.5, 128.0, 36.6, 33.2, 27.8, 22.4

**4-chloro-4-methyl-1-phenylpentan-1-one (2o)**

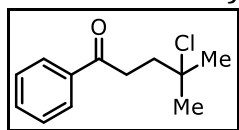

white solid,  $R_f$  = 0.44 (hexane/EtOAc = 10/1)

**Yield:** 214 mg, 51%

**$^1H$  NMR (500 MHz,  $CDCl_3$ )  $\delta$ :** 8.00 (2H, d,  $J$  = 7.4 Hz), 7.57 (1H, t,  $J$  = 7.4 Hz), 7.48 (2H, t,  $J$  = 7.4 Hz), 3.24 (2H, t,  $J$  = 7.7 Hz), 2.20 (2H, t,  $J$  = 7.7 Hz), 1.64 (6H, s)

**$^{13}C$  NMR (126 MHz,  $CDCl_3$ )  $\delta$ :** 199.4, 136.8, 133.1, 128.6, 128.1, 70.4, 39.6, 34.7, 32.6

**IR (neat,  $cm^{-1}$ )  $\nu$ :** 2972, 1686, 1448, 1371, 1215, 1110, 742, 689

**HRMS (ESI):**  $m/z$  calcd for  $C_{12}H_{15}ClONa$   $[M+Na]^+$  233.0704, Found 233.0706

<sup>2</sup> Liang, Y.-F.; Zhou, X.-F.; Tang, S.-Y.; Huang, Y.-B.; Feng, Y.-S.; Xu, H.-J. *RSC Adv.* **2013**, 3, 7739–7742.

**methyl (S)-2-(1,3-dioxoisindolin-2-yl)-4-methylpentanoate (1p)**

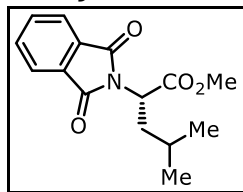

light yellow liquid,  $R_f$  = 0.37 (hexane/EtOAc = 5/1),  $[\alpha]_D^{19} = -27.2$  ( $c$  = 1.08, MeOH)

**$^1\text{H}$  NMR (400 MHz,  $\text{CDCl}_3$ )  $\delta$ :** 7.85 (2H, dd,  $J$  = 5.5 Hz, 3.0 Hz), 7.73 (2H, dd,  $J$  = 5.5 Hz, 3.0 Hz), 4.93 (1H, dd,  $J$  = 11.4 Hz, 4.3 Hz), 3.71 (3H, s), 2.27–2.37 (1H, m), 1.89–1.99 (1H, m), 1.40–1.53 (1H, m), 0.92 (6H, dd,  $J$  = 10.5 Hz, 6.5 Hz)

**$^{13}\text{C}$  NMR (100 MHz,  $\text{CDCl}_3$ )  $\delta$ :** 170.2, 167.7, 134.1, 131.7, 123.5, 52.7, 50.5, 37.2, 25.0, 23.1, 20.9

**methyl (S)-4-chloro-2-(1,3-dioxoisindolin-2-yl)-4-methylpentanoate (2p)**

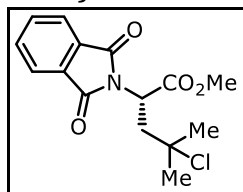

white solid,  $R_f$  = 0.34 (hexane/EtOAc = 3/1),  $[\alpha]_D^{19} = -24.7$  ( $c$  = 0.930, MeOH)

**Yield:** 585 mg, 94%

**$^1\text{H}$  NMR (500 MHz,  $\text{CDCl}_3$ )  $\delta$ :** 7.83–7.90 (2H, m), 7.71–7.76 (2H, m), 5.20 (1H, dd,  $J$  = 9.6 Hz, 2.9 Hz), 3.70–3.74 (3H, m), 2.69–2.85 (2H, m), 1.64 (3H, s), 1.55 (3H, s)

**$^{13}\text{C}$  NMR (126 MHz,  $\text{CDCl}_3$ )  $\delta$ :** 169.6, 167.6, 134.2, 131.6, 123.6, 68.1, 53.1, 49.2, 42.8, 33.2, 31.9

**IR (neat,  $\text{cm}^{-1}$ )  $\nu$ :** 2977, 1746, 1715, 1389, 1271, 1138, 720

**HRMS (ESI):**  $m/z$  calcd for  $\text{C}_{15}\text{H}_{16}\text{ClNO}_4\text{Na}$   $[\text{M}+\text{Na}]^+$  332.0660, Found 332.0664

**2-methylbenzonitrile (1q)**

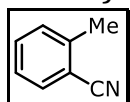

colorless liquid,  $R_f$  = 0.65 (hexane/EtOAc = 5/1)

**$^1\text{H}$  NMR (400 MHz,  $\text{CDCl}_3$ )  $\delta$ :** 7.58 (1H, dd,  $J$  = 7.6 Hz, 0.9 Hz), 7.47 (1H, td,  $J$  = 7.7 Hz, 1.2 Hz), 7.31 (1H, dd,  $J$  = 7.9 Hz, 0.6 Hz), 7.24–7.28 (1H, m), 2.54 (3H, s)

**$^{13}\text{C}$  NMR (100 MHz,  $\text{CDCl}_3$ )  $\delta$ :** 141.9, 132.6, 132.4, 130.2, 126.2, 118.1, 112.7, 20.4

**2-(chloromethyl)benzonitrile (2q)**

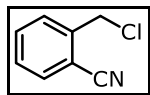

light yellow solid,  $R_f$  = 0.50 (hexane/EtOAc = 5/1)

**Yield:** 128 mg, 42%

**$^1\text{H}$  NMR (500 MHz,  $\text{CDCl}_3$ )  $\delta$ :** 7.67 (1H, d,  $J$  = 7.6 Hz), 7.56–7.65 (2H, m), 7.44 (1H, td,  $J$  = 7.4 Hz, 1.6 Hz), 4.75 (2H, s)

**$^{13}\text{C}$  NMR (126 MHz,  $\text{CDCl}_3$ )  $\delta$ :** 140.6, 133.2, 133.0, 130.0, 128.9, 116.7, 112.2, 43.1

**IR (neat,  $\text{cm}^{-1}$ )  $\nu$ :** 3021, 2225, 1597, 1489, 1452, 1271, 1217, 832, 754, 673

**HRMS (ESI):**  $m/z$  calcd for  $\text{C}_8\text{H}_6\text{ClNNa}$   $[\text{M}+\text{Na}]^+$  174.0081, Found 174.0074

### ***o*-tolyl methanesulfonate (1r)**

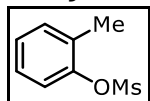

colorless liquid,  $R_f$  = 0.50 (hexane/EtOAc = 3/1)

**$^1\text{H}$  NMR (500 MHz,  $\text{CDCl}_3$ )  $\delta$ :** 7.19–7.30 (4H, m), 3.18 (3H, s), 2.37 (3H, s)

**$^{13}\text{C}$  NMR (126 MHz,  $\text{CDCl}_3$ )  $\delta$ :** 147.8, 131.8, 131.2, 127.2, 122.0, 38.0, 16.5

### **2-(chloromethyl)phenyl methanesulfonate (2r)**

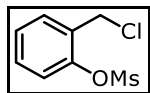

colorless liquid,  $R_f$  = 0.48 (hexane/EtOAc = 3/1)

**Yield:** 14 mg, 32% (0.2 mmol scale)

**$^1\text{H}$  NMR (500 MHz,  $\text{CDCl}_3$ )  $\delta$ :** 7.52 (1H, dd,  $J$  = 7.6 Hz, 1.7 Hz), 7.37–7.44 (2H, m), 7.33 (1H, td,  $J$  = 7.3 Hz, 16 Hz), 4.69 (2H, s), 3.27 (3H, s)

**$^{13}\text{C}$  NMR (126 MHz,  $\text{CDCl}_3$ )  $\delta$ :** 146.9, 131.5, 130.4, 130.2, 127.6, 122.3, 40.5, 38.3

**IR (neat,  $\text{cm}^{-1}$ )  $\nu$ :** 3030, 2939, 1585, 1490, 1363, 1153, 1090, 970, 876, 805, 670

**HRMS (ESI):**  $m/z$  calcd for  $\text{C}_8\text{H}_9\text{ClO}_3\text{SNa}$   $[\text{M}+\text{Na}]^+$  242.9853, Found 242.9861

### **ethyl 2-methylbenzoate (1s)**

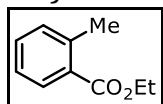

colorless liquid,  $R_f$  = 0.56 (hexane/EtOAc = 10/1)

**$^1\text{H}$  NMR (500 MHz,  $\text{CDCl}_3$ )  $\delta$ :** 7.91 (1H, dd,  $J$  = 8.0 Hz, 1.3 Hz), 7.39 (1H, td,  $J$  = 7.5 Hz, 1.3 Hz), 7.22–7.27 (2H, m), 4.36 (2H, q,  $J$  = 7.2 Hz), 2.60 (3H, s), 1.39 (3H, t,  $J$  = 7.2 Hz)

**$^{13}\text{C}$  NMR (126 MHz,  $\text{CDCl}_3$ )  $\delta$ :** 167.7, 139.9, 131.8, 131.6, 130.4, 129.9, 125.6, 60.6, 21.7, 14.3

### **ethyl 2-(chloromethyl)benzoate (2s)**

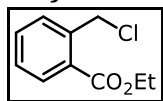

light yellow liquid,  $R_f$  = 0.42 (hexane/EtOAc = 10/1)

**Yield:** 177 mg, 45%

**$^1\text{H}$  NMR (500 MHz,  $\text{CDCl}_3$ )  $\delta$ :** 7.98 (1H, d,  $J$  = 7.4 Hz), 7.49–7.55 (2H, m), 7.37–7.41 (1H, m), 5.04 (2H, s), 4.40 (2H, q,  $J$  = 7.2 Hz), 1.41 (3H, t,  $J$  = 7.2 Hz)

**$^{13}\text{C}$  NMR (126 MHz,  $\text{CDCl}_3$ )  $\delta$ :** 166.7, 138.6, 132.3, 131.0, 130.8, 129.4, 128.3, 61.2, 44.4, 14.2

**IR (neat,  $\text{cm}^{-1}$ )  $\nu$ :** 2981, 1716, 1602, 1448, 1366, 1269, 1131, 1080, 714, 679

**HRMS (ESI):**  $m/z$  calcd for  $\text{C}_{10}\text{H}_{11}\text{ClO}_2\text{Na}$   $[\text{M}+\text{Na}]^+$  221.0340, Found 221.0331

### **methyl 3-methylbenzoate (1t)**

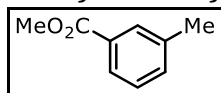

colorless liquid,  $R_f$  = 0.52 (hexane/EtOAc = 10/1)

**$^1\text{H}$  NMR (500 MHz,  $\text{CDCl}_3$ )  $\delta$ :** 7.82–7.87 (2H, m), 7.30–7.38 (2H, m), 3.91 (3H, s), 2.40 (3H, s)

**$^{13}\text{C}$  NMR (126 MHz,  $\text{CDCl}_3$ )  $\delta$ :** 167.3, 138.1, 133.6, 130.1, 130.0, 128.2, 126.7, 52.0, 21.2

**methyl 3-(chloromethyl)benzoate (2t)**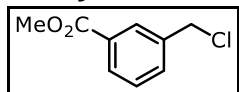

light yellow liquid,  $R_f$  = 0.40 (hexane/EtOAc = 10/1)

**Yield:** 14 mg, 38% (0.2 mmol scale)

**$^1\text{H}$  NMR (500 MHz,  $\text{CDCl}_3$ )  $\delta$ :** 8.07 (1H, bs), 8.00 (1H, d,  $J$  = 7.4 Hz), 7.59 (1H, d,  $J$  = 7.4 Hz), 7.45 (1H, t,  $J$  = 7.7 Hz), 4.62 (2H, s), 3.93 (3H, s)

**$^{13}\text{C}$  NMR (126 MHz,  $\text{CDCl}_3$ )  $\delta$ :** 166.6, 137.8, 133.0, 130.7, 129.6, 129.5, 128.9, 52.2, 45.5

**IR (neat,  $\text{cm}^{-1}$ )  $\nu$ :** 2952, 1724, 1591, 1434, 1291, 1205, 1108, 990, 759, 708

**HRMS (ESI):**  $m/z$  calcd for  $\text{C}_9\text{H}_9\text{ClO}_2\text{Na}$   $[\text{M}+\text{Na}]^+$  207.0183, Found 207.0174

**tert-butyl 4-methylbenzoate (1u)**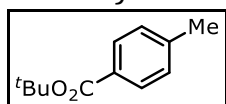

colorless liquid,  $R_f$  = 0.48 (hexane/EtOAc = 10/1)

**$^1\text{H}$  NMR (400 MHz,  $\text{CDCl}_3$ )  $\delta$ :** 7.88 (2H, d,  $J$  = 8.3 Hz), 7.21 (2H, d,  $J$  = 8.3 Hz), 2.39 (3H, s), 1.59 (9H, s)

**$^{13}\text{C}$  NMR (100 MHz,  $\text{CDCl}_3$ )  $\delta$ :** 165.9, 142.9, 129.4, 129.2, 128.8, 80.6, 28.2, 21.5

**tert-butyl 4-(chloromethyl)benzoate (2u)**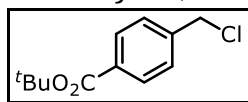

white solid,  $R_f$  = 0.42 (hexane/EtOAc = 10/1)

**Yield:** 17 mg, 36% (0.2 mmol scale)

**$^1\text{H}$  NMR (500 MHz,  $\text{CDCl}_3$ )  $\delta$ :** 7.98 (2H, d,  $J$  = 8.0 Hz), 7.43 (2H, d,  $J$  = 8.0 Hz), 4.60 (2H, s), 1.59 (9H, s)

**$^{13}\text{C}$  NMR (126 MHz,  $\text{CDCl}_3$ )  $\delta$ :** 165.2, 141.7, 132.0, 129.8, 128.3, 81.2, 45.4, 28.1

**IR (neat,  $\text{cm}^{-1}$ )  $\nu$ :** 2979, 1714, 1612, 1414, 1368, 1294, 1167, 1119, 1019, 849, 713

**HRMS (ESI):**  $m/z$  calcd for  $\text{C}_{12}\text{H}_{15}\text{ClO}_2\text{Na}$   $[\text{M}+\text{Na}]^+$  249.0653, Found 249.0652

**1-tetralone (1v)**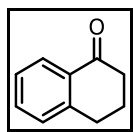

yellow liquid,  $R_f$  = 0.38 (hexane/EtOAc = 5/1)

**$^1\text{H}$  NMR (500 MHz,  $\text{CDCl}_3$ )  $\delta$ :** 8.02 (1H, d,  $J$  = 8.0 Hz), 7.45 (1H, td,  $J$  = 7.4 Hz, 1.1 Hz), 7.29 (1H, t,  $J$  = 7.4 Hz), 7.24 (1H, d,  $J$  = 8.0 Hz), 2.95 (2H, t,  $J$  = 6.3 Hz), 2.64 (2H, t,  $J$  = 6.3 Hz), 2.09–2.16 (2H, m)

**$^{13}\text{C}$  NMR (126 MHz,  $\text{CDCl}_3$ )  $\delta$ :** 198.3, 144.4, 133.3, 132.5, 128.7, 127.0, 126.5, 39.1, 29.6, 23.2

**4-chloro-1-tetralone (2v)**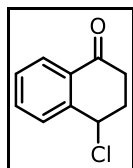

yellow liquid,  $R_f$  = 0.34 (hexane/EtOAc = 5/1)

**Yield:** 219 mg, 61%



**<sup>1</sup>H NMR (500 MHz, CDCl<sub>3</sub>) δ:** 8.05 (1H, d, *J* = 8.6 Hz), 7.58 (1H, t, *J* = 8.3 Hz), 7.42–7.51 (2H, m), 5.38 (1H, t, *J* = 4.0 Hz), 3.11–3.20 (1H, m), 2.49–2.74 (3H, m)

**<sup>13</sup>C NMR (126 MHz, CDCl<sub>3</sub>) δ:** 196.3, 142.2, 134.1, 131.0, 129.3, 129.0, 127.3, 56.6, 33.9, 31.8

**IR (neat, cm<sup>-1</sup>) v:** 2959, 1687, 1599, 1455, 1285, 1234, 921, 881, 777, 720

**HRMS (ESI):** *m/z* calcd for C<sub>10</sub>H<sub>9</sub>ClONa [M+Na]<sup>+</sup> 203.0234, Found 203.0234

**(S)-3,7-dimethyloct-6-en-1-yl 4-nitrobenzoate (S1w)**

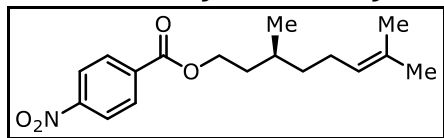

yellow liquid, *R*<sub>f</sub> = 0.60 (hexane/EtOAc = 5/1), [α]<sub>D</sub><sup>22</sup> = -1.9 (*c* = 1.45, MeOH)

**<sup>1</sup>H NMR (500 MHz, CDCl<sub>3</sub>) δ:** 8.27 (2H, d, *J* = 8.9 Hz), 8.19 (2H, d, *J* = 8.9 Hz), 5.07 (1H, t, *J* = 7.2 Hz), 4.34–4.46 (2H, m), 1.92–2.07 (2H, m), 1.78–1.87 (1H, m), 1.55–1.71 (2H, m), 1.65 (3H, s), 1.59 (3H, s), 1.34–1.44 (1H, m), 1.19–1.30 (1H, m), 0.97 (3H, d, *J* = 6.3 Hz)

**<sup>13</sup>C NMR (126 MHz, CDCl<sub>3</sub>) δ:** 164.6, 150.4, 135.8, 131.4, 130.6, 124.4, 123.4, 64.4, 36.8, 35.3, 29.5, 25.6, 25.3, 19.4, 17.6

**IR (neat, cm<sup>-1</sup>) v:** 2925, 1726, 1608, 1529, 1349, 1276, 1102, 719

**HRMS (ESI):** *m/z* calcd for C<sub>17</sub>H<sub>23</sub>NO<sub>4</sub>Na [M+Na]<sup>+</sup> 328.1519, Found 328.1523

**(S)-3-methyl-6-oxohexyl 4-nitrobenzoate (S2w)**

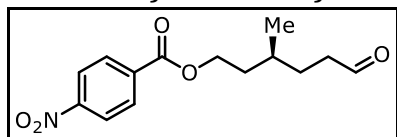

yellow liquid, *R*<sub>f</sub> = 0.48 (hexane/EtOAc = 2/1), [α]<sub>D</sub><sup>21</sup> = -3.9 (*c* = 2.17, MeOH)

**<sup>1</sup>H NMR (500 MHz, CDCl<sub>3</sub>) δ:** 9.77 (1H, s), 8.26 (2H, d, *J* = 8.0 Hz), 8.17 (2H, d, *J* = 8.0 Hz), 4.36–4.46 (2H, m), 2.42–2.55 (2H, m), 1.59–1.87 (4H, m), 1.47–1.56 (1H, m), 0.97 (3H, d, *J* = 6.3 Hz)

**<sup>13</sup>C NMR (126 MHz, CDCl<sub>3</sub>) δ:** 202.2, 164.6, 150.4, 135.6, 130.6, 123.5, 64.0, 41.4, 35.2, 29.5, 28.6, 19.1

**IR (neat, cm<sup>-1</sup>) v:** 2960, 2723, 1724, 1607, 1528, 1350, 1278, 1104, 875, 720

**HRMS (ESI):** *m/z* calcd for C<sub>14</sub>H<sub>17</sub>NO<sub>5</sub>Na [M+Na]<sup>+</sup> 302.0999, Found 302.0995

**(S)-4-methyl-6-((4-nitrobenzoyl)oxy)hexanoic acid (1w)**

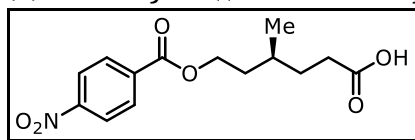

yellow solid, *R*<sub>f</sub> = 0.40 (hexane/EtOAc = 1/1), [α]<sub>D</sub><sup>21</sup> = 0 (*c* = 1.69, MeOH)

**<sup>1</sup>H NMR (400 MHz, CDCl<sub>3</sub>) δ:** 8.28 (2H, d, *J* = 8.5 Hz), 8.19 (2H, d, *J* = 8.5 Hz), 4.35–4.48 (2H, m), 2.31–2.50 (2H, m), 1.47–1.90 (5H, m), 0.99 (3H, d, *J* = 6.3 Hz)

**<sup>13</sup>C NMR (100 MHz, CDCl<sub>3</sub>) δ:** 180.0, 164.7, 150.4, 135.7, 130.6, 123.5, 64.0, 35.1, 31.5, 31.3, 29.3, 19.0

**IR (neat, cm<sup>-1</sup>) v:** 3112, 2961, 1723, 1608, 1528, 1350, 1277, 1103, 876, 719

**HRMS (ESI):** *m/z* calcd for C<sub>14</sub>H<sub>17</sub>NO<sub>6</sub>Na [M+Na]<sup>+</sup> 318.0948, Found 318.0938

**DL-4-chloro-4-methyl-6-((4-nitrobenzoyl)oxy)hexanoic acid (2w)**

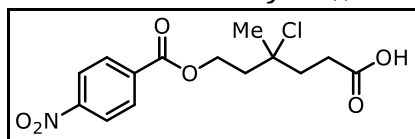

white solid,  $R_f = 0.32$  (hexane/EtOAc = 1/1)

**Yield:** 38.4 mg (0.3 mmol scale), 37%

**$^1\text{H}$  NMR (500 MHz,  $\text{CDCl}_3$ )  $\delta$ :** 8.28 (2H, d,  $J = 8.6$  Hz), 8.20 (2H, d,  $J = 8.6$  Hz), 4.63 (2H, t,  $J = 6.3$  Hz), 2.59–2.73 (2H, m), 2.10–2.36 (4H, m), 1.64 (3H, s)

**$^{13}\text{C}$  NMR (126 MHz,  $\text{CDCl}_3$ )  $\delta$ :** 178.9, 164.5, 150.5, 135.3, 130.7, 123.5, 70.3, 62.5, 42.3, 38.7, 29.7, 29.6

**IR (neat,  $\text{cm}^{-1}$ )  $\nu$ :** 3426, 1724, 1608, 1528, 1413, 1350, 1276, 1104, 874, 719

**HRMS (ESI):**  $m/z$  calcd for  $\text{C}_{14}\text{H}_{16}\text{ClNO}_6\text{Na}$   $[\text{M}+\text{Na}]^+$  352.0558, Found 352.0566

**DL-3-chloro-6-methoxy-3-methyl-6-oxohexyl 4-nitrobenzoate (2x)**

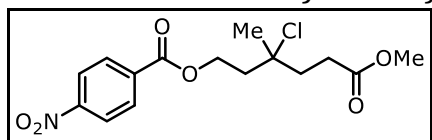

light yellow liquid,  $R_f = 0.50$  (hexane/EtOAc = 2/1)

**$^1\text{H}$  NMR (500 MHz,  $\text{CDCl}_3$ )  $\delta$ :** 8.28 (2H, d,  $J = 8.3$  Hz), 8.19 (2H, d,  $J = 8.3$  Hz), 4.60 (2H, t,  $J = 6.6$  Hz), 3.68 (3H, s), 2.52–2.63 (2H, m), 2.09–2.34 (4H, m), 1.61 (3H, s)

**$^{13}\text{C}$  NMR (100 MHz,  $\text{CDCl}_3$ )  $\delta$ :** 173.2, 164.4, 150.5, 135.3, 130.6, 123.5, 70.4, 62.4, 51.8, 42.2, 39.0, 29.58, 29.55

**IR (neat,  $\text{cm}^{-1}$ )  $\nu$ :** 2953, 1730, 1607, 1530, 1436, 1271, 1102, 874, 718

**HRMS (ESI):**  $m/z$  calcd for  $\text{C}_{15}\text{H}_{18}\text{ClNO}_6\text{Na}$   $[\text{M}+\text{Na}]^+$  366.0715, Found 366.0706

## 10. NMR spectra

A  $^1\text{H}$  NMR spectrum for  $\text{Ag}(\text{phen})_2\text{OTf}$ , and  $^1\text{H}$  and  $^{13}\text{C}$  NMR spectra for the compounds in **9**. Analytical data are appended below.

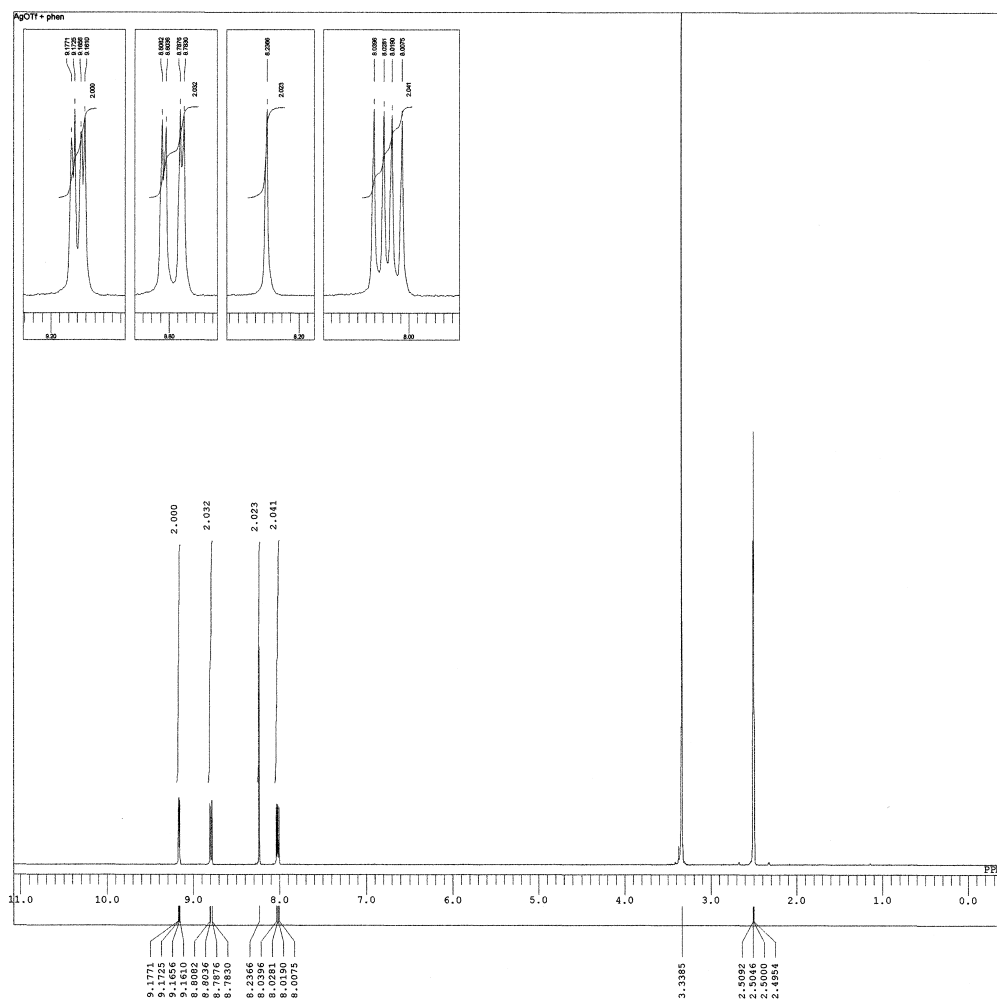

DFILE ozawa08-002.C.jdf  
 COMNT AgOTf + phen  
 DATIM 24-08-2015 15:11:50  
 CNUC 1H  
 EXMOD proton.jxp  
 OBFRQ 391.78 MHz  
 OBSE 8.51 KHz  
 OBFIN 3.34 Hz  
 POINT 16384  
 FREQ 7352.94 Hz  
 SCANS 9  
 ACQTM 2.2282 sec  
 PD 5.0000 sec  
 PW 4.99 usec  
 IRNUC 1H  
 CTMP  
 SUNT DMSO 21.7 c  
 EXRF 2.50 ppm  
 BF 0.12 Hz  
 RGAIN 44

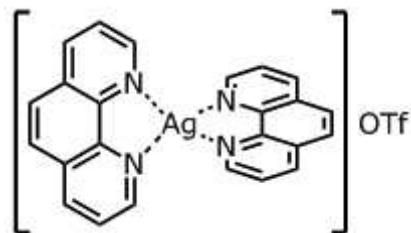

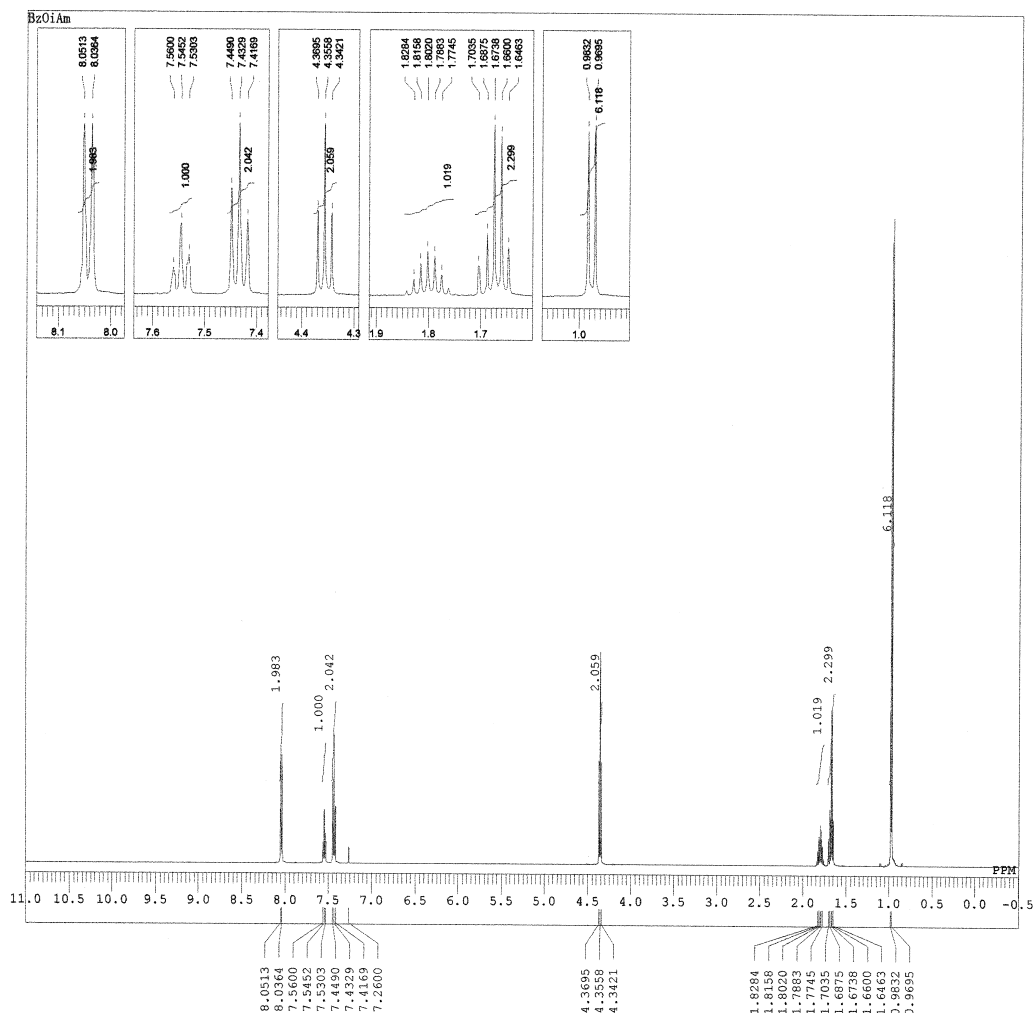

```

DFILE  BzOiAm_1H.jdf
COMNT  BzOiAm
DATIM  2015-08-25 12:38:32
OBNUC  1H
EXMOD  proton.jxp
OBFRQ  500.16 MHz
OBSET  2.41 KHz
OBFIN  6.01 Hz
POINT  16384
FREQU  9384.38 Hz
SCANS  4
AQTM  1.7459 sec
PD  5.0000 sec
FW1  5.55 usec
IRNUC  1H
CTEMP  21.2 c
SLVNT  CDCL3
EXREF  7.26 ppm
BF  0.12 Hz
RGAIN  30
  
```

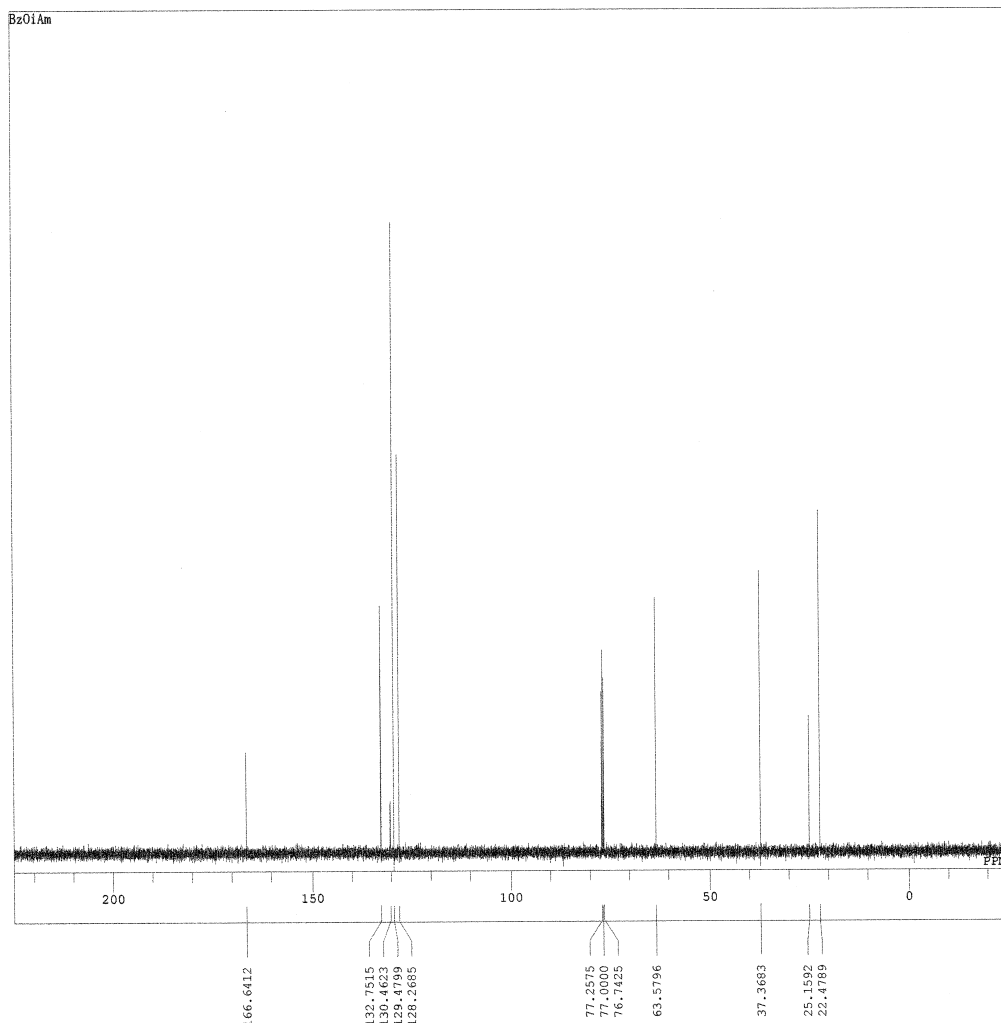

```

DFILE  BzOiAm_13C.jdf
COMNT  BzOiAm
DATIM  2015-08-25 12:39:35
OBNUC  13C
EXMOD  carbon.jxp
OBFRQ  125.77 MHz
OBSET  7.87 KHz
OBFIN  4.21 Hz
POINT  32767
FREQU  39308.18 Hz
SCANS  20
AQTM  0.8336 sec
PD  2.0000 sec
FW1  3.40 usec
IRNUC  1H
CTEMP  21.4 c
SLVNT  CDCL3
EXREF  77.00 ppm
BF  0.12 Hz
RGAIN  60
  
```

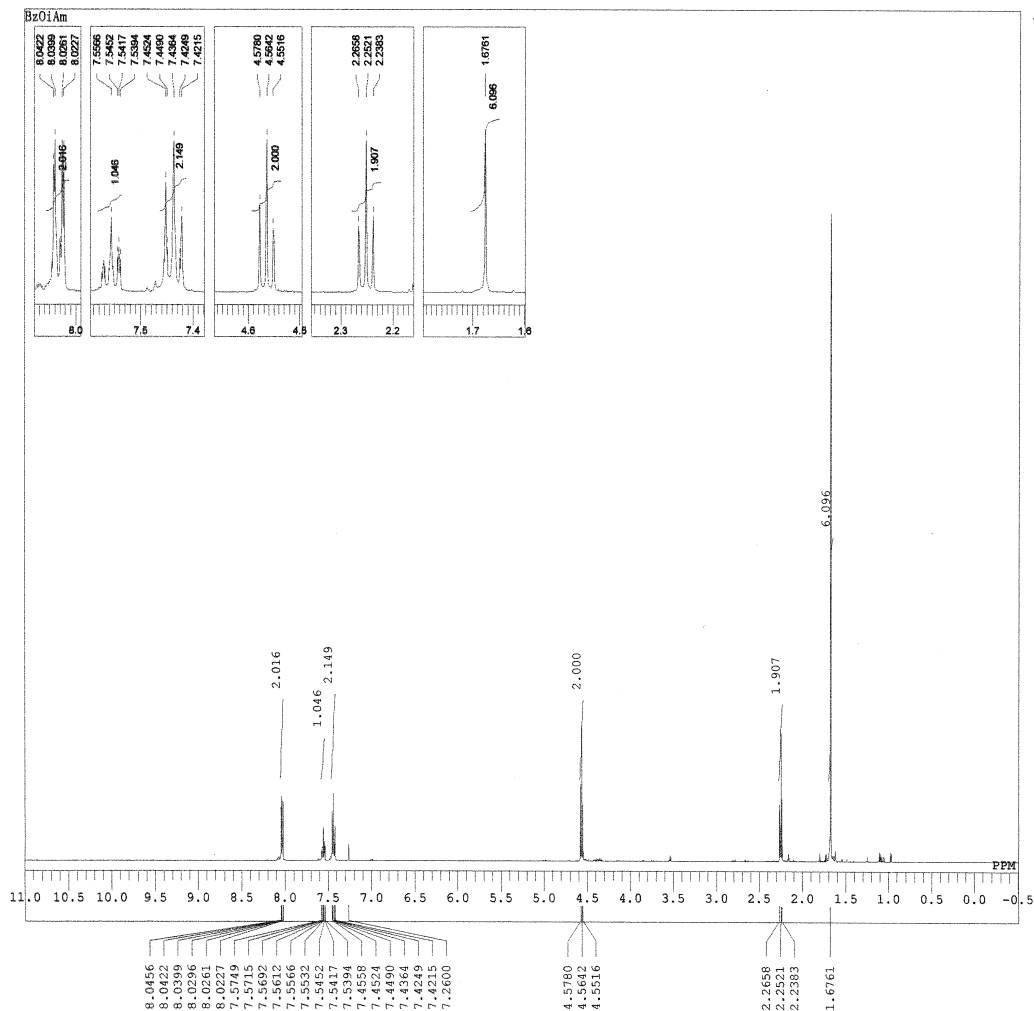

DFILE ozawa08-072\_1h.jdf  
 COMNT BzOIAm  
 DATIM 2015-08-24 12:48:46  
 OBNUC 1H  
 EXMOD proton.jxp  
 OBFRQ 500.16 MHz  
 OBSET 2.41 KHz  
 OBFIN 6.01 Hz  
 POINT 16384  
 FREQU 9384.38 Hz  
 SCANS 4  
 ACQTM 1.7459 sec  
 PD 5.0000 sec  
 FW1 5.55 usec  
 IRNUC 1H  
 CTEMP 21.2 c  
 SLVNT CDCL3  
 EXREF 7.26 ppm  
 BF 0.12 Hz  
 RGAIN 30

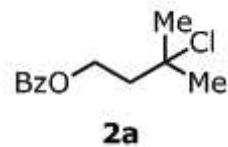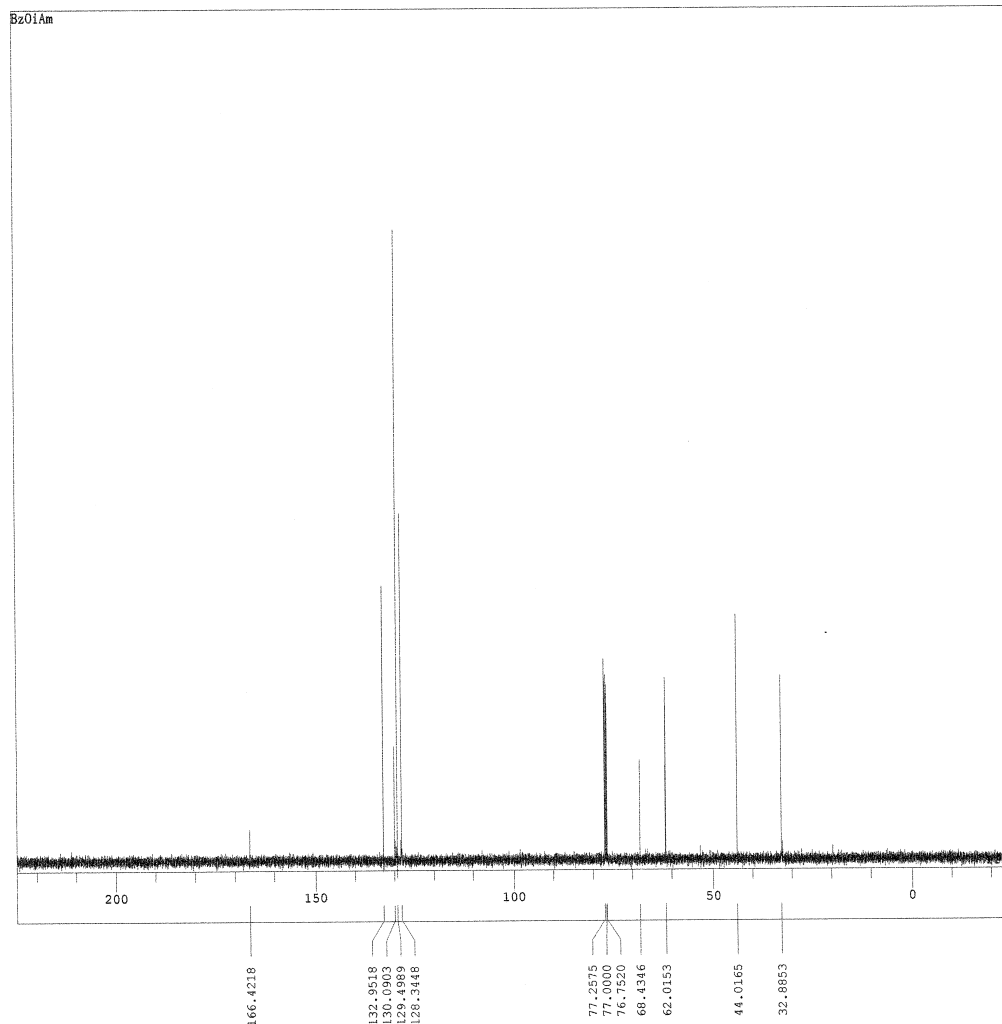

DFILE ozawa08-072\_13c.jdf  
 COMNT BzOIAm  
 DATIM 2015-08-24 12:49:49  
 OBNUC 13C  
 EXMOD carbon.jxp  
 OBFRQ 125.77 MHz  
 OBSET 7.87 KHz  
 OBFIN 4.21 Hz  
 POINT 32767  
 FREQU 39308.18 Hz  
 SCANS 32  
 ACQTM 0.8336 sec  
 PD 2.0000 sec  
 FW1 3.40 usec  
 IRNUC 1H  
 CTEMP 21.4 c  
 SLVNT CDCL3  
 EXREF 77.00 ppm  
 BF 0.12 Hz  
 RGAIN 60

BzOBu

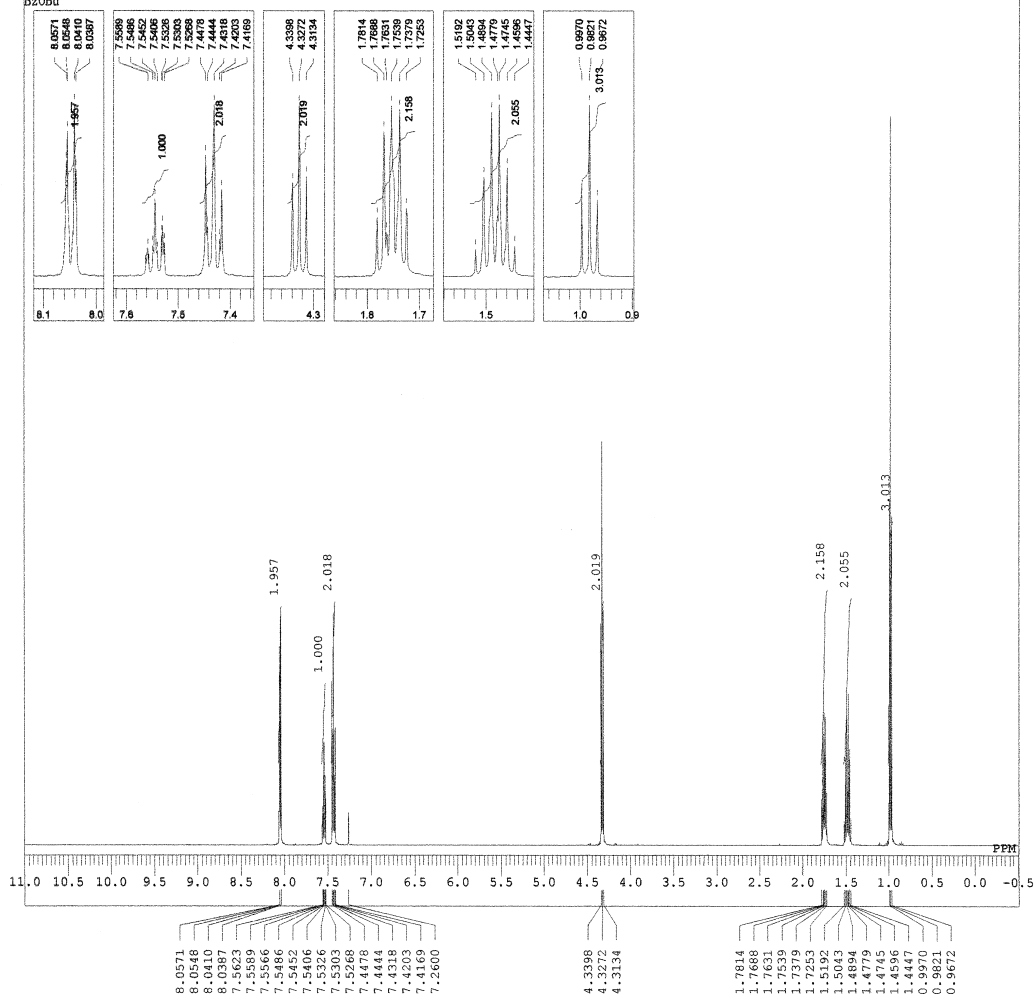

DFILE BzOBu\_1H.jdf  
 COMNT BzOBu  
 DATIM 2015-09-28 15:14:10  
 OBNUC 1H  
 EXMOD proton.jxp  
 OBFRQ 500.16 MHz  
 OBSET 2.41 KHz  
 OBFIN 6.01 Hz  
 POINT 16384  
 FREQU 9384.38 Hz  
 SCANS 4  
 ACQTM 1.7459 sec  
 PD 5.0000 sec  
 FW1 5.55 usec  
 IRNUC 1H  
 CTEMP 22.8 c  
 SLVNT CDCL3  
 EXREF 7.26 ppm  
 BF 0.12 Hz  
 RGAIN 28

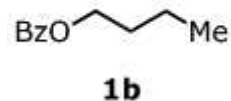

BzOBu

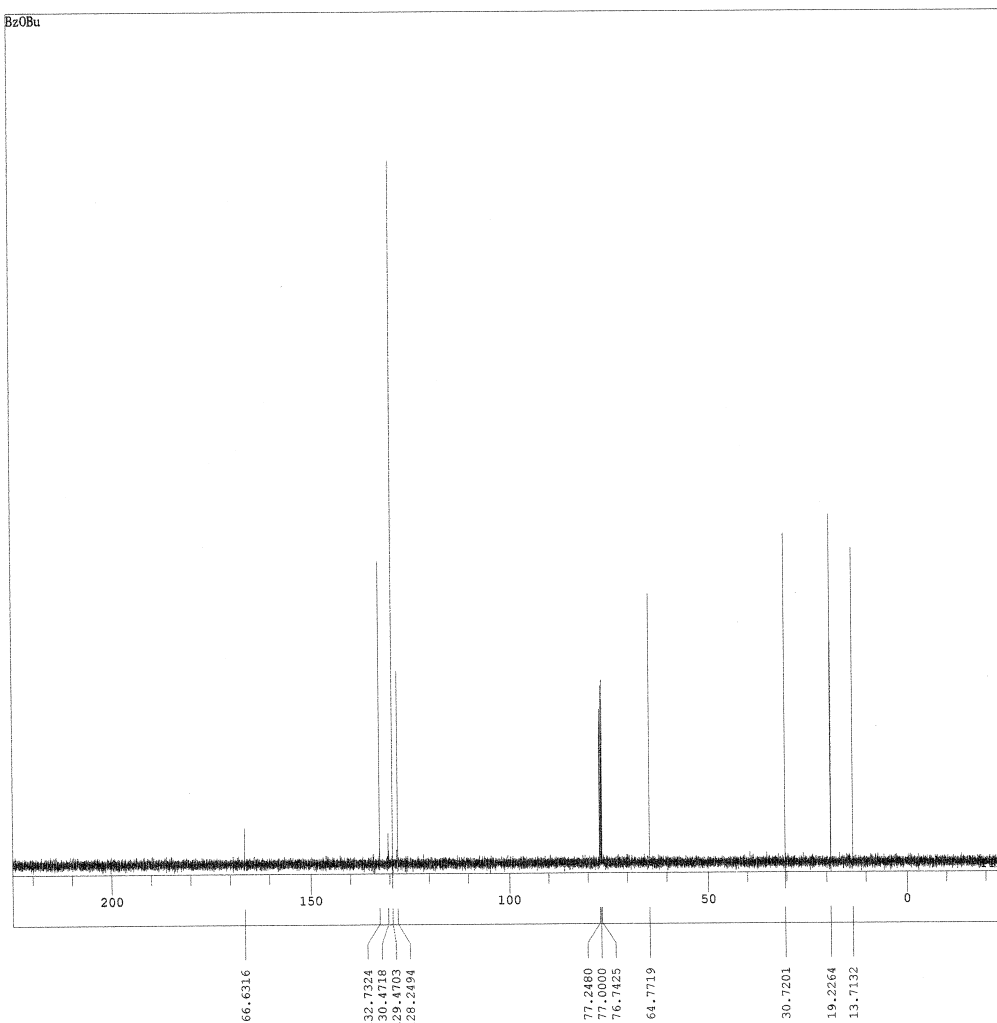

DFILE BzOBu\_13C.jdf  
 COMNT BzOBu  
 DATIM 2015-09-28 15:15:13  
 OBNUC 13C  
 EXMOD carbon.jxp  
 OBFRQ 125.77 MHz  
 OBSET 7.87 KHz  
 OBFIN 4.21 Hz  
 POINT 32767  
 FREQU 39308.18 Hz  
 SCANS 28  
 ACQTM 0.8336 sec  
 PD 2.0000 sec  
 FW1 3.40 usec  
 IRNUC 1H  
 CTEMP 22.5 c  
 SLVNT CDCL3  
 EXREF 77.00 ppm  
 BF 0.12 Hz  
 RGAIN 60

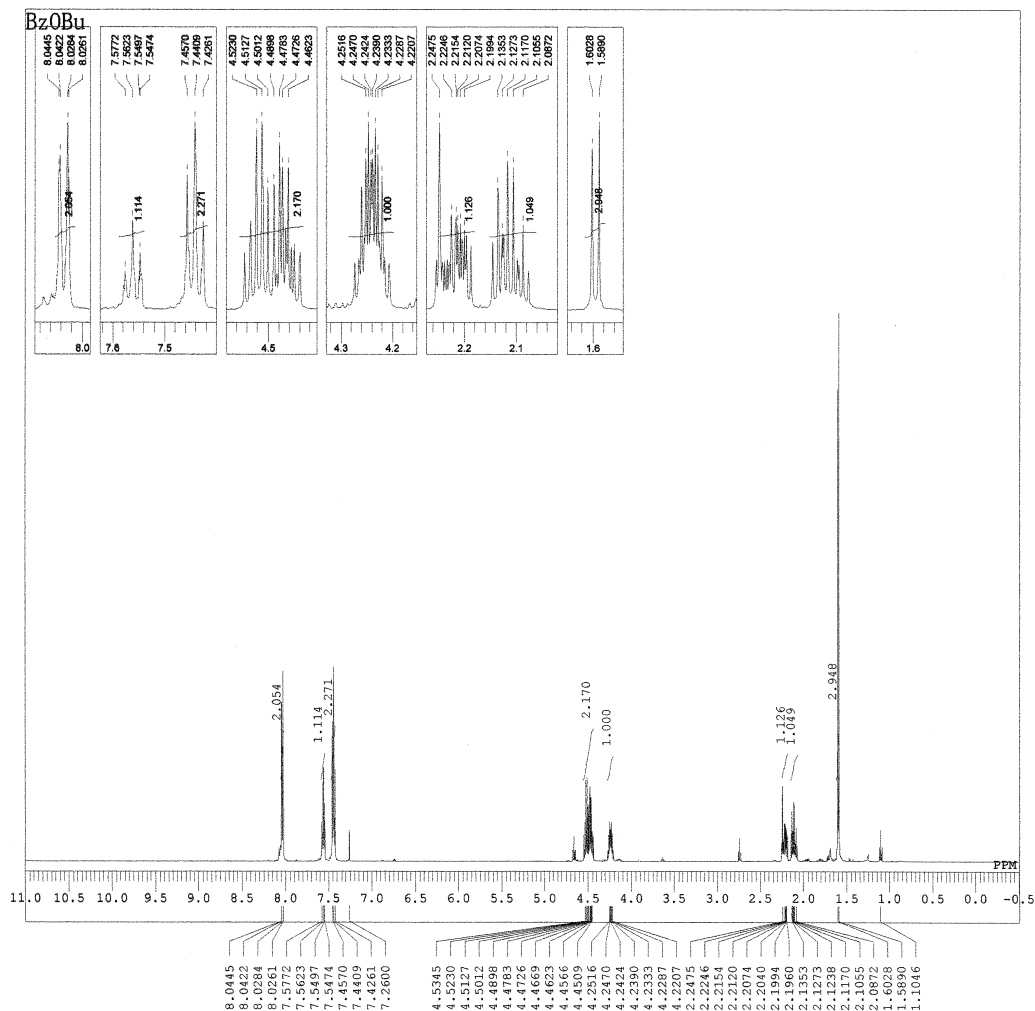

DFILE ozawa08-141\_1h.jdf  
 COMNT BzOBu  
 DATIM 2015-09-29 12:04:07  
 OBNUC 1H  
 EXMOD proton.jxp  
 OBFRQ 500.16 MHz  
 OBSET 2.41 KHz  
 OBFIN 6.01 Hz  
 POINT 16384  
 FREQU 9384.38 Hz  
 SCANS 4  
 ACQTM 1.7459 sec  
 PD 5.0000 sec  
 PW1 5.55 usec  
 IRNUC 1H  
 CTEMP 21.8 c  
 SLVMT CDCL3  
 EXREF 7.26 ppm  
 BF 0.12 Hz  
 RGAIN 30

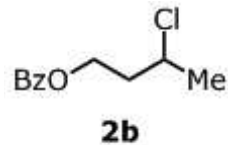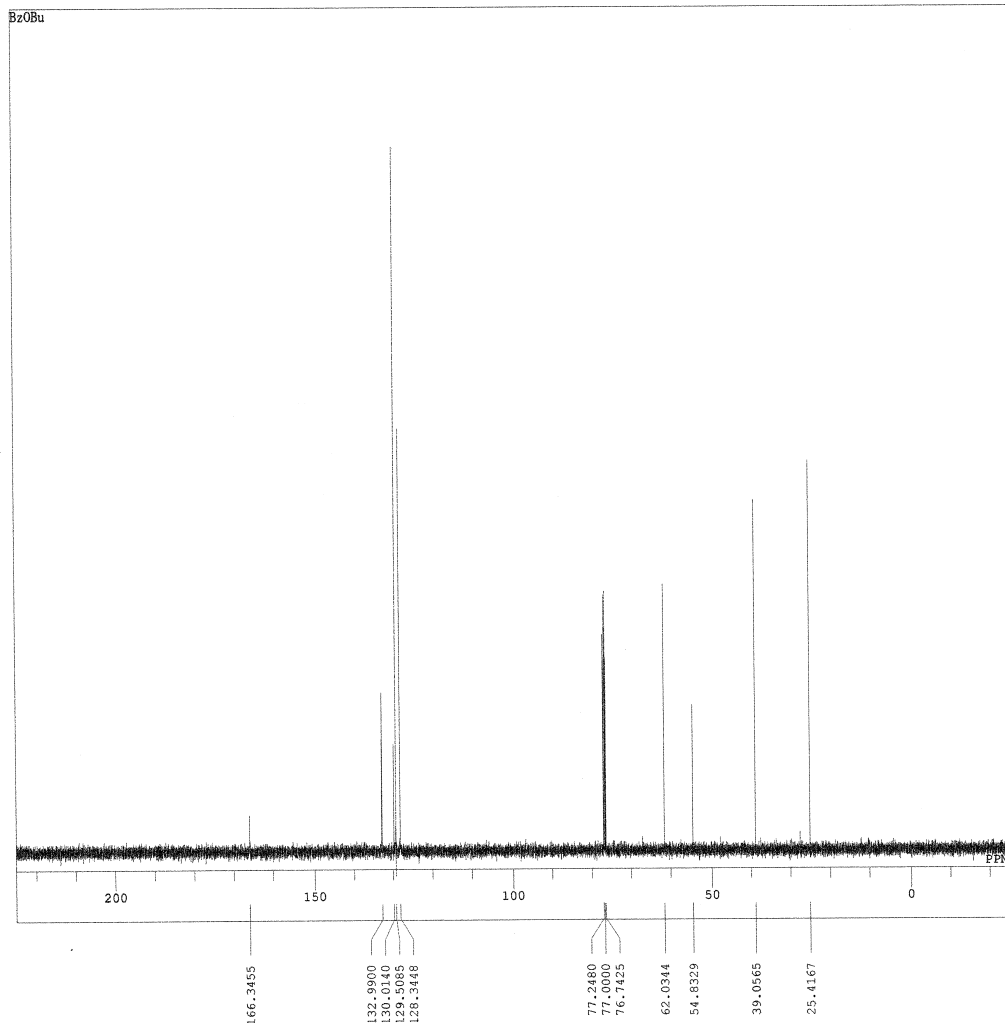

DFILE ozawa08-141\_13c.jdf  
 COMNT BzOBu  
 DATIM 2015-09-29 12:05:09  
 OBNUC 13C  
 EXMOD carbon.jxp  
 OBFRQ 125.77 MHz  
 OBSET 7.87 KHz  
 OBFIN 4.21 Hz  
 POINT 32767  
 FREQU 39308.18 Hz  
 SCANS 40  
 ACQTM 0.8336 sec  
 PD 2.0000 sec  
 PW1 3.40 usec  
 IRNUC 1H  
 CTEMP 21.9 c  
 SLVMT CDCL3  
 EXREF 77.00 ppm  
 BF 0.12 Hz  
 RGAIN 60

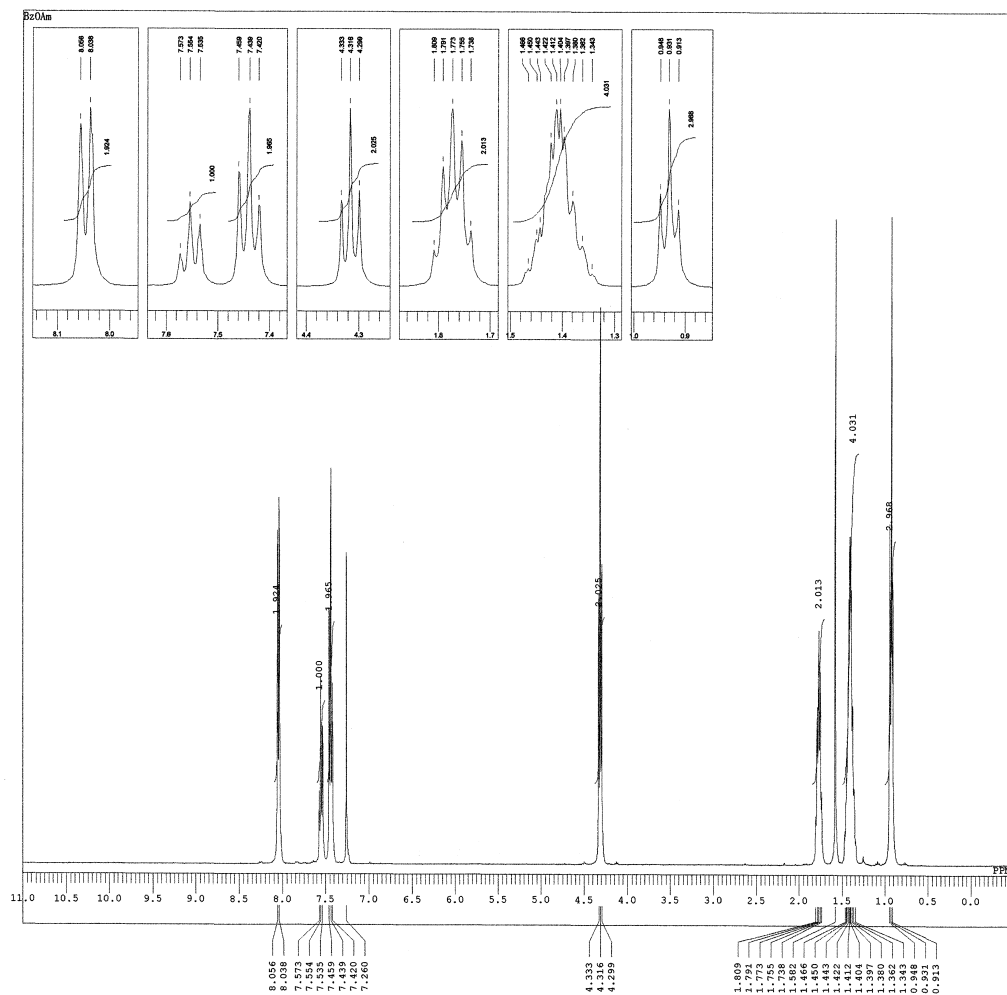

DFILE ozawa08-138\_18.als  
 COMNT BzOAm  
 DATIM 25-09-2015 15:54:13  
 OBNUC 1H  
 EXMOD proton.jpg  
 OBFO 391.70 MHz  
 OBSET 8.51 KHz  
 OBFIN 3.34 Hz  
 POINT 13107  
 FREQU 5882.35 Hz  
 SCANS 4  
 ACQTM 2.2282 sec  
 PD 5.0000 sec  
 FWI 4.99 usec  
 IRNUC 1H  
 CTMP 20.4 c  
 SLVNT CDCL3  
 EXREF 7.26 ppm  
 RF 1.20 Hz  
 RGAIN 40

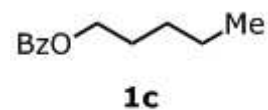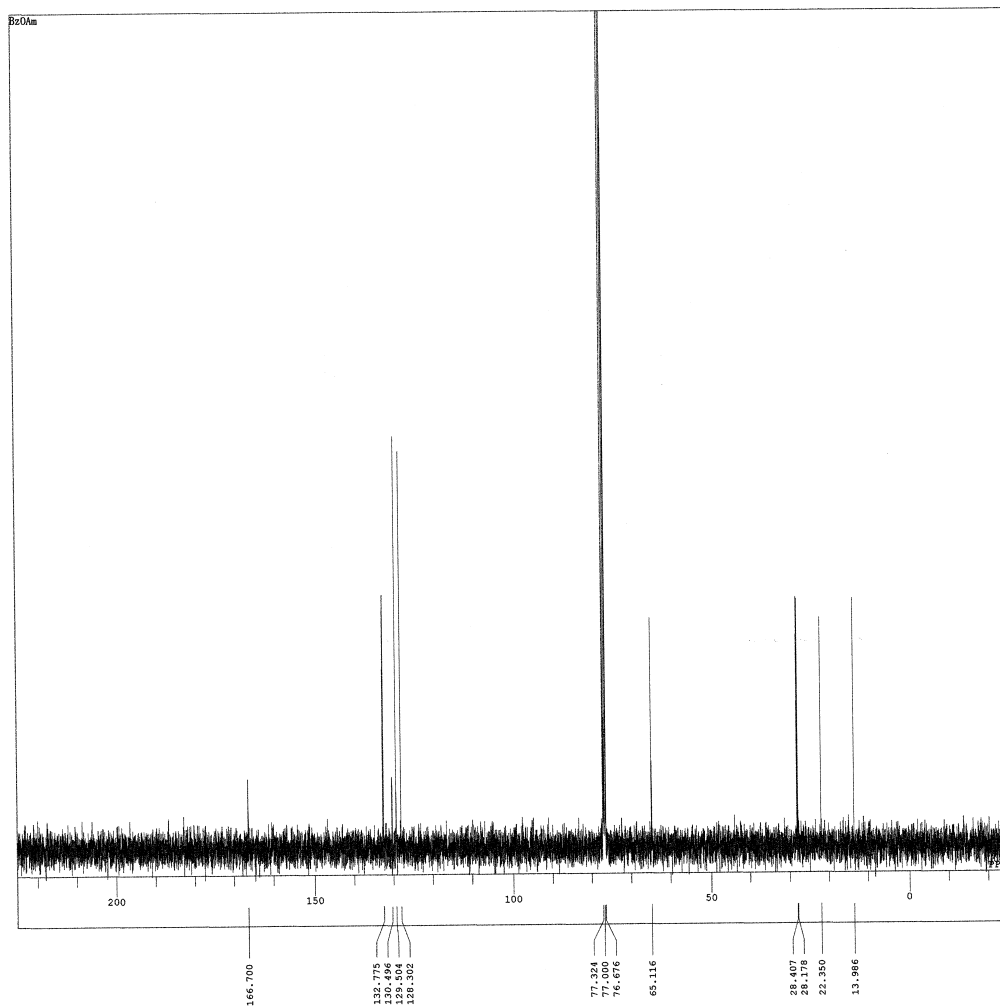

DFILE ozawa08-138\_13C.jdf  
 COMNT BzOAm  
 DATIM 25-09-2015 16:08:53  
 OBNUC 13C  
 EXMOD carbon.jpg  
 OBFO 98.52 MHz  
 OBSET 4.64 KHz  
 OBFIN 8.74 Hz  
 POINT 32767  
 FREQU 30788.18 Hz  
 SCANS 128  
 ACQTM 1.0643 sec  
 PD 2.0000 sec  
 FWI 3.16 usec  
 IRNUC 13H  
 CTMP 20.5 c  
 SLVNT CDCL3  
 EXREF 77.00 ppm  
 RF 1.20 Hz  
 RGAIN 60



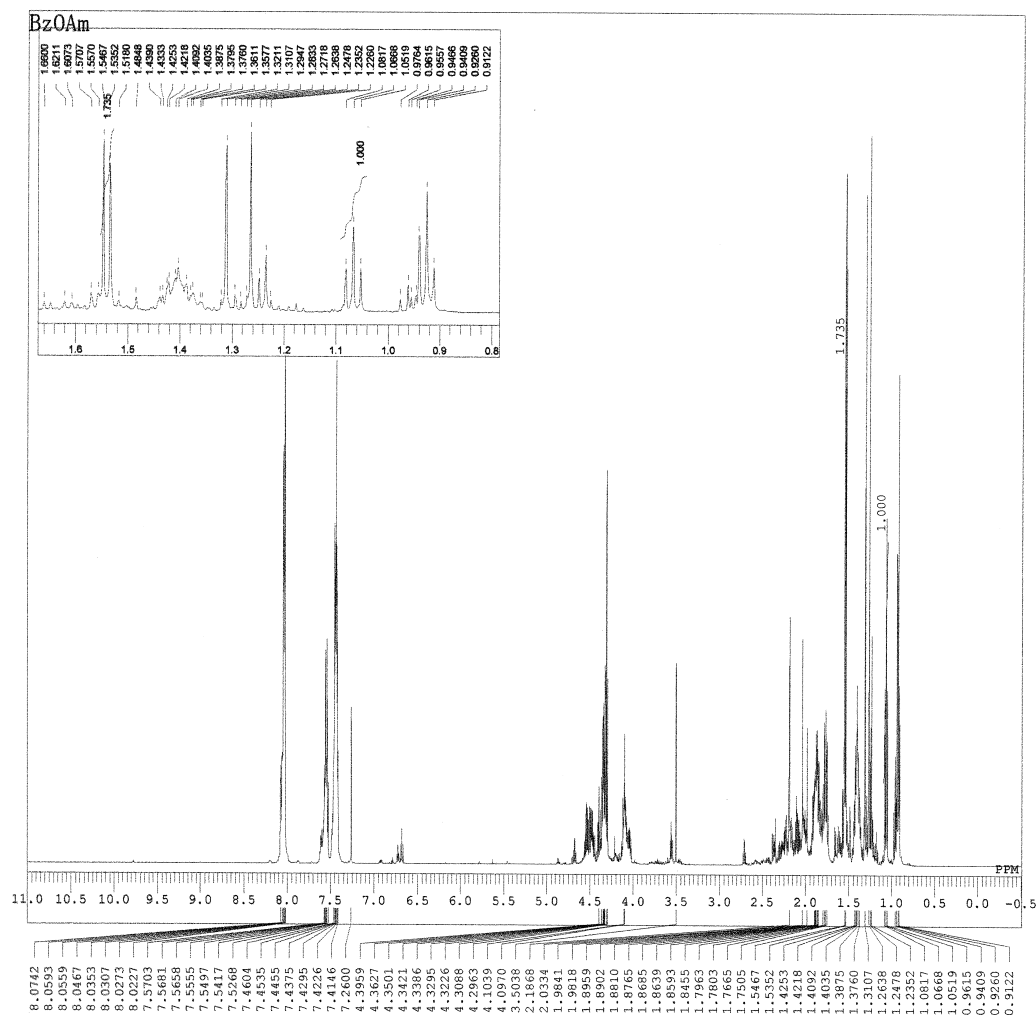

DFILE ozawa08-147\_C.jdf  
 COMMT BzOAm  
 DATIM 2015-10-03 10:00:22  
 OBNUC 1H  
 EXMOD proton.jxp  
 OBFRQ 500.16 MHz  
 OBSET 2.41 KHz  
 OBFIN 6.01 Hz  
 POINT 16394  
 FREQU 9384.38 Hz  
 SCANS 8  
 ACQTM 1.7459 sec  
 PD 5.0000 sec  
 PW1 5.55 usec  
 IRNUC 1H  
 CTEMP 33.3 c  
 SLVNT CDCL3  
 EXREF 7.26 ppm  
 BF 0.12 Hz  
 RGAIN 28

<sup>1</sup>H NMR of crude mixture.

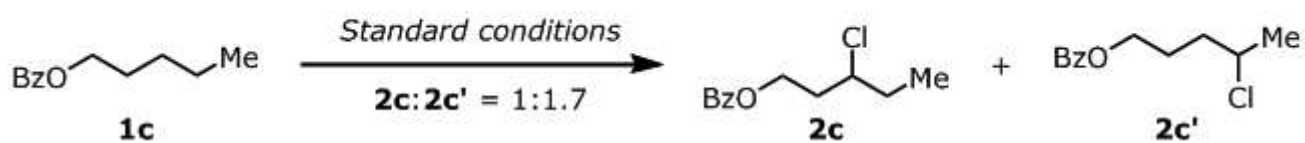

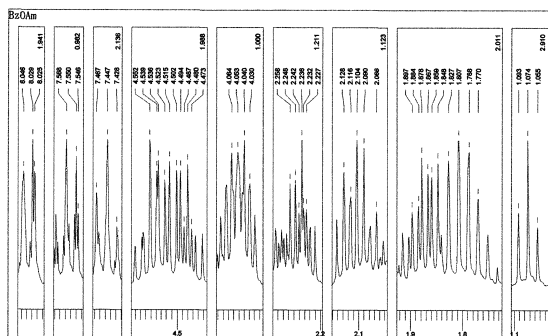

DFILE ozawa08-142a\_1H.jdf  
 COMNT BzOAm  
 DATIM 01-10-2015 16:54:01  
 OBNUC 1H  
 EXMOD proton.jxp  
 OBFRQ 391.76 MHz  
 OBSST 8.51 MHz  
 OBFIN 3.34 Hz  
 POINT 16384  
 FREQU 7352.94 Hz  
 SCANS 4  
 ACQTM 2.2282 sec  
 PD 5.0000 sec  
 FWH 4.39 usec  
 IRNUC 1H  
 CTIMP 20.4 c  
 SLVNT CDCL3  
 EXREF 7.26 ppm  
 BF 0.12 Hz  
 RGAIN 34

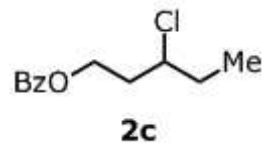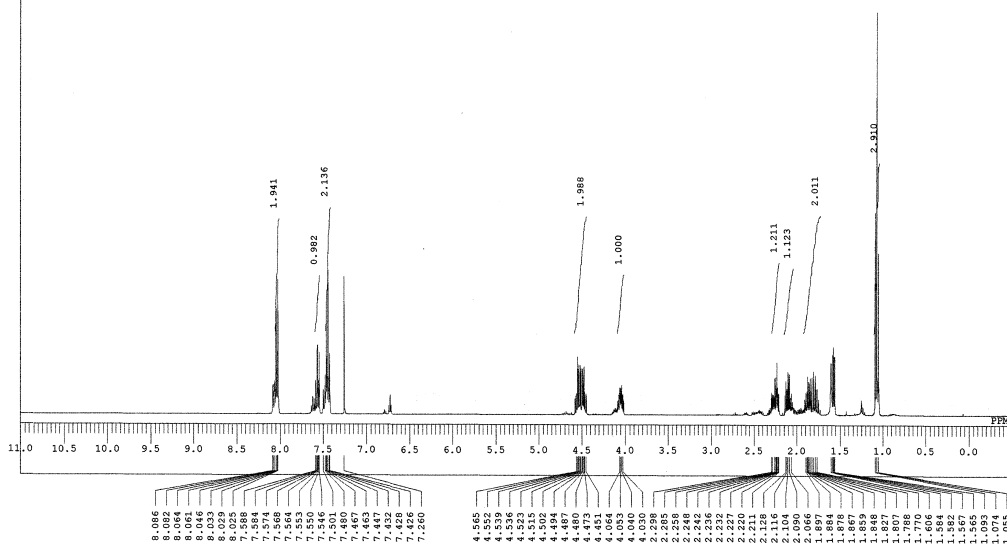

DFILE ozawa08-142a\_13C.als  
 COMNT BzOAm  
 DATIM 01-10-2015 16:55:04  
 OBNUC 13C  
 EXMOD carbon.jxp  
 OBFRQ 98.52 MHz  
 OBSST 4.64 KHz  
 OBFIN 8.74 Hz  
 POINT 26214  
 FREQU 24630.34 Hz  
 SCANS 64  
 ACQTM 1.0643 sec  
 PD 2.0000 sec  
 FWH 3.16 usec  
 IRNUC 1H  
 CTIMP 20.6 c  
 SLVNT CDCL3  
 EXREF 77.00 ppm  
 BF 0.12 Hz  
 RGAIN 60

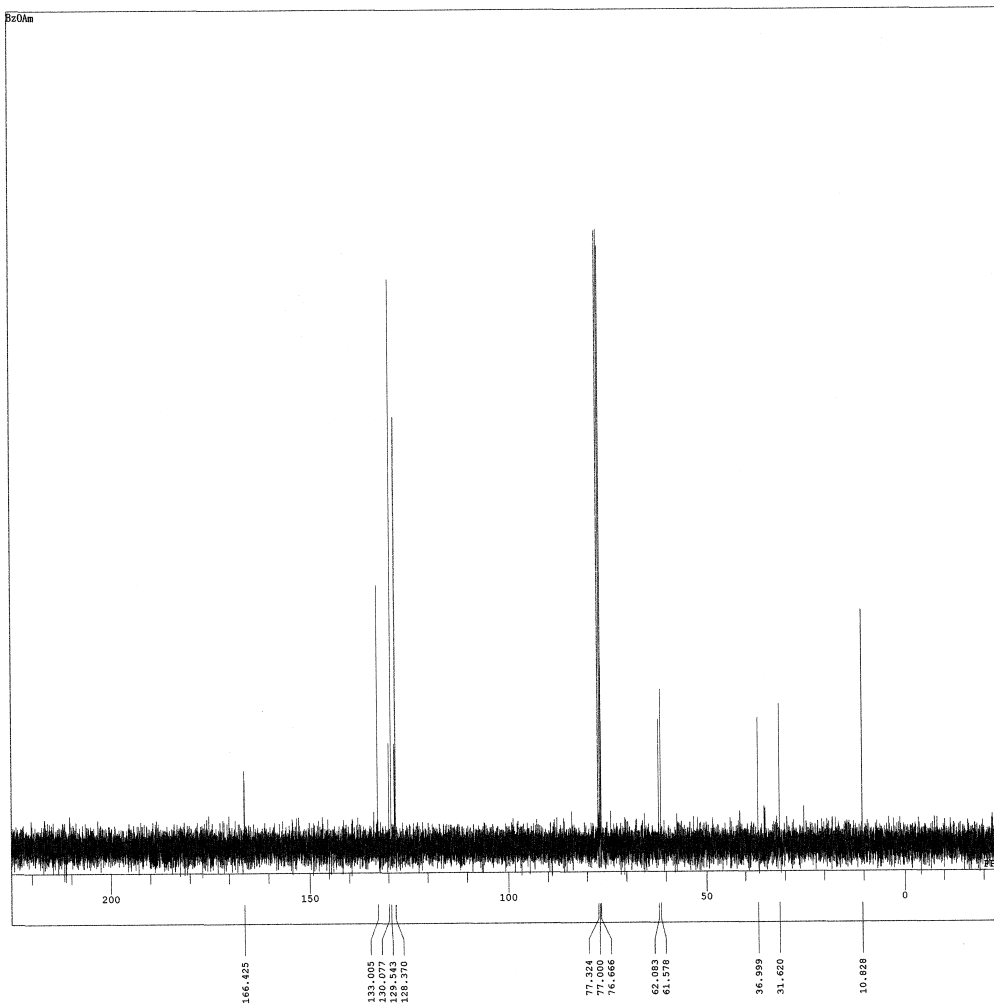

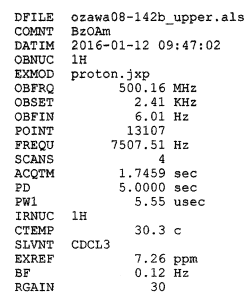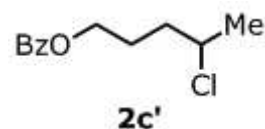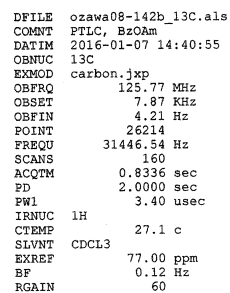

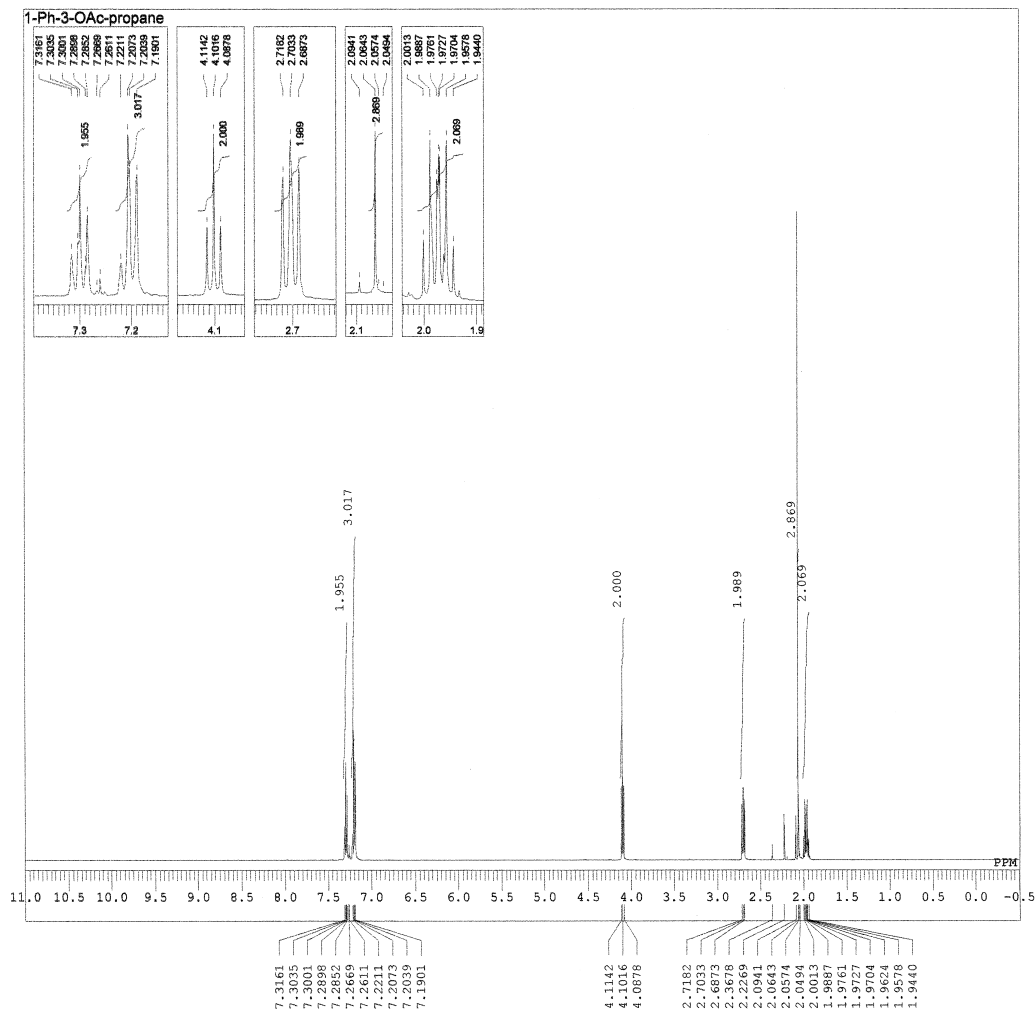

DFILE ozawa07-149\_1H.jdf  
 COMNT 1-Ph-3-OAc-propane  
 DATIM 2015-08-26 10:11:46  
 OBNUC 1H  
 EXMOD proton.jxp  
 OBFRQ 500.16 MHz  
 OBSET 2.41 KHz  
 OBFIN 6.01 Hz  
 POINT 16384  
 FREQU 9384.38 Hz  
 SCANS 4  
 ACQTM 1.7459 sec  
 PD 5.0000 sec  
 PW1 5.55 usec  
 IRNUC 1H  
 CTEMP 21.4 c  
 SLVNT CDCL3  
 EXREF 7.26 ppm  
 BF 0.12 Hz  
 RGAIN 30

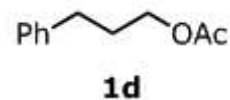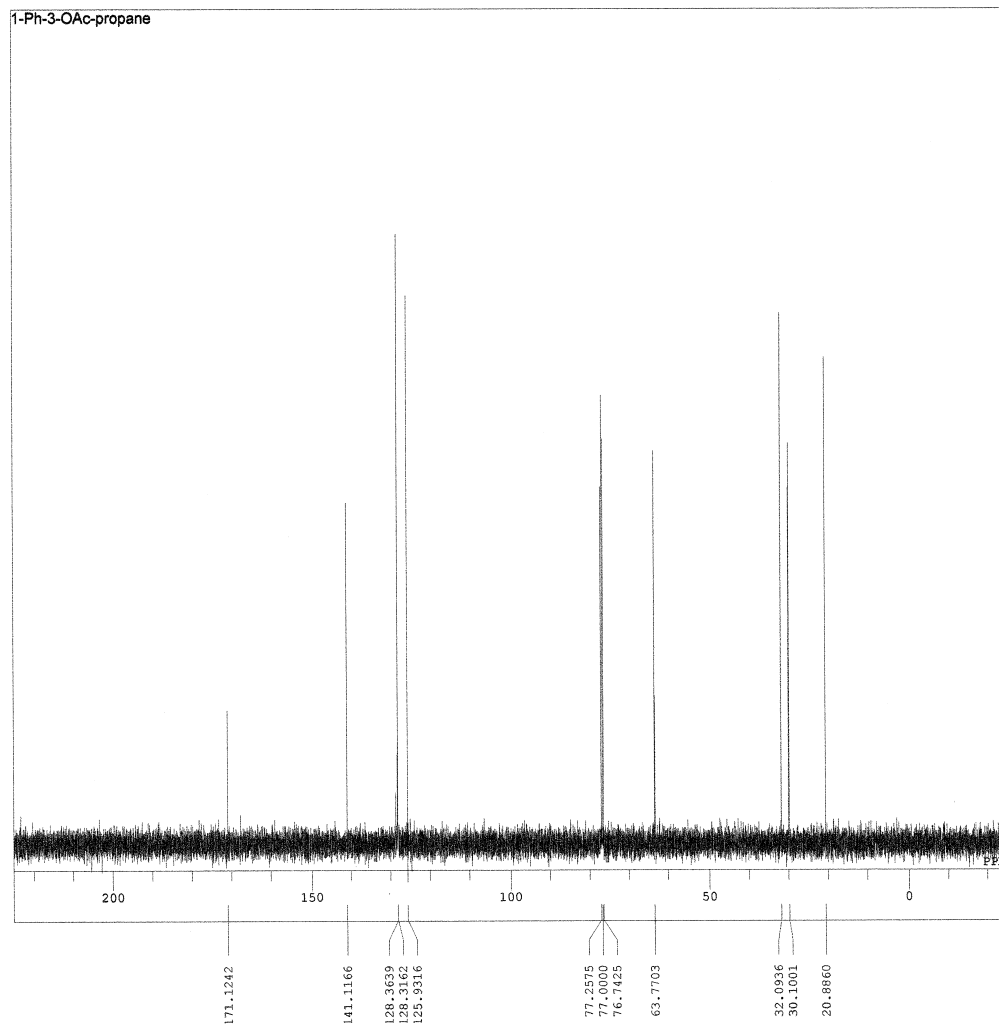

DFILE ozawa07-149\_13C.jdf  
 COMNT 1-Ph-3-OAc-propane  
 DATIM 2015-08-26 10:12:50  
 OBNUC 13C  
 EXMOD carbon.jxp  
 OBFRQ 125.77 MHz  
 OBSET 7.87 KHz  
 OBFIN 4.21 Hz  
 POINT 32767  
 FREQU 39308.18 Hz  
 SCANS 16  
 ACQTM 0.8336 sec  
 PD 2.0000 sec  
 PW1 3.40 usec  
 IRNUC 1H  
 CTEMP 21.5 c  
 SLVNT CDCL3  
 EXREF 77.00 ppm  
 BF 0.12 Hz  
 RGAIN 60

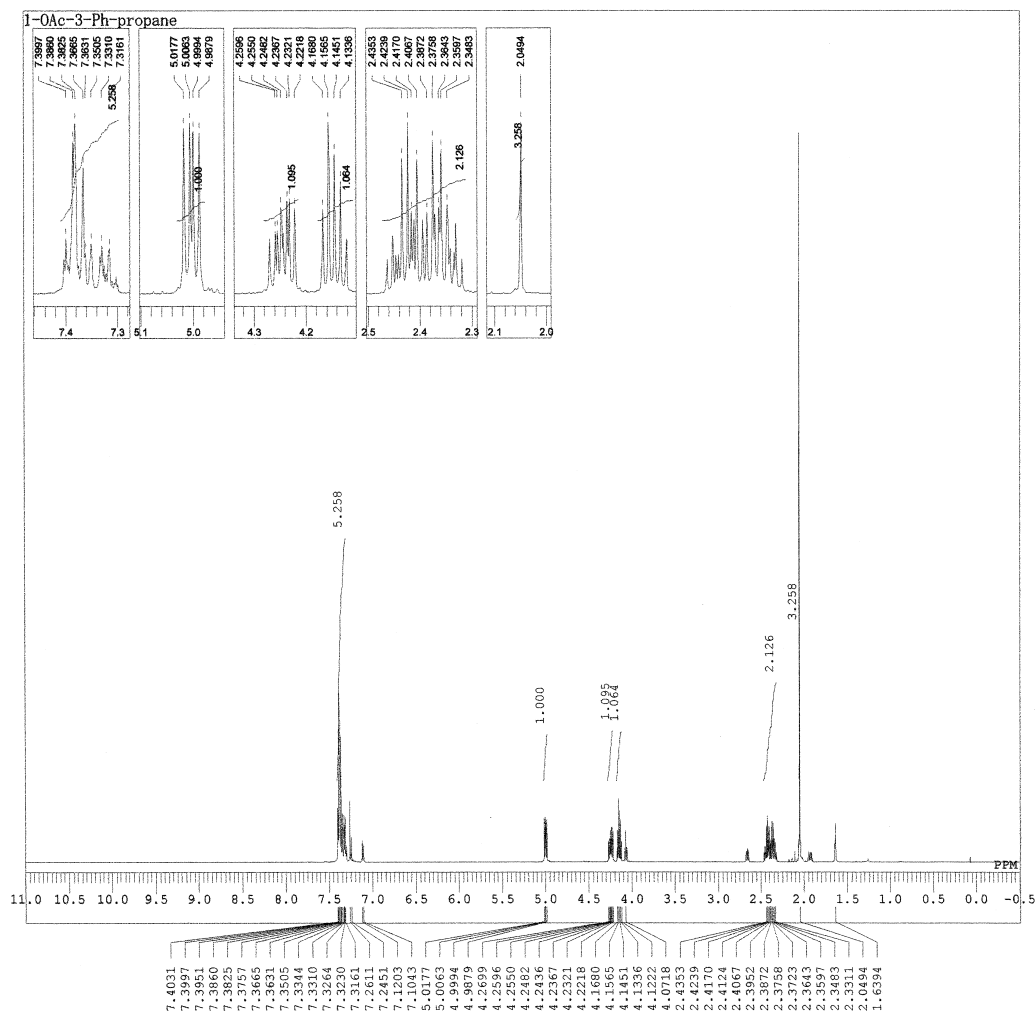

DFILE ozawa08-133\_1H.jdf  
 COMNT 1-OAc-3-Ph-propane  
 DATIM 2015-09-26 13:00:35  
 OBNUC 1H  
 EXMOD proton.jxp  
 OBFREQ 500.16 MHz  
 OBSSET 2.41 KHz  
 OBFIN 6.01 Hz  
 POINT 16384  
 FREQU 9384.38 Hz  
 SCANS 4  
 ACQTM 1.7459 sec  
 PD 5.0000 sec  
 FW1 5.55 usec  
 IRNUC 1H  
 CTEMP 22.9 c  
 SLVNT CDCL3  
 EXREF 7.26 ppm  
 BF 0.12 Hz  
 RGAIN 30

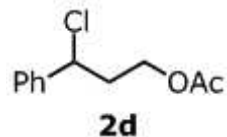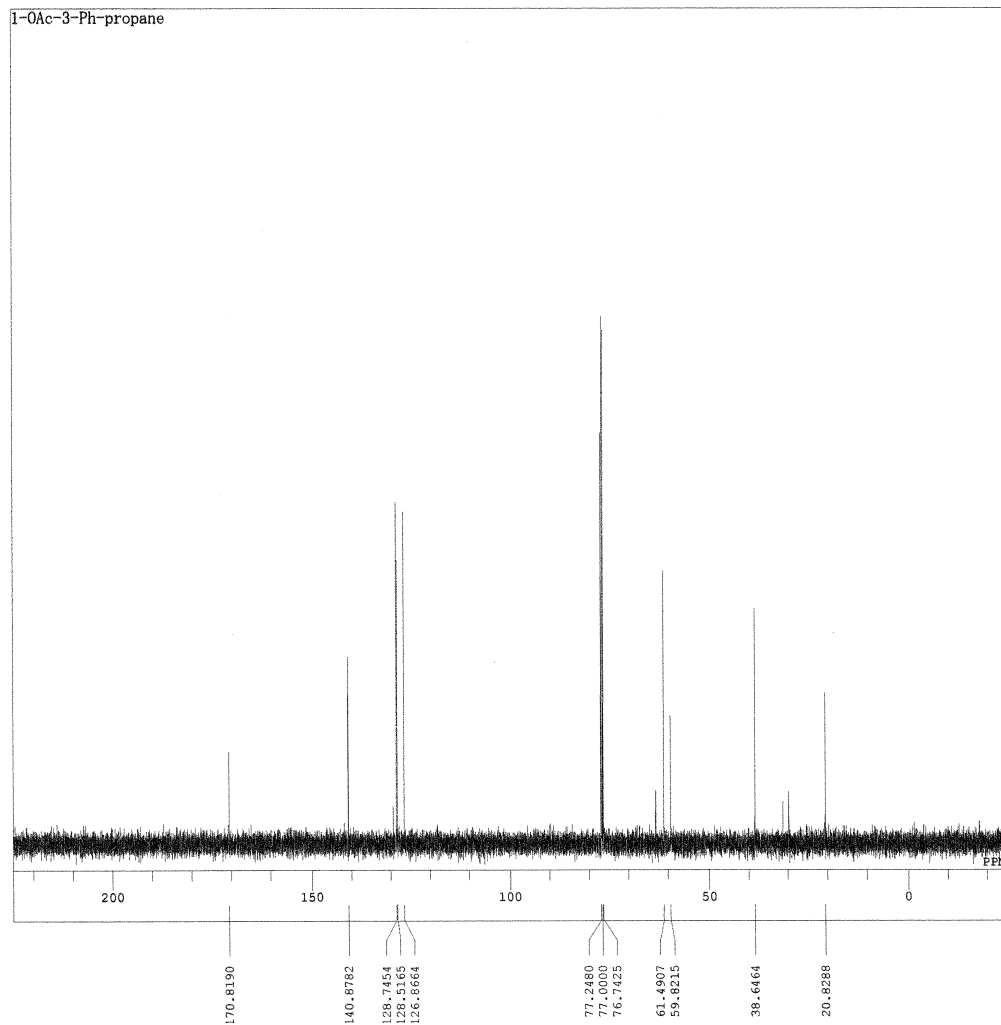

DFILE ozawa06-133\_13C.jdf  
 COMNT 1-OAc-3-Ph-propane  
 DATIM 2015-09-26 13:01:37  
 OBNUC 13C  
 EXMOD carbon.jxp  
 OBFREQ 125.77 MHz  
 OBSSET 7.87 KHz  
 OBFIN 4.21 Hz  
 POINT 32767  
 FREQU 39308.18 Hz  
 SCANS 48  
 ACQTM 0.8336 sec  
 PD 2.0000 sec  
 FW1 3.40 usec  
 IRNUC 1H  
 CTEMP 22.7 c  
 SLVNT CDCL3  
 EXREF 77.00 ppm  
 BF 0.12 Hz  
 RGAIN 60

1-Br-3-Ph-propane

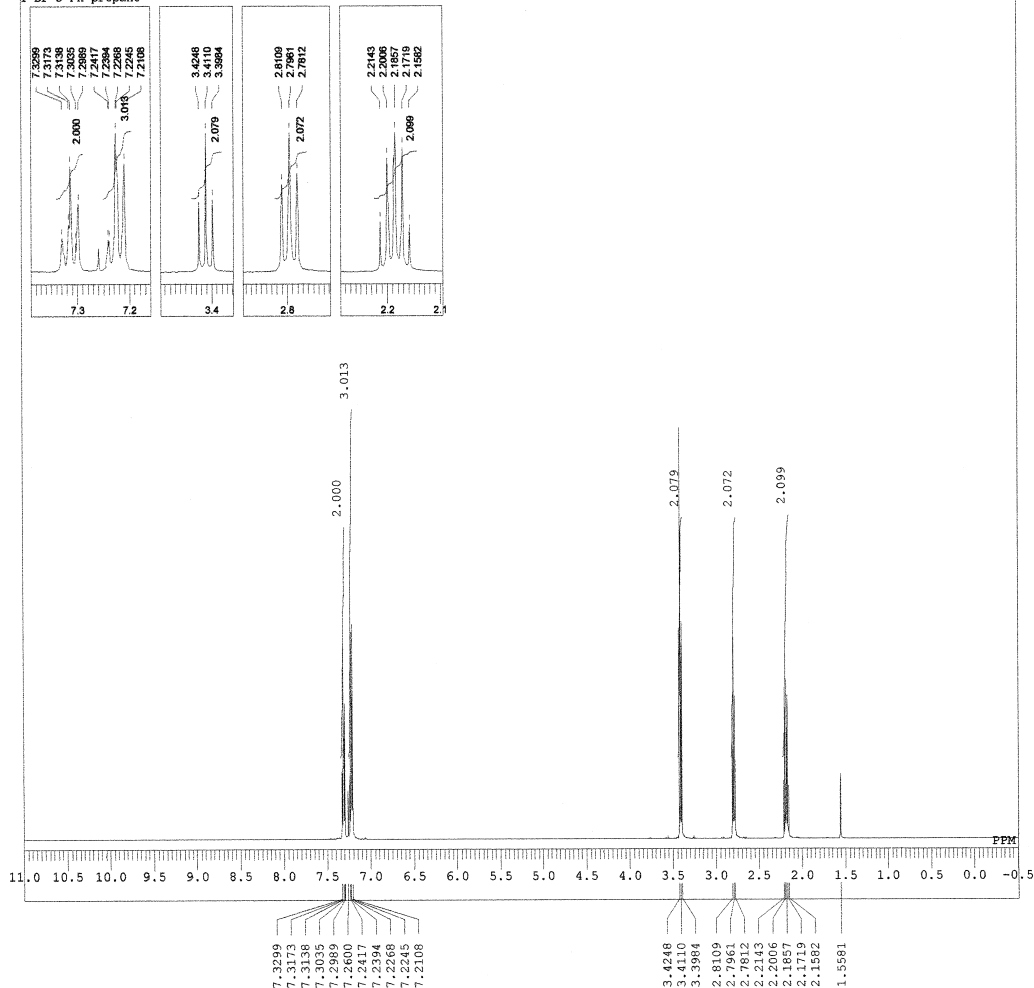

DFILE 1-Br-3-Ph-propane\_1H.jdf  
 COMNT 1-Br-3-Ph-propane  
 DATIM 2015-08-28 12:41:51  
 OBNUC 1H  
 EXMOD proton.jxp  
 OBFREQ 500.16 MHz  
 OBSSET 2.41 KHz  
 OBFIN 6.01 Hz  
 POINT 16384  
 FREQU 9384.38 Hz  
 SCANS 4  
 ACQTM 1.7459 sec  
 PD 5.0000 sec  
 PW1 5.55 usec  
 IRNUC 1H  
 CTEMP 21.7 c  
 SLVNT CDCL3  
 EXREF 7.26 ppm  
 BP 0.12 Hz  
 RGAIN 30

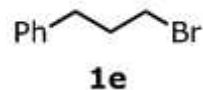

1-Br-3-Ph-propane

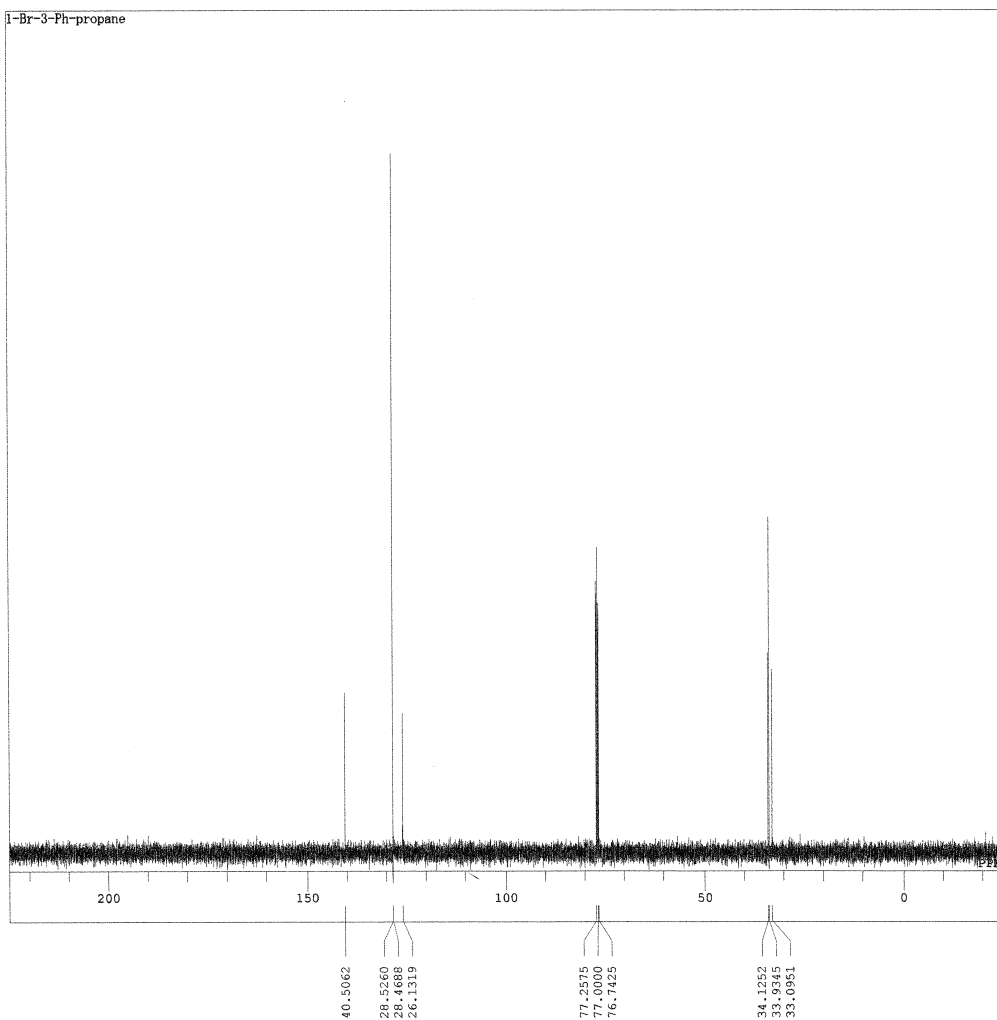

DFILE 1-Br-3-Ph-propane\_13C.jdf  
 COMNT 1-Br-3-Ph-propane  
 DATIM 2015-08-28 12:42:53  
 OBNUC 13C  
 EXMOD carbon.jxp  
 OBFREQ 125.77 MHz  
 OBSSET 7.87 KHz  
 OBFIN 4.21 Hz  
 POINT 32767  
 FREQU 39308.18 Hz  
 SCANS 20  
 ACQTM 0.8336 sec  
 PD 2.0000 sec  
 PW1 3.40 usec  
 IRNUC 1H  
 CTEMP 21.8 c  
 SLVNT CDCL3  
 EXREF 77.00 ppm  
 BP 0.12 Hz  
 RGAIN 60

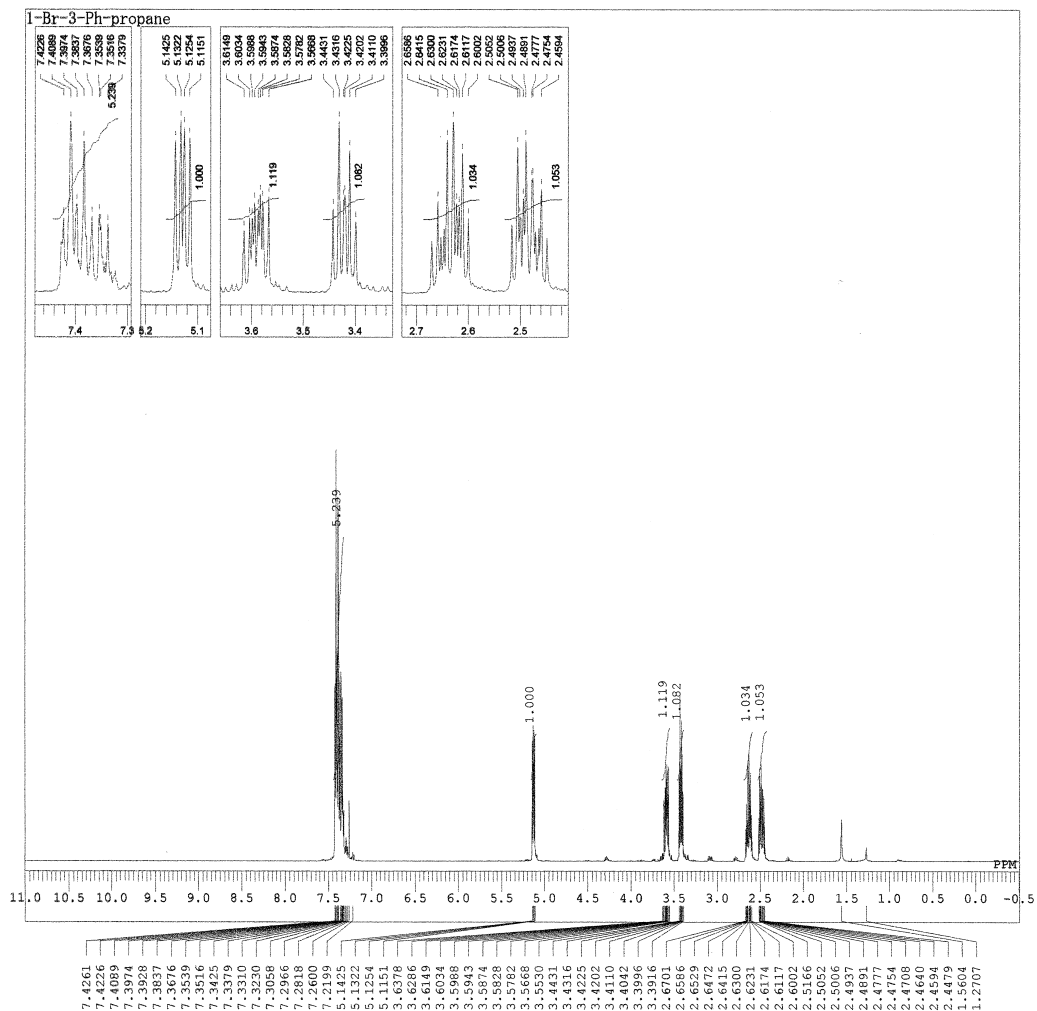

DFILE ozawa08-128\_1H.jdf  
 COMNT 1-Br-3-Ph-propane  
 DATIM 2015-09-24 10:04:19  
 OBNUC 1H  
 EXMOD proton.jxp  
 OBFRQ 500.16 MHz  
 OBSET 2.41 KHz  
 OBFIN 6.01 Hz  
 POINT 16384  
 FREQU 9384.38 Hz  
 SCANS 4  
 ACQTM 1.7459 sec  
 PD 5.0000 sec  
 PW1 5.55 usec  
 IRNUC 1H  
 CTEMP 23.2 c  
 SLVNT CDCL3  
 EXREF 7.26 ppm  
 BP 0.12 Hz  
 RGAIN 30

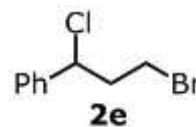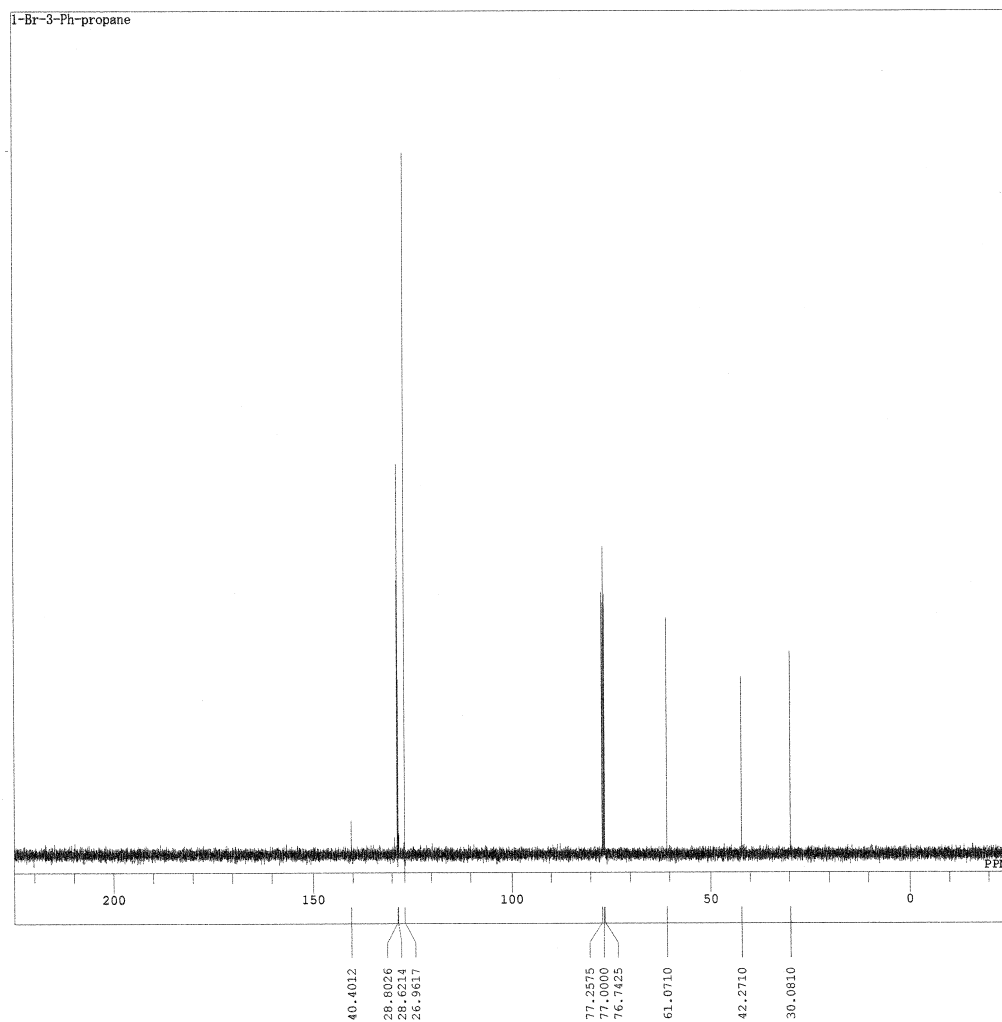

DFILE ozawa08-128\_13C.jdf  
 COMNT 1-Br-3-Ph-propane  
 DATIM 2015-09-24 10:05:23  
 OBNUC 13C  
 EXMOD carbon.jxp  
 OBFRQ 125.77 MHz  
 OBSET 7.87 KHz  
 OBFIN 4.21 Hz  
 POINT 32767  
 FREQU 99308.18 Hz  
 SCANS 60  
 ACQTM 0.8336 sec  
 PD 2.0000 sec  
 PW1 3.40 usec  
 IRNUC 1H  
 CTEMP 23.3 c  
 SLVNT CDCL3  
 EXREF 77.00 ppm  
 BP 0.12 Hz  
 RGAIN 60





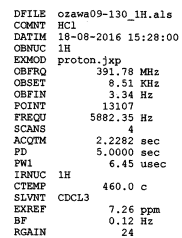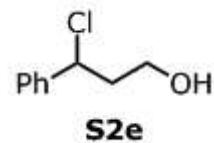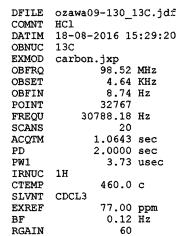

FBr3

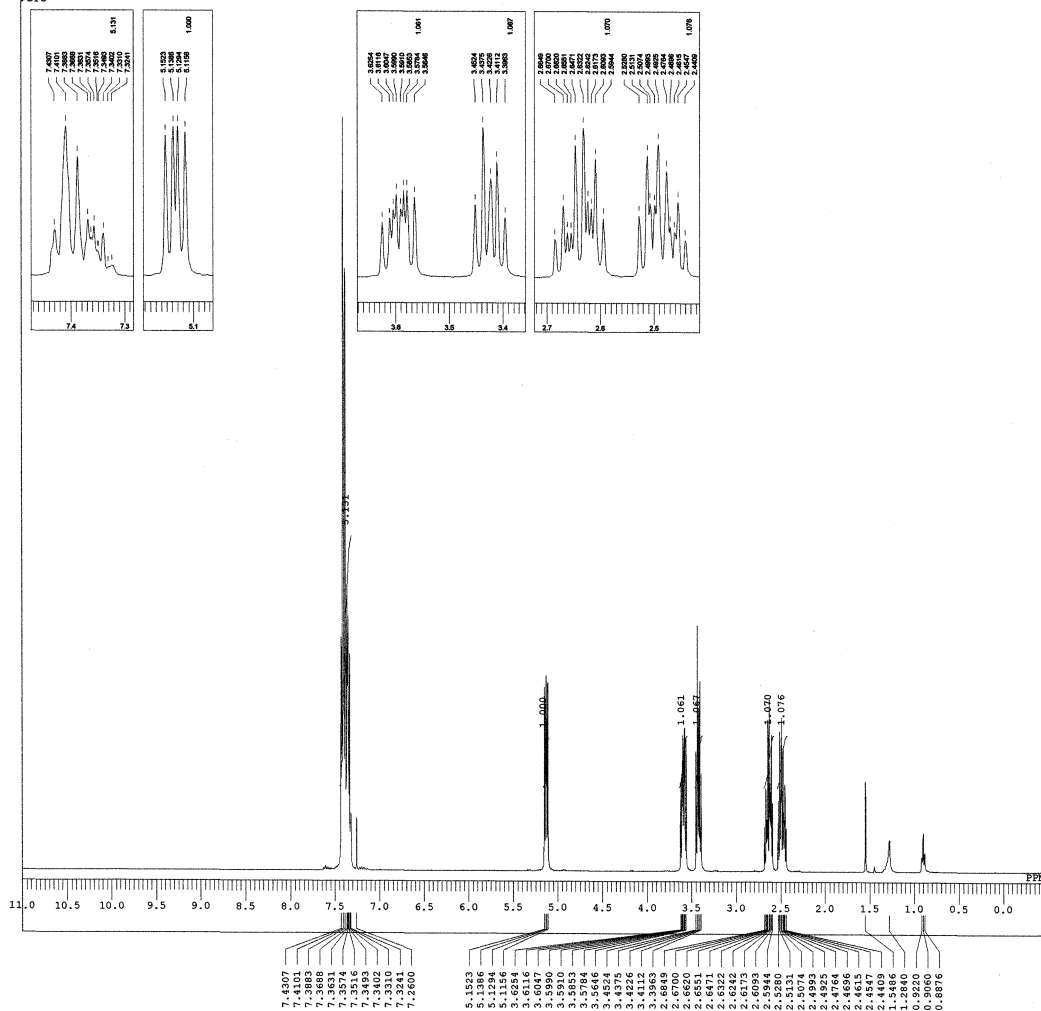

DFILE ozawa09-128\_1h.jdf  
 COMNT FBr3  
 DATIM 25-08-2016 16:05:32  
 CNUC 1H  
 EXMOD proton.jxp  
 OBFREQ 391.78 MHz  
 OBSET 8.51 KHz  
 OBFIN 3.34 Hz  
 POINT 16384  
 FREQU 7352.94 Hz  
 SCANS 4  
 ACQTM 2.2282 sec  
 PD 5.0000 sec  
 PW1 6.45 usec  
 IRNUC 1H  
 CTMP 460.0 c  
 SLVNT CDCL3  
 EXREF 7.26 ppm  
 BF 0.20 Hz  
 RGAIN 26

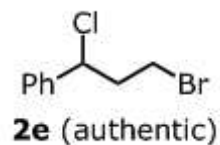

FBr-3

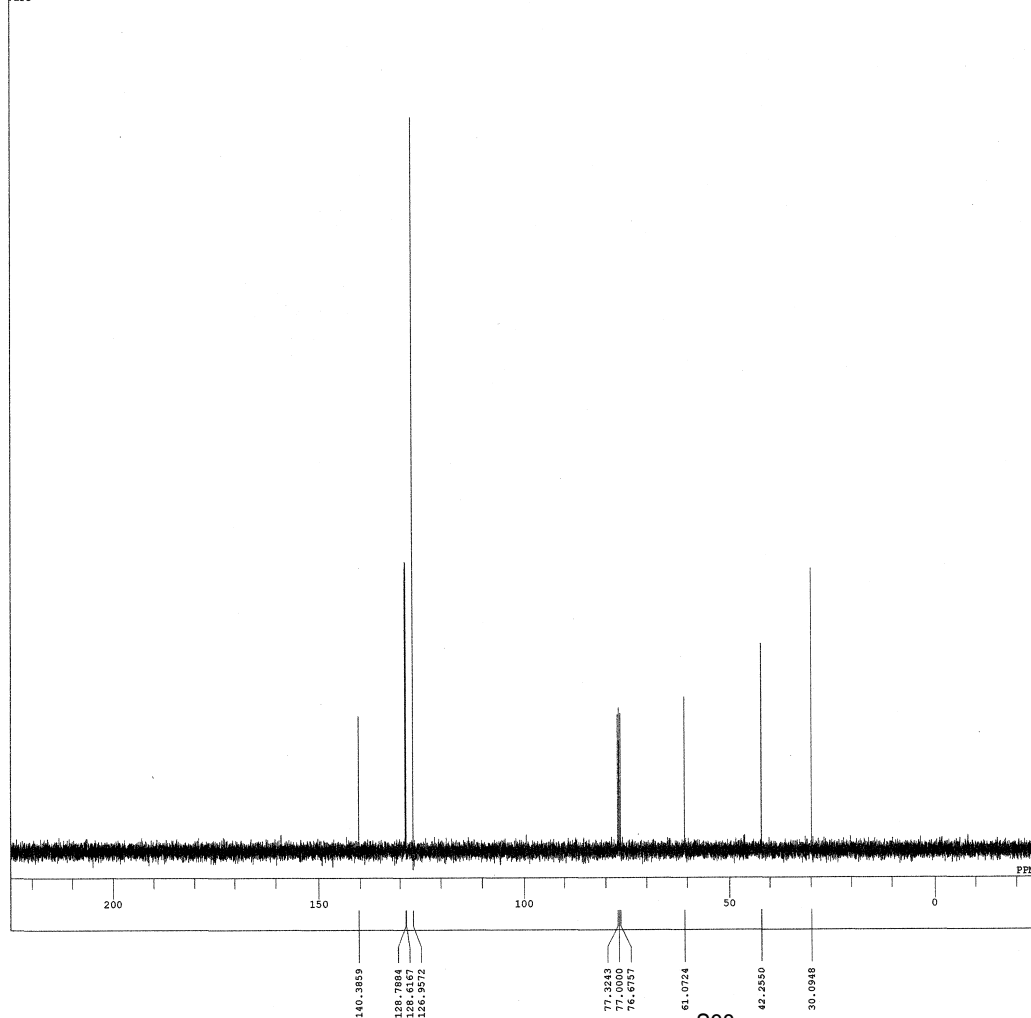

DFILE ozawa09-128\_13c.jdf  
 COMNT FBr3  
 DATIM 25-08-2016 16:07:52  
 CNUC 13C  
 EXMOD carbon.jxp  
 OBFREQ 98.52 MHz  
 OBSET 4.64 KHz  
 OBFIN 8.74 Hz  
 POINT 32767  
 FREQU 30788.18 Hz  
 SCANS 20  
 ACQTM 1.0643 sec  
 PD 2.0000 sec  
 PW1 3.73 usec  
 IRNUC 1H  
 CTMP 460.0 c  
 SLVNT CDCL3  
 EXREF 77.00 ppm  
 BF 0.20 Hz  
 RGAIN 60

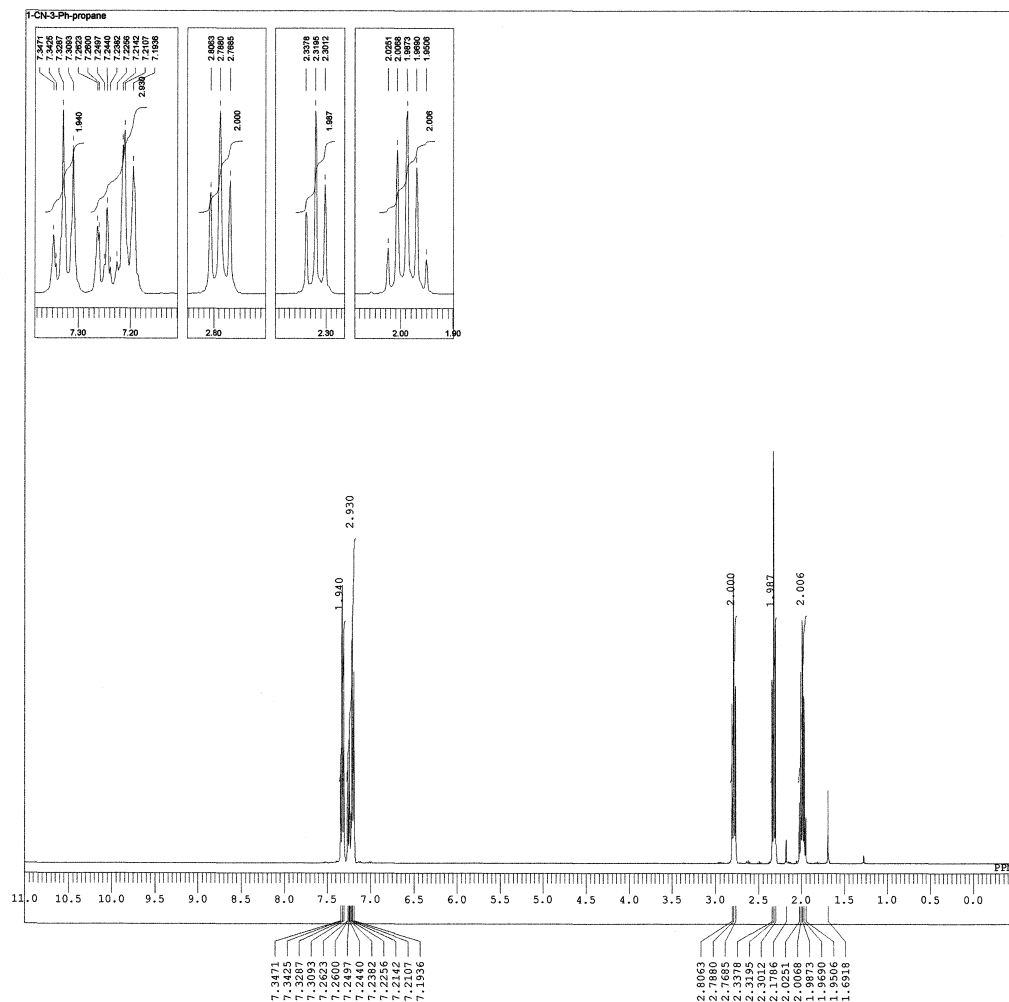

1-CN-3-Ph-propane

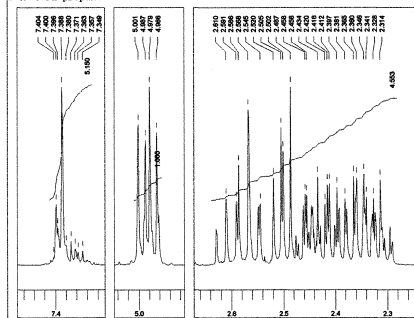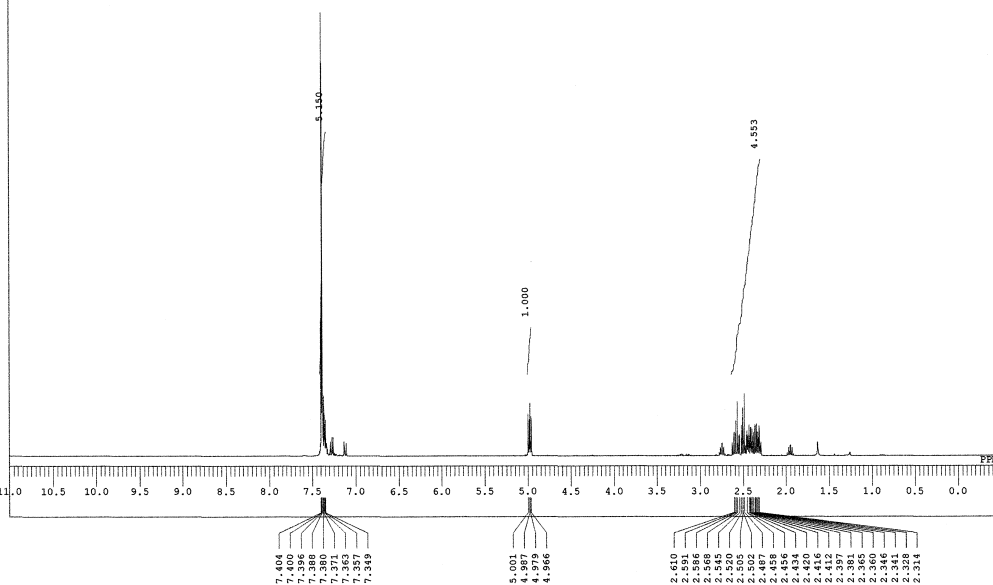

DFILE ozawa08-135\_1H.jdf  
 COMNT 1-CN-3-Ph-propane  
 DATIM 26-09-2015 14:59:48  
 OBNUC 1H  
 EXMOD proton.jxp  
 OBFREQ 391.78 MHz  
 OBSSET 8.51 KHz  
 OBTIN 3.34 Hz  
 POINT 16384  
 FREQU 7352.94 Hz  
 SCANS 4  
 ACQTM 2.2282 sec  
 PD 5.0000 sec  
 PW1 4.99 usec  
 IRNUC 1H  
 CTMP CDCL3  
 SLVNT CDCL3  
 EXREF 7.26 ppm  
 BF 0.12 Hz  
 RGAIN 28

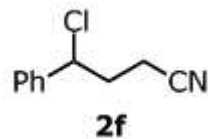

1-CN-3-Ph-propane

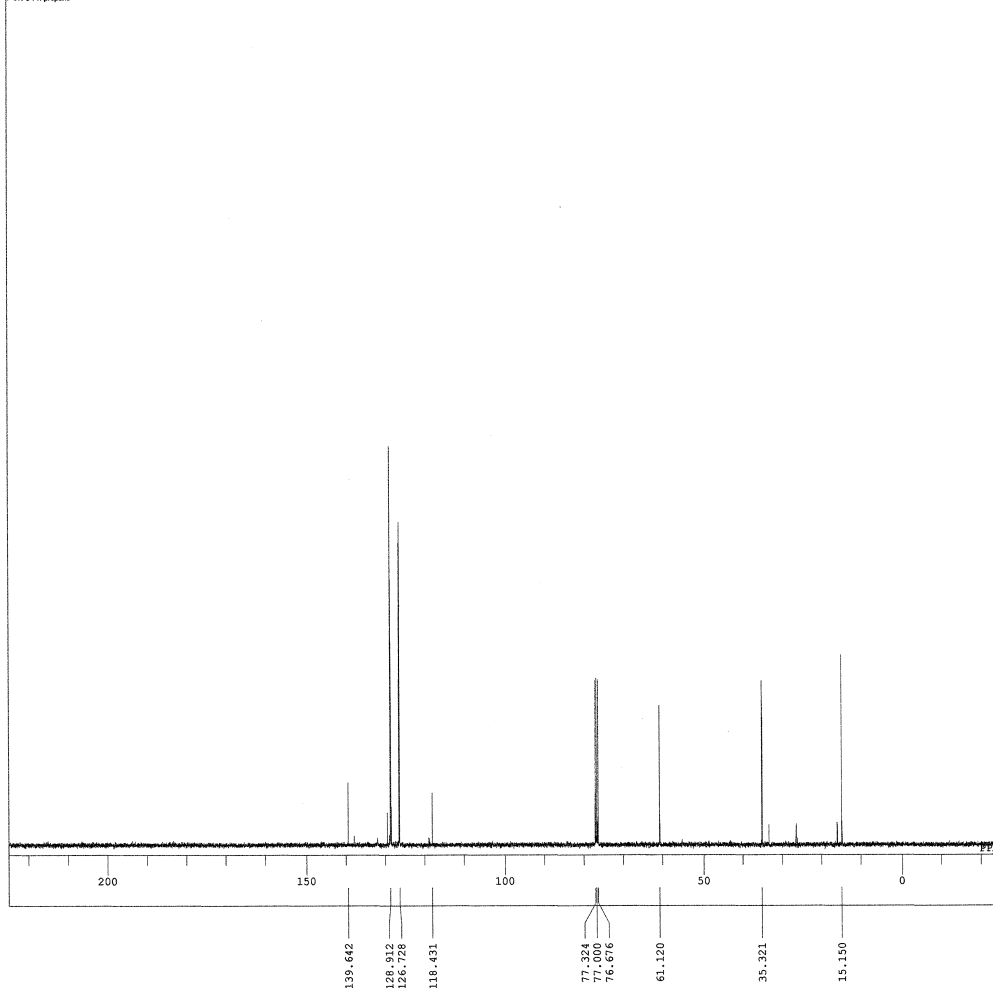

DFILE ozawa08-135\_13C.jdf  
 COMNT 1-CN-3-Ph-propane  
 DATIM 26-09-2015 15:00:50  
 OBNUC 13C  
 EXMOD carbon.jxp  
 OBFREQ 98.52 MHz  
 OBSSET 4.64 KHz  
 OBTIN 8.74 Hz  
 POINT 32767  
 FREQU 30788.18 Hz  
 SCANS 100  
 ACQTM 1.0643 sec  
 PD 2.0000 sec  
 PW1 3.16 usec  
 IRNUC 1H  
 CTMP CDCL3  
 SLVNT CDCL3  
 EXREF 77.00 ppm  
 BF 1.20 Hz  
 RGAIN 60

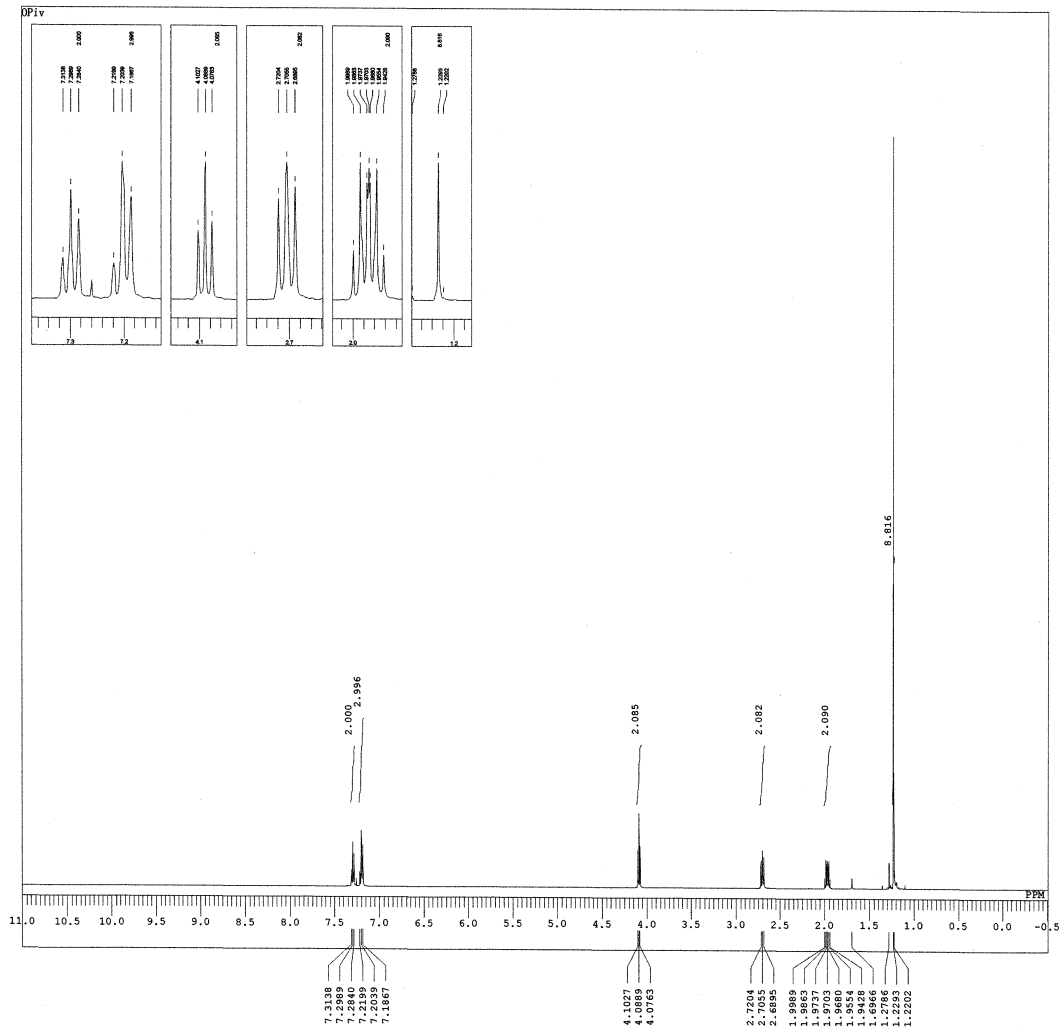

DFILE ozawa09-197\_1H.als  
 COMNT OPiv  
 DATIM 2016-09-27 10:16:50  
 CNUC 1H  
 EXMOD proton.jxp  
 OBFRQ 500.16 MHz  
 OBSET 2.41 KHz  
 OBFIN 6.01 Hz  
 POINT 13107  
 FREQU 7507.51 Hz  
 SCANS 4  
 ACQTM 1.7459 sec  
 PD 5.0000 sec  
 PW1 5.55 usec  
 TRNUC 1H  
 CTEMP 20.9 c  
 SLVNT CDCL3  
 EXREF 7.26 ppm  
 BF 0.12 Hz  
 RGAIN 24

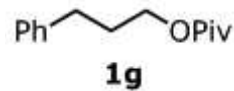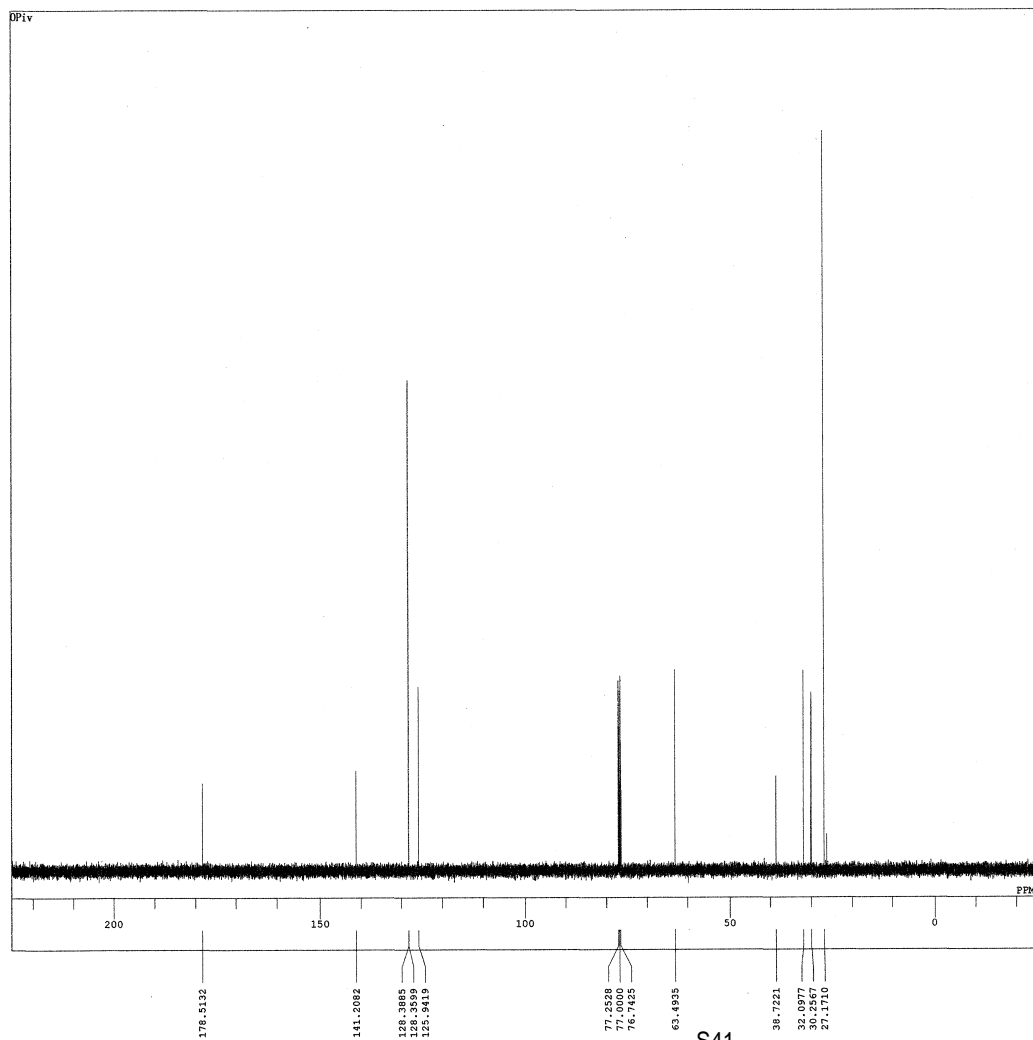

DFILE ozawa09-197\_13C.als  
 COMNT OPiv  
 DATIM 2016-09-27 10:17:50  
 CNUC 13C  
 EXMOD carbon.jxp  
 OBFRQ 125.77 MHz  
 OBSET 7.87 KHz  
 OBFIN 4.21 Hz  
 POINT 52428  
 FREQU 31446.54 Hz  
 SCANS 16  
 ACQTM 1.6672 sec  
 PD 2.0000 sec  
 PW1 3.40 usec  
 TRNUC 13C  
 CTEMP 21.1 c  
 SLVNT CDCL3  
 EXREF 77.00 ppm  
 BF 0.12 Hz  
 RGAIN 60



Et-C4H4-NO2

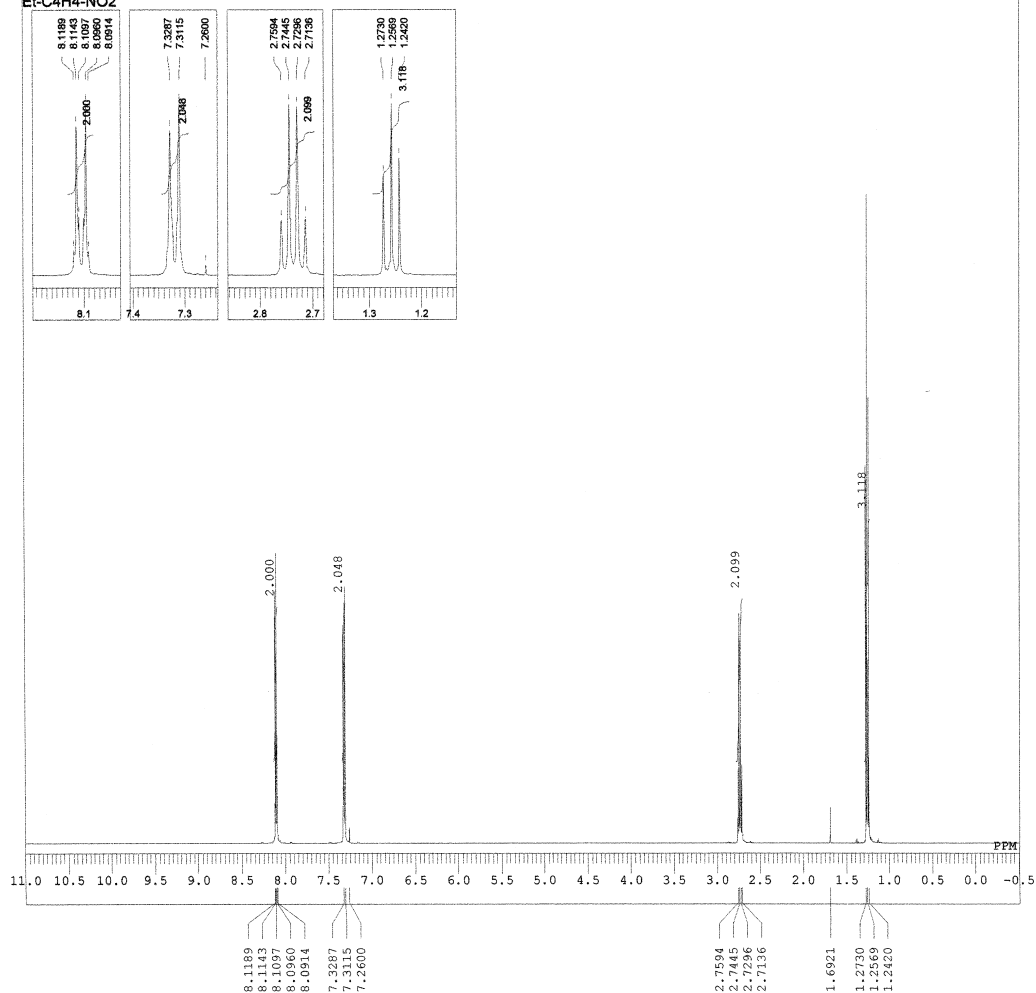

DFILE Et-C4H4-NO2\_1h.jdf  
 COMNT Et-C4H4-NO2  
 DATIM 2015-08-26 10:20:26  
 OBNUC 1H  
 EXMOD proton.jxp  
 OBFRQ 500.16 MHz  
 OBSET 2.41 KHz  
 OBFIN 6.01 Hz  
 POINT 16384  
 FREQU 9384.38 Hz  
 SCANS 4  
 ACQTM 1.7459 sec  
 PD 5.0000 sec  
 PW1 5.55 usec  
 IRNUC 1H  
 CTEMP 21.5 c  
 SLVNT CDCL3  
 EXREF 7.26 ppm  
 BF 0.12 Hz  
 RGAIN 28

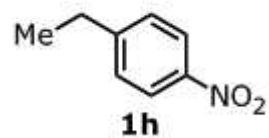

Et-C4H4-NO2

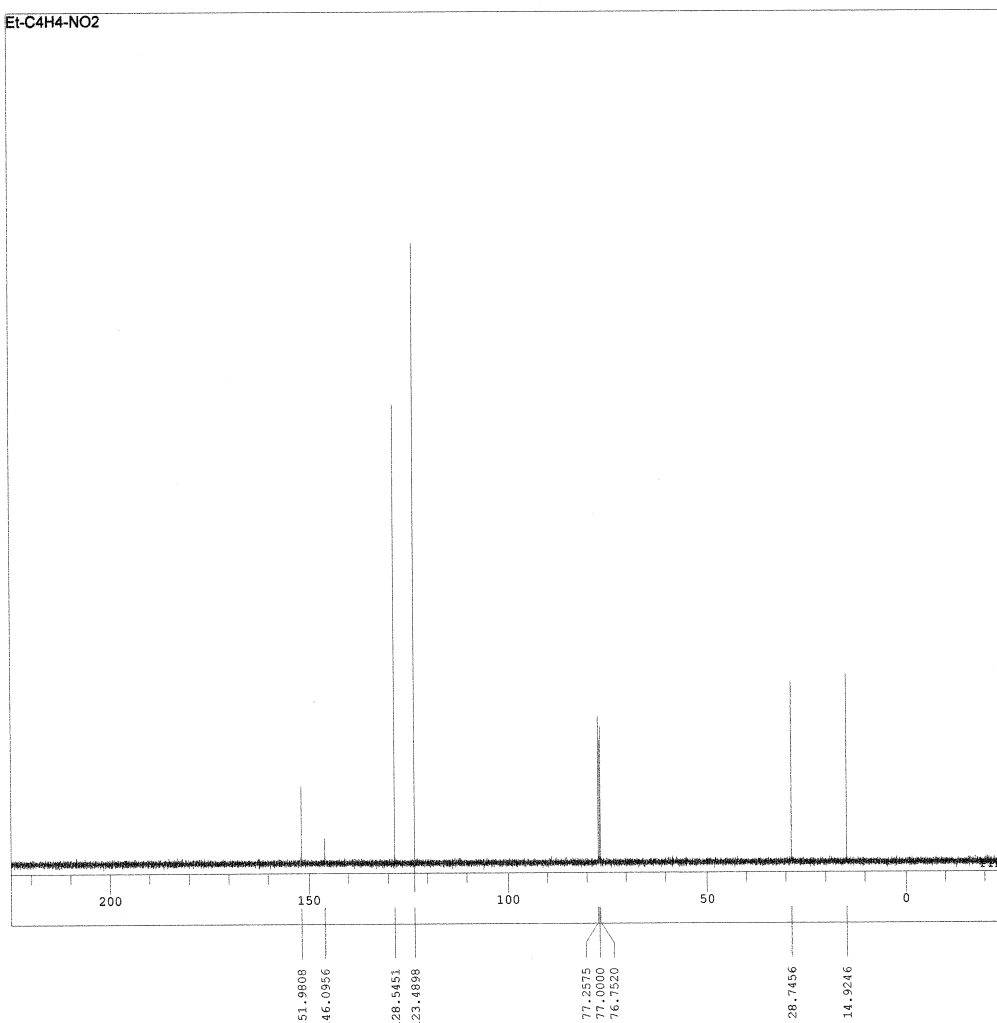

DFILE Et-C4H4-NO2\_13C.jdf  
 COMNT Et-C4H4-NO2  
 DATIM 2015-08-26 10:22:07  
 OBNUC 13C  
 EXMOD carbon.jxp  
 OBFRQ 125.77 MHz  
 OBSET 7.87 KHz  
 OBFIN 4.21 Hz  
 POINT 32767  
 FREQU 39308.18 Hz  
 SCANS 12  
 ACQTM 0.8336 sec  
 PD 10.0000 sec  
 PW1 3.40 usec  
 IRNUC 1H  
 CTEMP 21.7 c  
 SLVNT CDCL3  
 EXREF 77.00 ppm  
 BF 0.12 Hz  
 RGAIN 60

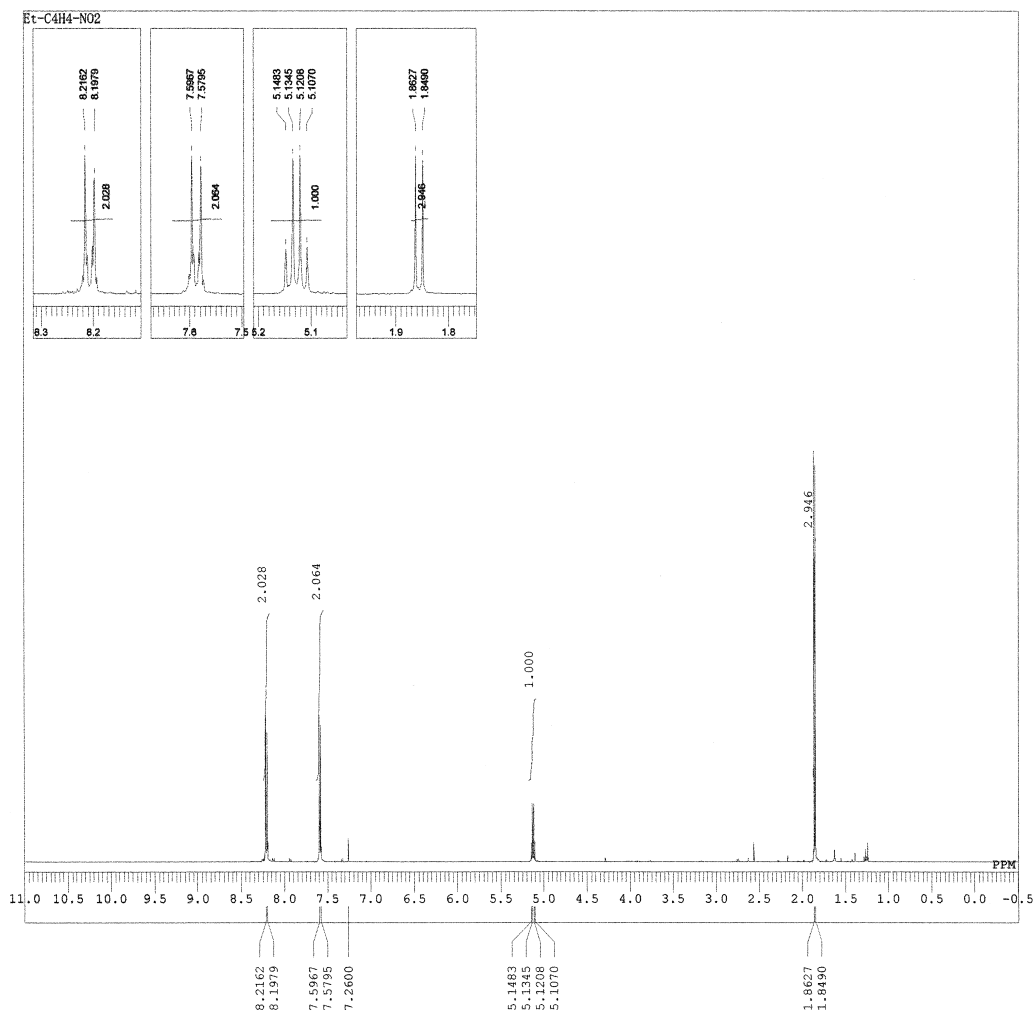

DFILE ozawa08-086\_1h.jdf  
 COMNT Et-C4H4-NO2  
 DATIM 2015-08-28 12:26:07  
 OBNUC 1H  
 EXMOD proton.jxp  
 OBFRQ 500.16 MHz  
 OBSET 2.41 KHz  
 OBFIN 6.01 Hz  
 POINT 16384  
 FREQU 9384.38 Hz  
 SCANS 4  
 ACQTM 1.7459 sec  
 PD 5.0000 sec  
 PW1 5.55 usec  
 IRNUC 1H  
 CTEMP 21.5 c  
 SLVNT CDCL3  
 EXREF 7.26 ppm  
 BP 0.12 Hz  
 RGAIN 30

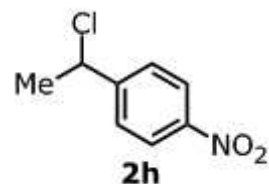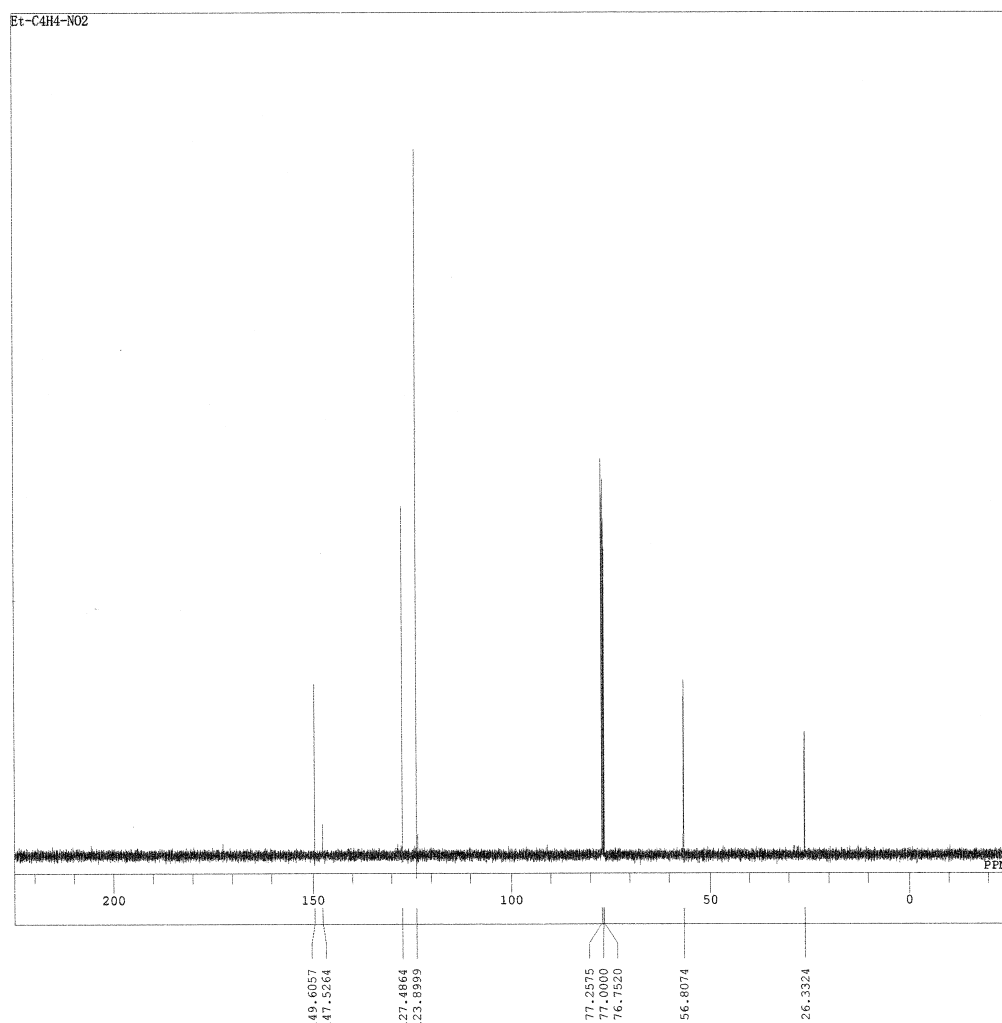

DFILE ozawa08-086\_13c.jdf  
 COMNT Et-C4H4-NO2  
 DATIM 2015-08-28 12:28:57  
 OBNUC 13C  
 EXMOD carbon.jxp  
 OBFRQ 125.77 MHz  
 OBSET 7.87 KHz  
 OBFIN 4.21 Hz  
 POINT 32767  
 FREQU 39308.18 Hz  
 SCANS 32  
 ACQTM 0.8336 sec  
 PD 10.0000 sec  
 PW1 3.40 usec  
 IRNUC 1H  
 CTEMP 21.8 c  
 SLVNT CDCL3  
 EXREF 77.00 ppm  
 BP 0.12 Hz  
 RGAIN 60



Et-C4H4-CN

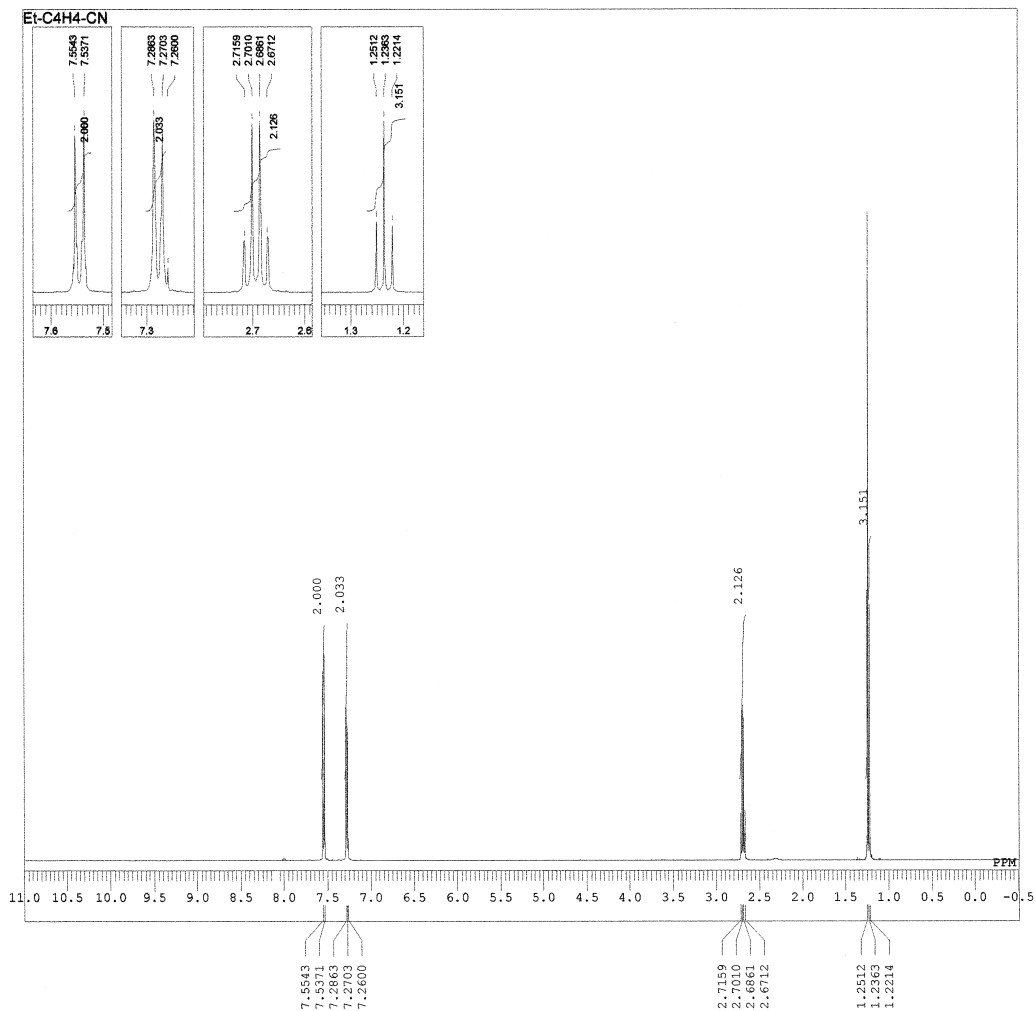

DFILE Et-C4H4-CN\_1H.jdf  
 COMNT Et-C4H4-CN  
 DATIM 2015-08-26 10:16:11  
 OBNUC 1H  
 EXMOD proton.jxp  
 OBFRQ 500.16 MHz  
 OBSET 2.41 KHz  
 OBFIN 6.01 Hz  
 POINT 16384  
 FREQU 9384.38 Hz  
 SCANS 4  
 ACQTM 1.7459 sec  
 PD 5.0000 sec  
 PW1 5.55 usec  
 IRNUC 1H  
 CTEMP 21.5 c  
 SLVNT CDCL3  
 EXREF 7.26 ppm  
 BF 0.12 Hz  
 RGAIN 30

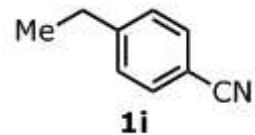

Et-C4H4-CN

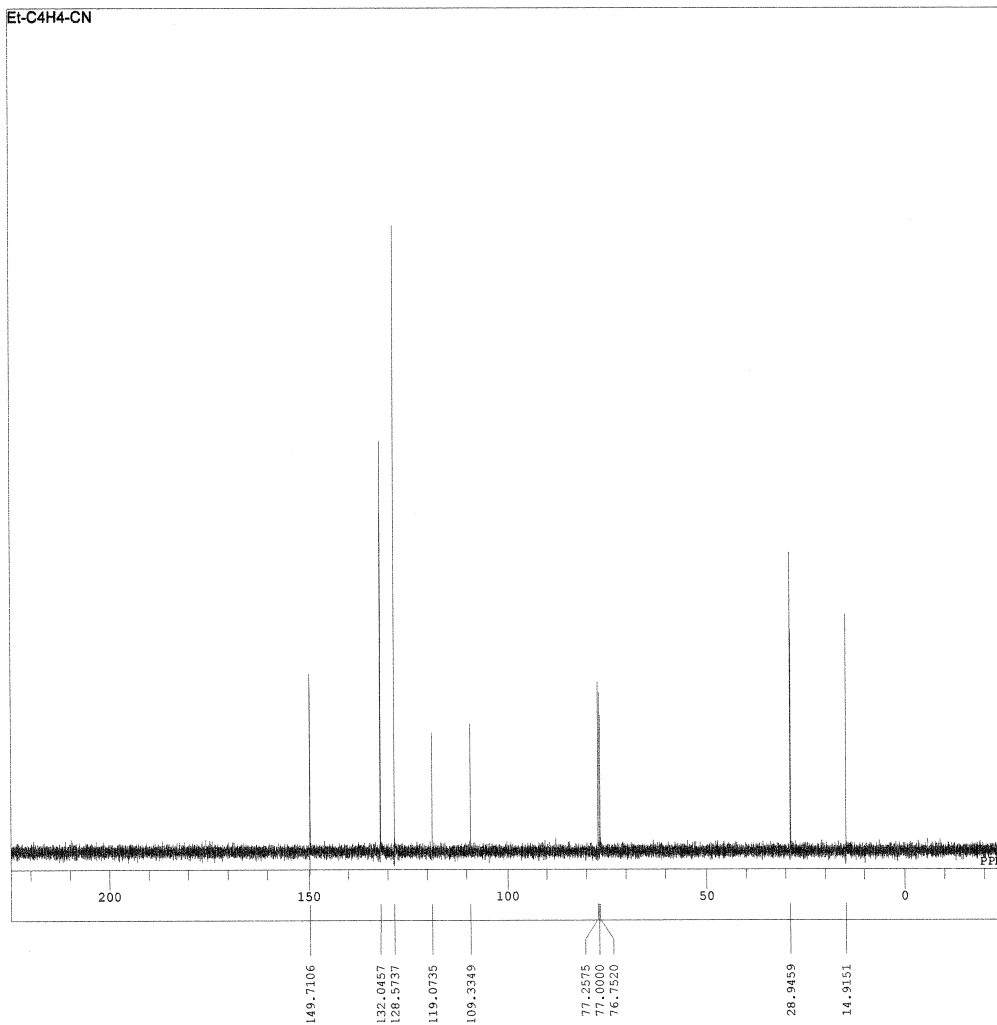

DFILE Et-C4H4-CN\_13C.jdf  
 COMNT Et-C4H4-CN  
 DATIM 2015-08-26 10:17:13  
 OBNUC 13C  
 EXMOD carbon.jxp  
 OBFRQ 125.77 MHz  
 OBSET 7.87 KHz  
 OBFIN 4.21 Hz  
 POINT 32767  
 FREQU 39308.18 Hz  
 SCANS 12  
 ACQTM 0.8336 sec  
 PD 2.0000 sec  
 PW1 3.40 usec  
 IRNUC 1H  
 CTEMP 21.6 c  
 SLVNT CDCL3  
 EXREF 77.00 ppm  
 BF 0.12 Hz  
 RGAIN 60

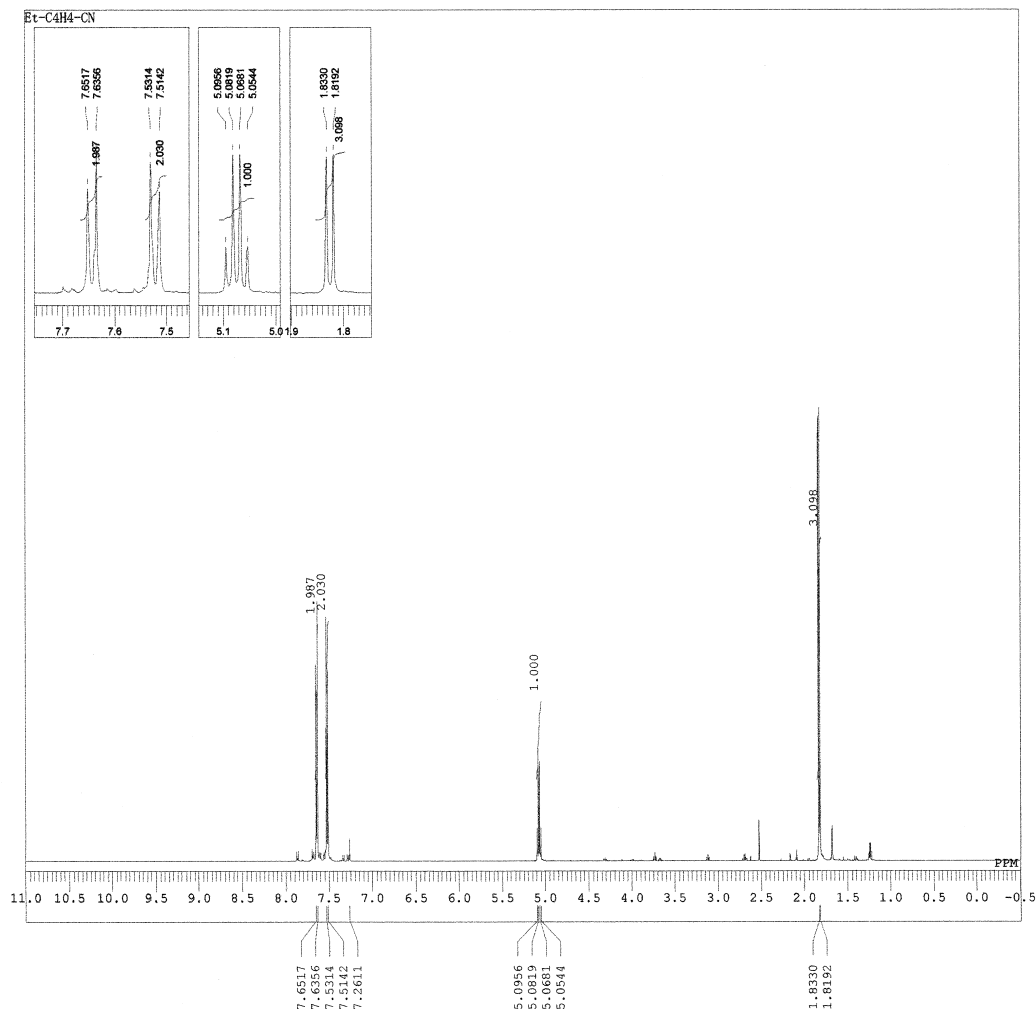

DFILE ozawa08-087\_1h.jdf  
 CONNT Et-C4H4-CN  
 DATIM 2015-08-28 12:37:27  
 OBNUC 1H  
 EXMOD proton.jxp  
 OBFRQ 500.16 MHz  
 OBSET 2.41 KHz  
 OBFIN 6.01 Hz  
 POINT 16384  
 FREQU 9384.38 Hz  
 SCANS 4  
 ACQTM 1.7459 sec  
 PD 5.0000 sec  
 PW1 5.55 usec  
 IRNUC 1H  
 CTEMP 21.6 c  
 SLVNT CDCL3  
 EXREF 7.26 ppm  
 BF 0.12 Hz  
 RGAIN 30

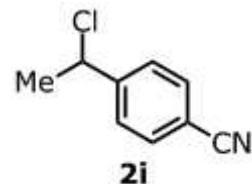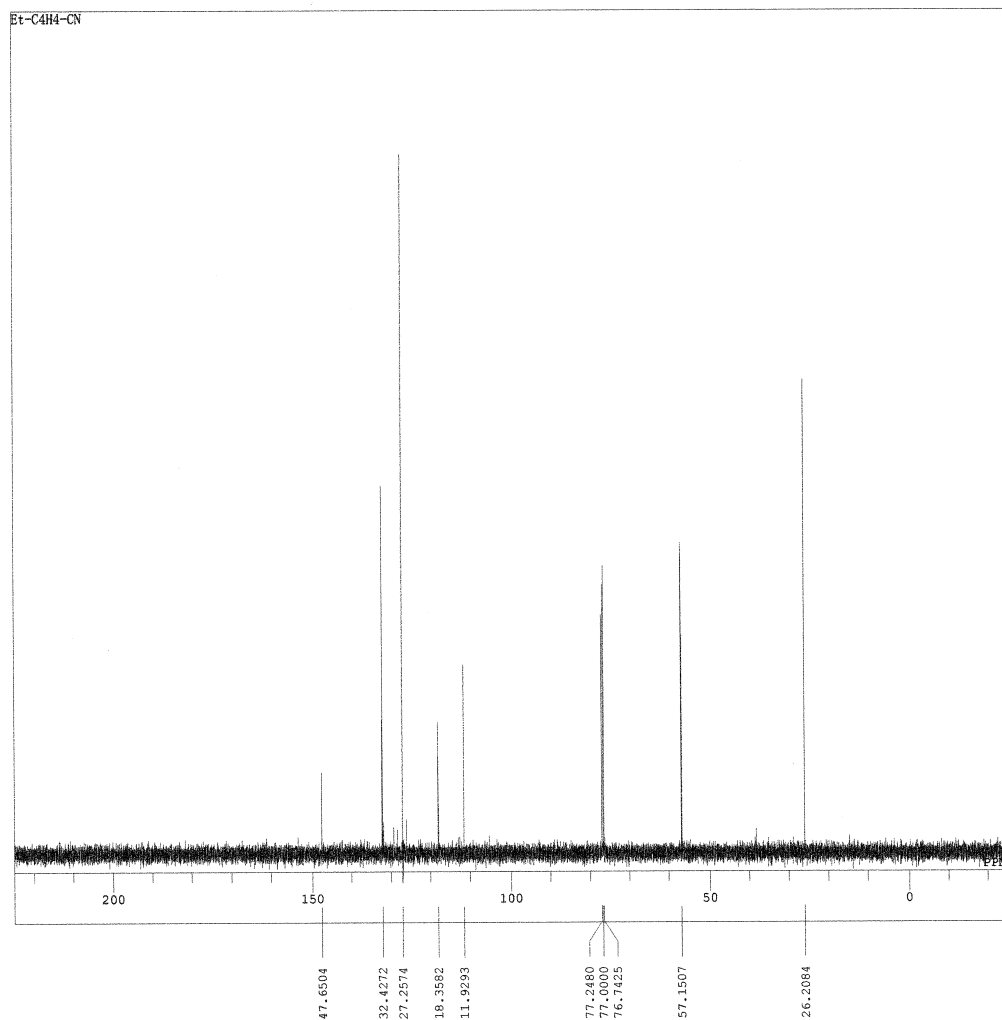

DFILE ozawa08-087\_13c.jdf  
 CONNT Et-C4H4-CN  
 DATIM 2015-08-28 12:38:29  
 OBNUC 13C  
 EXMOD carbon.jxp  
 OBFRQ 125.77 MHz  
 OBSET 7.87 KHz  
 OBFIN 4.21 Hz  
 POINT 32767  
 FREQU 39308.18 Hz  
 SCANS 20  
 ACQTM 0.8336 sec  
 PD 2.0000 sec  
 PW1 3.40 usec  
 IRNUC 1H  
 CTEMP 21.7 c  
 SLVNT CDCL3  
 EXREF 77.00 ppm  
 BF 0.12 Hz  
 RGAIN 60

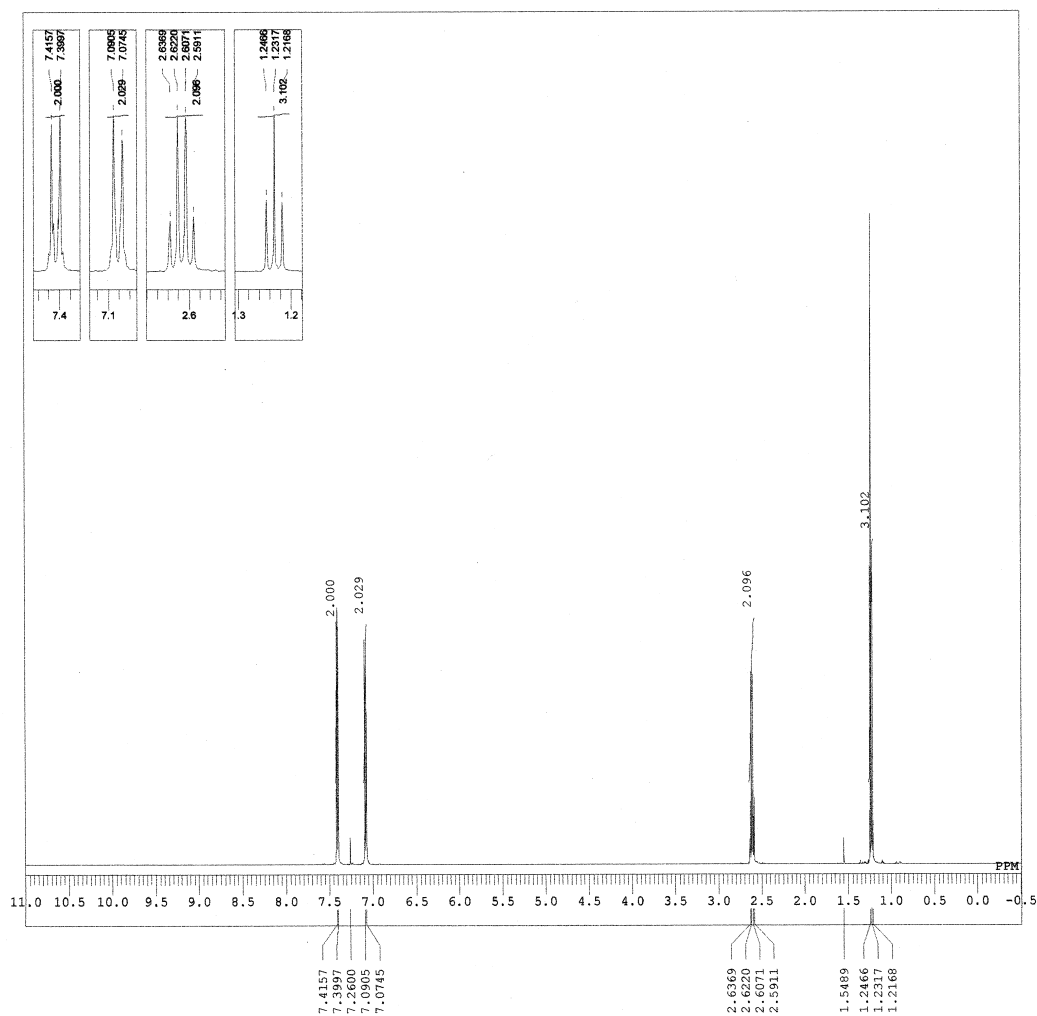

DFILE \_Et-C4H4-Br\_1H.jdf  
 COMNT  
 DATIM 2016-01-12 10:40:32  
 OBNUC 1H  
 EXMOD proton.jxp  
 OBFREQ 500.16 MHz  
 OBSET 2.41 KHz  
 OBFIN 6.01 Hz  
 POINT 16384  
 FREQU 9384.38 Hz  
 SCANS 4  
 ACQTM 1.7459 sec  
 PD 5.0000 sec  
 FW1 5.55 usec  
 IRNUC 1H  
 CTEMP 32.4 c  
 SLVNT CDCL3  
 EXREF 7.26 ppm  
 BF 0.12 Hz  
 RGAIN 28

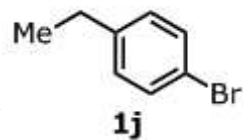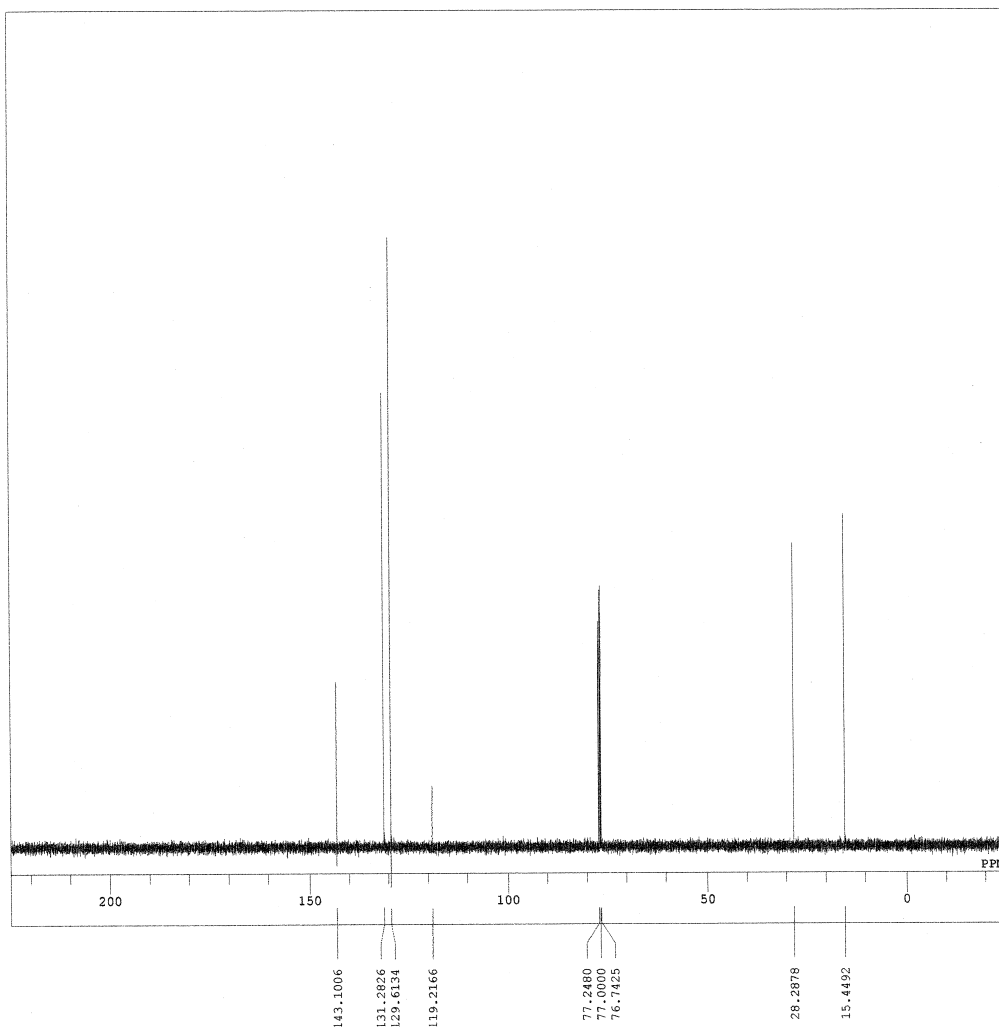

DFILE \_Et-C4H4-Br\_13C.jdf  
 COMNT  
 DATIM 2016-01-12 10:41:34  
 OBNUC 13C  
 EXMOD carbon.jxp  
 OBFREQ 125.77 MHz  
 OBSET 7.87 KHz  
 OBFIN 4.21 Hz  
 POINT 32767  
 FREQU 39308.18 Hz  
 SCANS 44  
 ACQTM 0.8336 sec  
 PD 2.0000 sec  
 FW1 3.40 usec  
 IRNUC 1H  
 CTEMP 33.1 c  
 SLVNT CDCL3  
 EXREF 77.00 ppm  
 BF 0.12 Hz  
 RGAIN 60

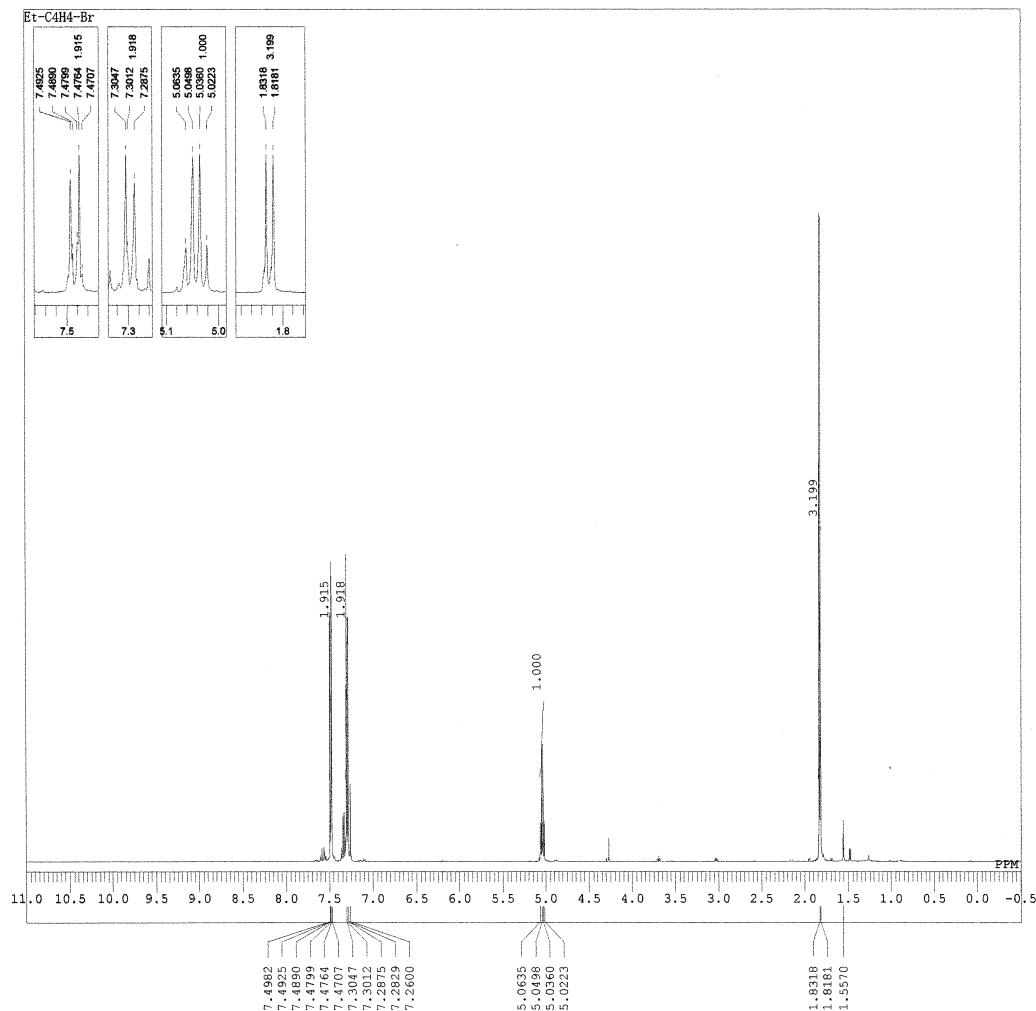

DFILE ozawa08-154\_1h.jdf  
 COMNT Et-C4H4-Br  
 DATIM 2015-12-28 14:09:47  
 OBNUC 1H  
 EXMOD proton.jxp  
 OBFRQ 500.16 MHz  
 OBSET 2.41 KHz  
 OBFIN 6.01 Hz  
 POINT 16384  
 FREQU 9384.38 Hz  
 SCANS 4  
 ACQTM 1.7459 sec  
 PD 5.0000 sec  
 PW1 5.55 usec  
 TRNUC 1H  
 CTEMP 33.2 c  
 SLVNT CDCL3  
 EXREF 7.26 ppm  
 BF 0.12 Hz  
 RGAIN 30

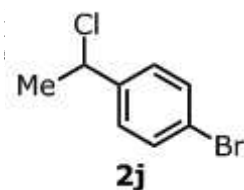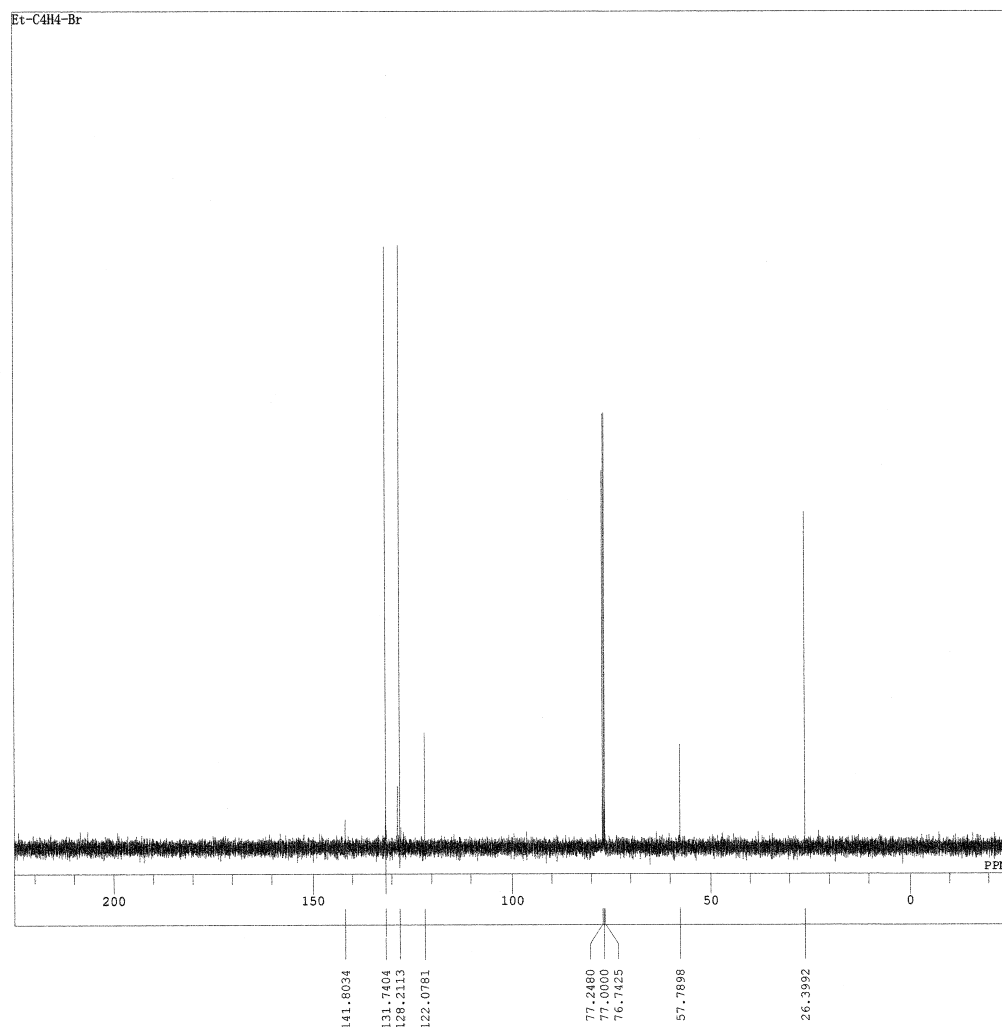

DFILE ozawa08-154\_13c.jdf  
 COMNT Et-C4H4-Br  
 DATIM 2015-12-28 14:11:14  
 OBNUC 13C  
 EXMOD carbon.jxp  
 OBFRQ 125.77 MHz  
 OBSET 7.87 KHz  
 OBFIN 4.21 Hz  
 POINT 32767  
 FREQU 39308.18 Hz  
 SCANS 60  
 ACQTM 0.8336 sec  
 PD 2.0000 sec  
 PW1 3.40 usec  
 TRNUC 13C  
 CTEMP 30.2 c  
 SLVNT CDCL3  
 EXREF 77.00 ppm  
 BF 0.12 Hz  
 RGAIN 60

NaBH4

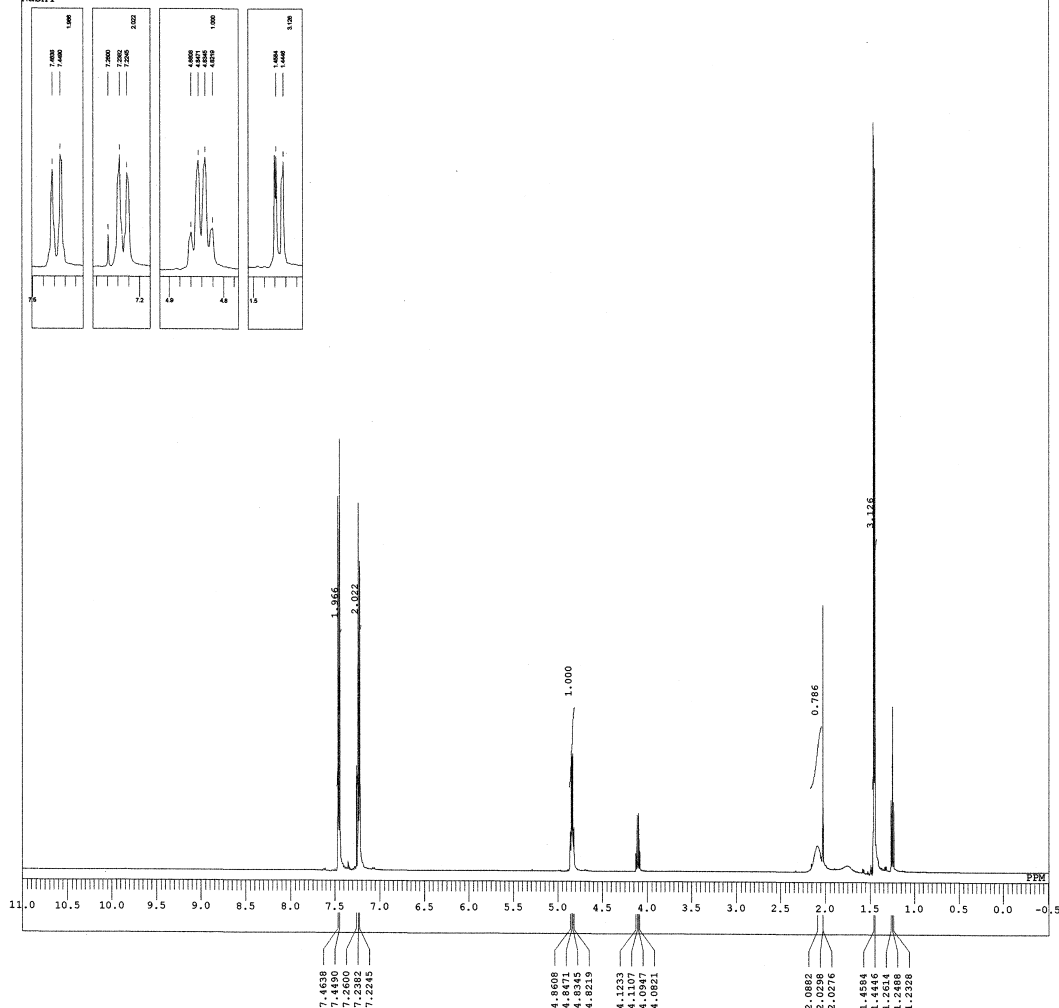

DFILE ozawa09-124\_1H.als  
 COMNT NaBH4  
 DATIM 2016-08-10 15:18:53  
 OBNUC 1H  
 EXMOD proton.jpg  
 OBFRQ 500.16 MHz  
 OBSET 2.41 KHz  
 OBTIN 6.01 Hz  
 POINT 13107  
 FREQU 7507.51 Hz  
 SCANS 4  
 ACQTM 1.7459 sec  
 PD 5.0000 sec  
 FWI 5.55 usec  
 IRNUC 1H  
 CTMP 21.4 c  
 SLVNT CDCL3  
 EXREF 7.26 ppm  
 BF 0.12 Hz  
 RGAIN 30

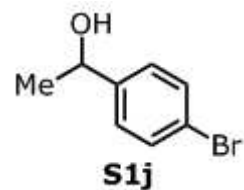

NaBH4

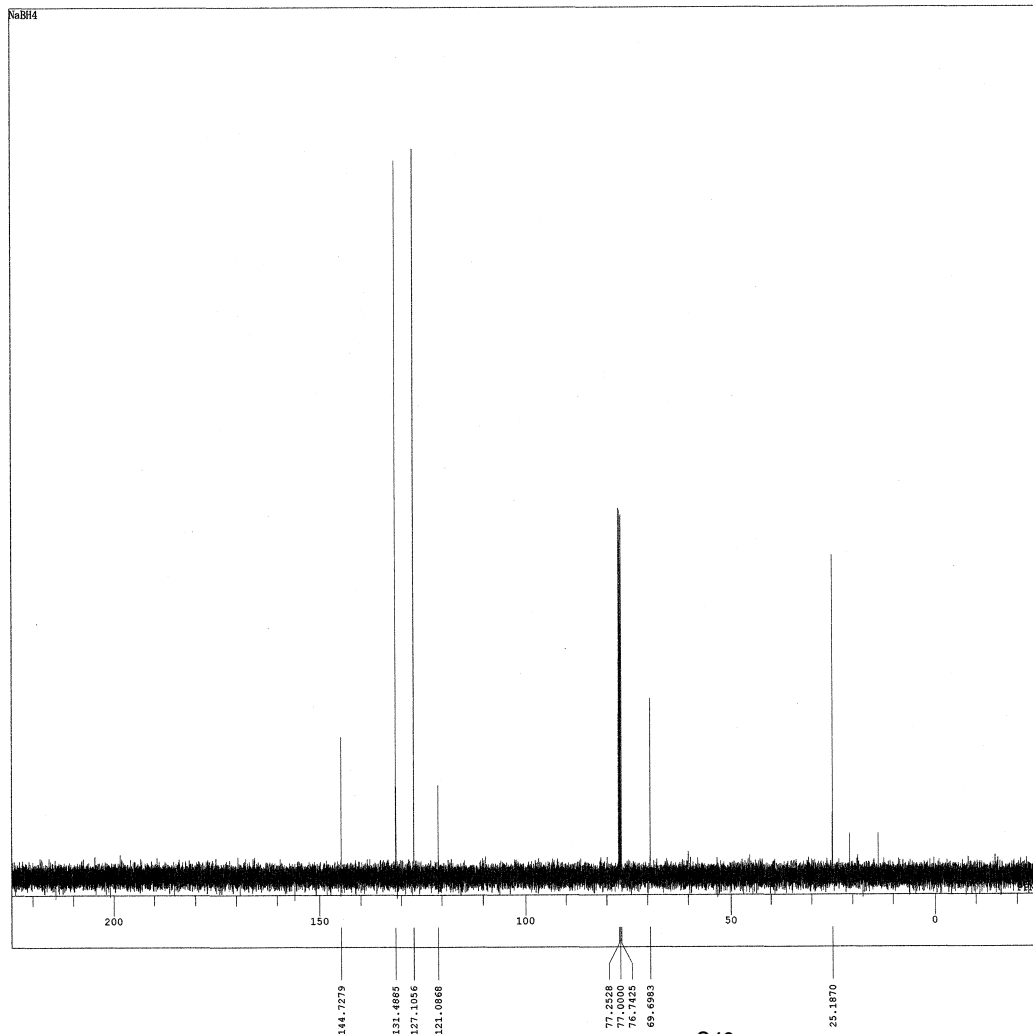

DFILE ozawa09-124\_13C.als  
 COMNT NaBH4  
 DATIM 2016-08-10 15:19:53  
 OBNUC 13C  
 EXMOD carbon.jpg  
 OBFRQ 125.77 MHz  
 OBSET 7.87 KHz  
 OBTIN 4.21 Hz  
 POINT 52428  
 FREQU 31446.54 Hz  
 SCANS 20  
 ACQTM 1.6672 sec  
 PD 2.0000 sec  
 FWI 3.40 usec  
 IRNUC 1H  
 CTMP 21.6 c  
 SLVNT CDCL3  
 EXREF 77.00 ppm  
 BF 0.12 Hz  
 RGAIN 60

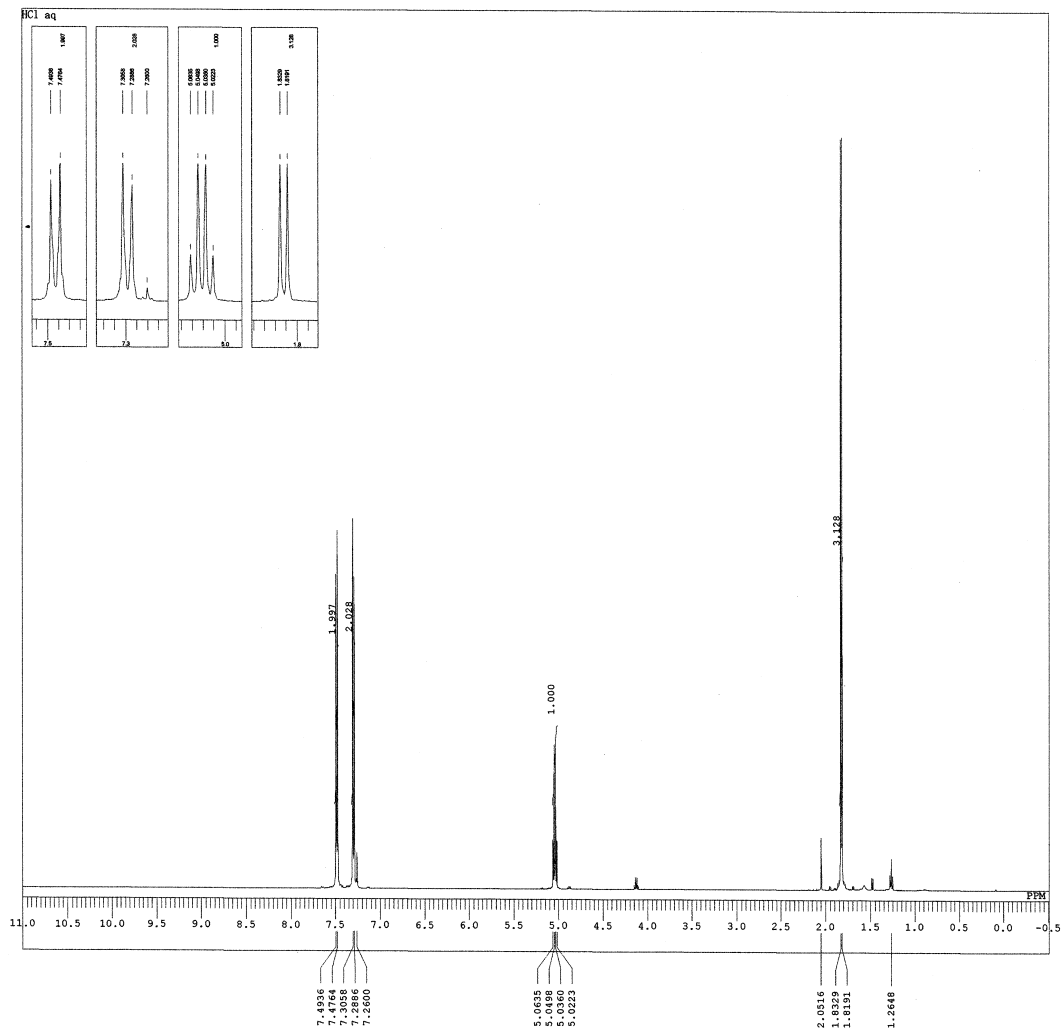

DFILE ozawa09-125\_1H.als  
 COMNT HCl aq  
 DATIM 2016-08-12 14:51:49  
 CNUC 1H  
 EXMOD proton.jpg  
 OBFRQ 500.16 MHz  
 OBSET 2.41 KHz  
 OBFIN 6.01 Hz  
 POINT 13107  
 FREQU 7507.51 Hz  
 SCANS 4  
 ACQTM 1.7459 sec  
 PD 5.0000 sec  
 PWI 5.55 usec  
 IRNUC 1H  
 CTEMP 21.3 c  
 SLVNT CDCL3  
 EXREF 7.26 ppm  
 BF 0.12 Hz  
 RGAIN 30

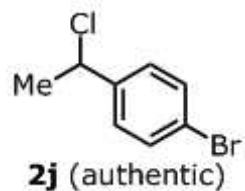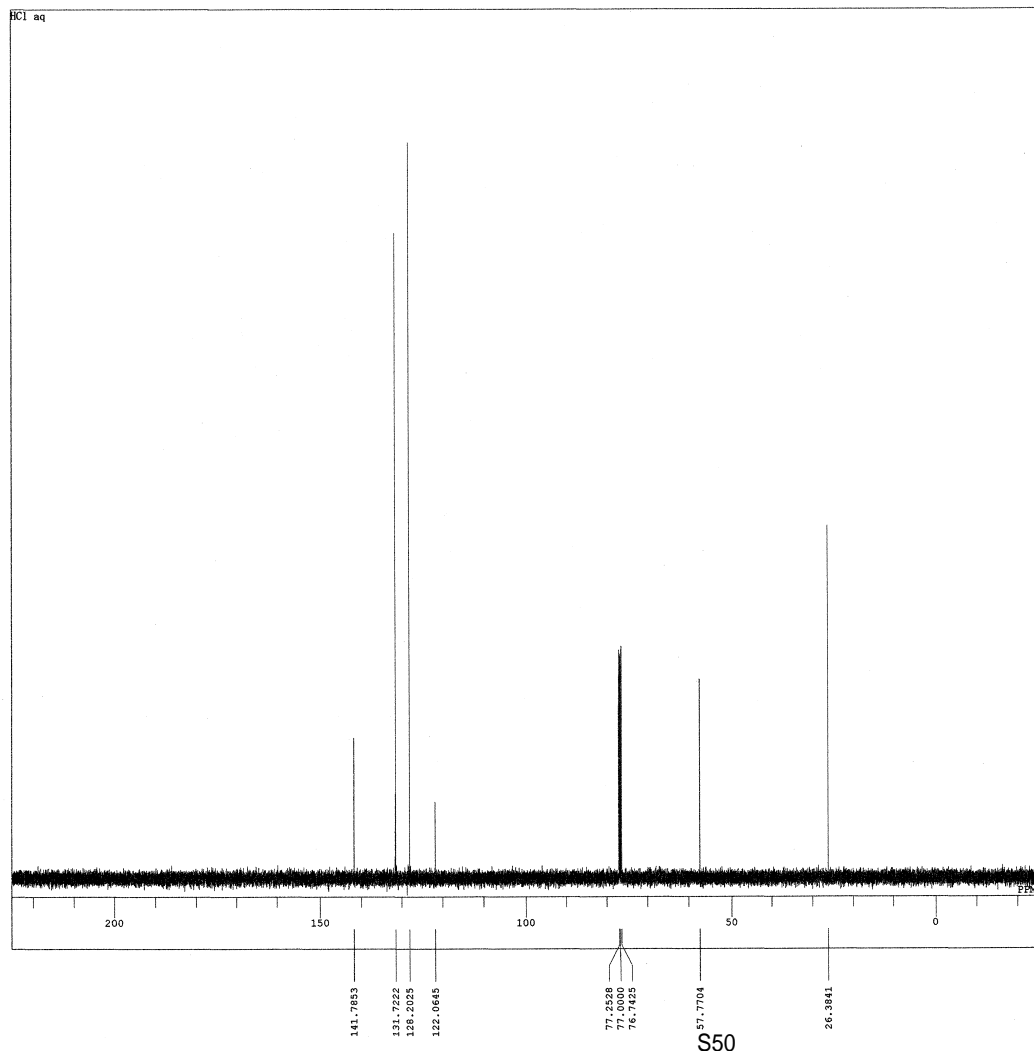

DFILE ozawa09-125\_13C.als  
 COMNT HCl aq  
 DATIM 2016-08-12 14:52:49  
 CNUC 13C  
 EXMOD carbon.jpg  
 OBFRQ 125.77 MHz  
 OBSET 7.87 KHz  
 OBFIN 4.21 Hz  
 POINT 52428  
 FREQU 31446.54 Hz  
 SCANS 20  
 ACQTM 1.6672 sec  
 PD 2.0000 sec  
 PWI 3.40 usec  
 IRNUC 1H  
 CTEMP 21.5 c  
 SLVNT CDCL3  
 EXREF 77.00 ppm  
 BF 0.12 Hz  
 RGAIN 60

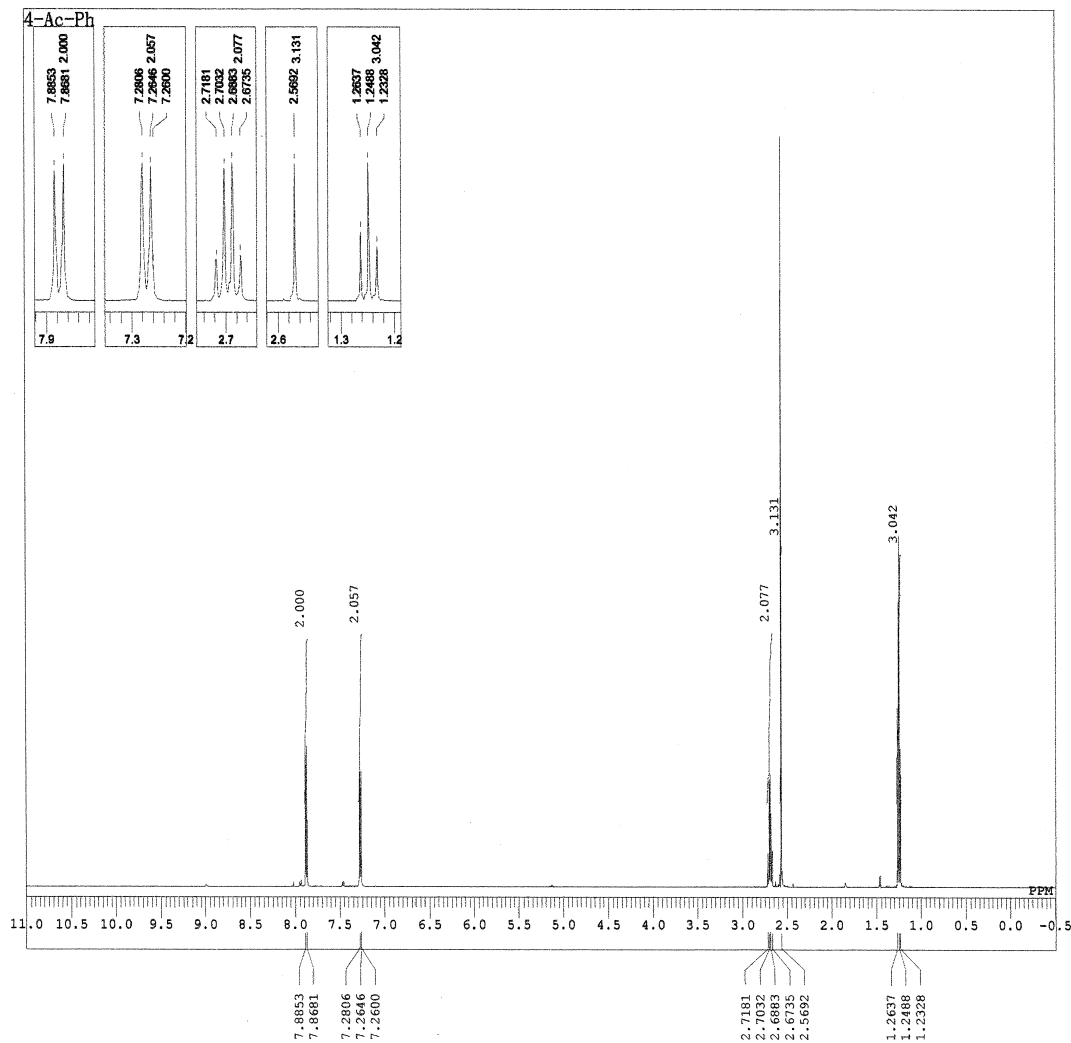

DFILE ozawa10-046\_SM\_1H.als  
 COMNT 4-Ac-Ph  
 DATIM 2016-11-28 16:02:25  
 OBNUC 1H  
 EXMOD proton.jxp  
 OBFRQ 500.16 MHz  
 OBSET 2.41 KHz  
 OBFIN 6.01 Hz  
 POINT 13107  
 FREQU 7507.51 Hz  
 SCANS 4  
 ACQTM 1.7459 sec  
 PD 5.0000 sec  
 PW1 5.55 usec  
 IRNUC 1H  
 CTEMP 21.3 c  
 SLVNT CDCL3  
 EXREF 7.26 ppm  
 BF 0.12 Hz  
 RGAIN 28

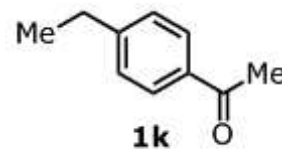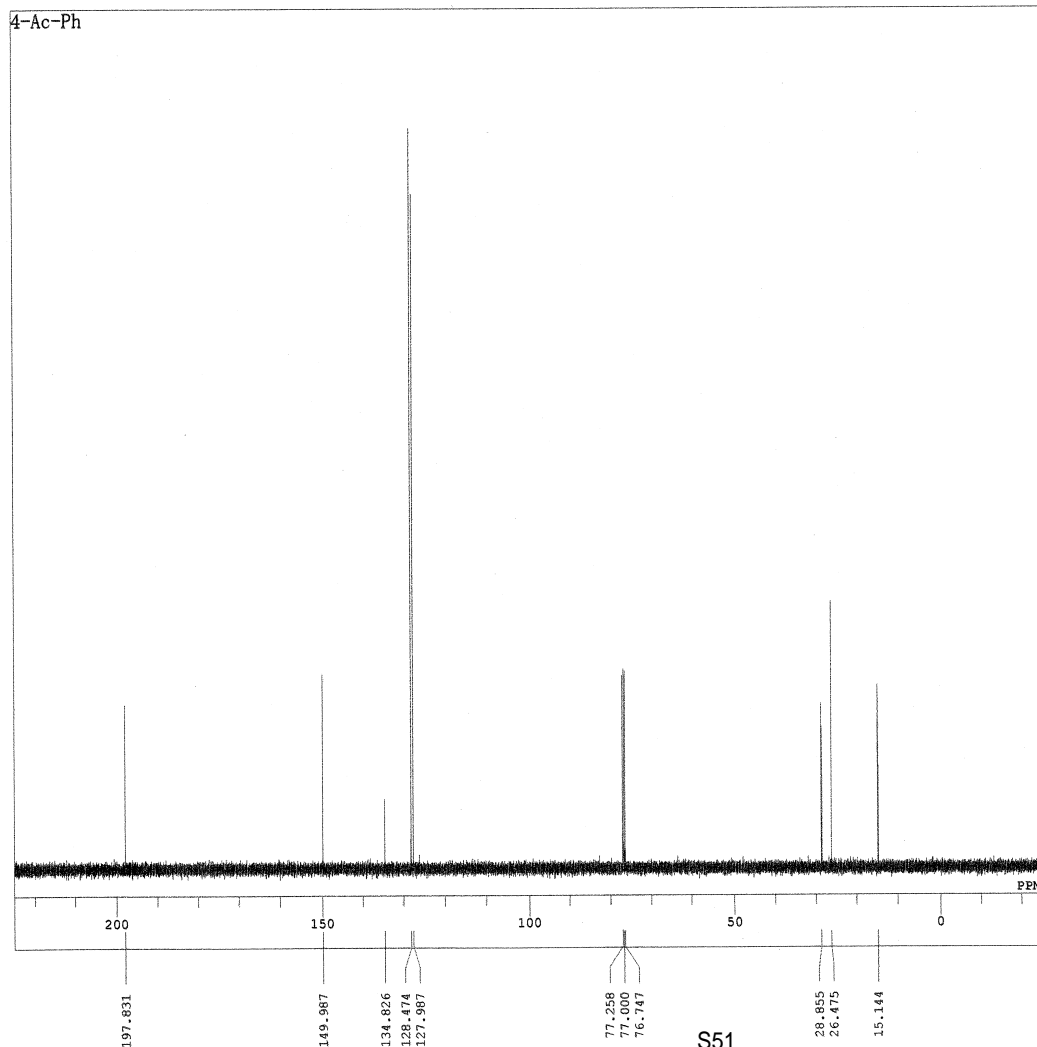

DFILE ozawa10-046\_SM\_13C.jdf  
 COMNT 4-Ac-Ph  
 DATIM 2016-11-28 16:04:20  
 OBNUC 13C  
 EXMOD carbon.jxp  
 OBFRQ 125.77 MHz  
 OBSET 7.87 KHz  
 OBFIN 4.21 Hz  
 POINT 65535  
 FREQU 39308.18 Hz  
 SCANS 20  
 ACQTM 1.6672 sec  
 PD 2.0000 sec  
 PW1 3.40 usec  
 IRNUC 1H  
 CTEMP 21.3 c  
 SLVNT CDCL3  
 EXREF 77.00 ppm  
 BF 0.12 Hz  
 RGAIN 58

4-Ac-Ph

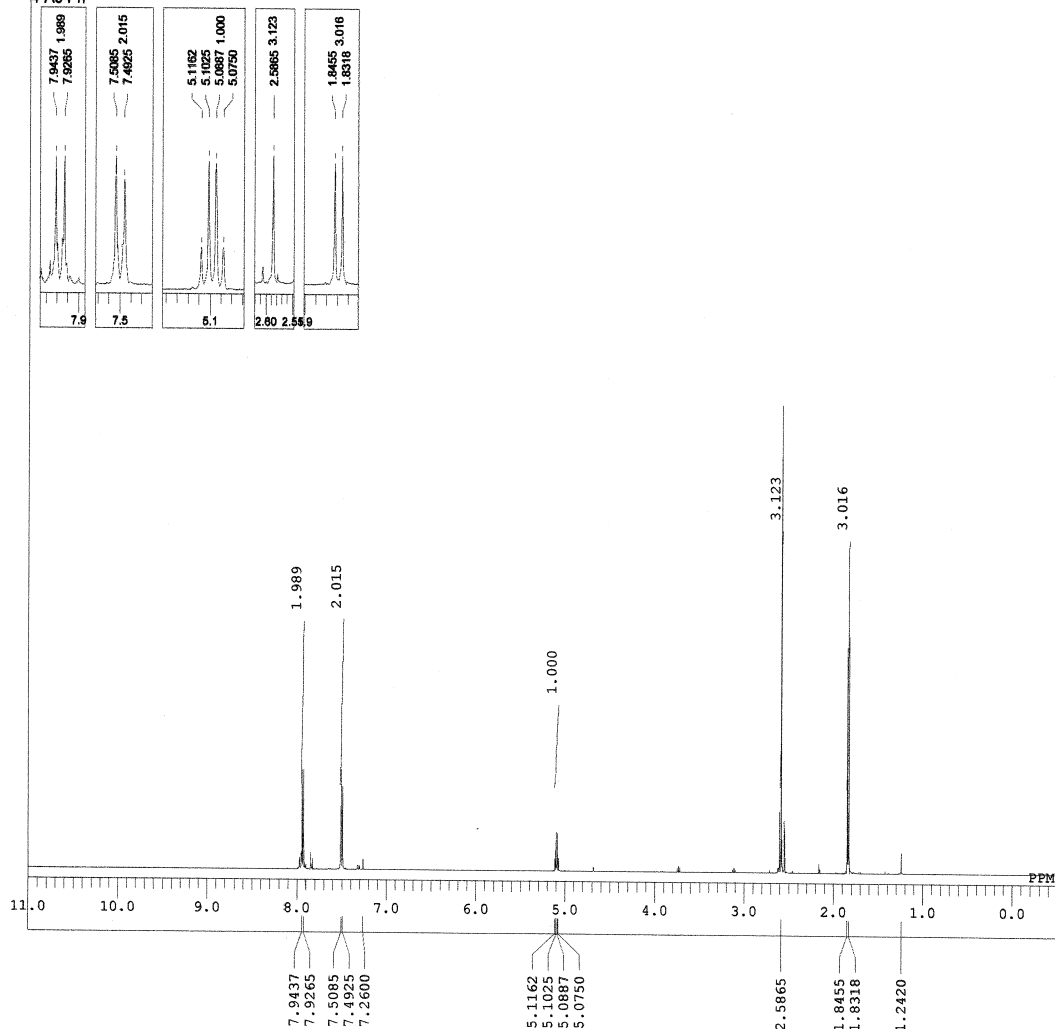

DFILE ozawa10-046\_1H.jdf  
 COMNT 4-Ac-Ph  
 DATIM 2016-11-30 13:21:09  
 OBNUC 1H  
 EXMOD proton.jxp  
 OBFRQ 500.16 MHz  
 OBSET 2.41 KHz  
 OBFIN 6.01 Hz  
 POINT 16384  
 FREQU 9384.38 Hz  
 SCANS 4  
 ACQTM 1.7459 sec  
 PD 5.0000 sec  
 PW1 5.55 usec  
 IRNUC 1H  
 CTEMP 21.0 c  
 SLVNT CDCL3  
 EXREF 7.26 ppm  
 BF 0.12 Hz  
 RGAIN 28

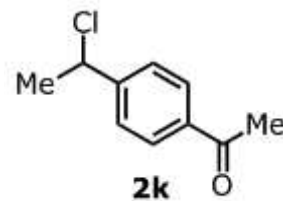

4-Ac-Ph

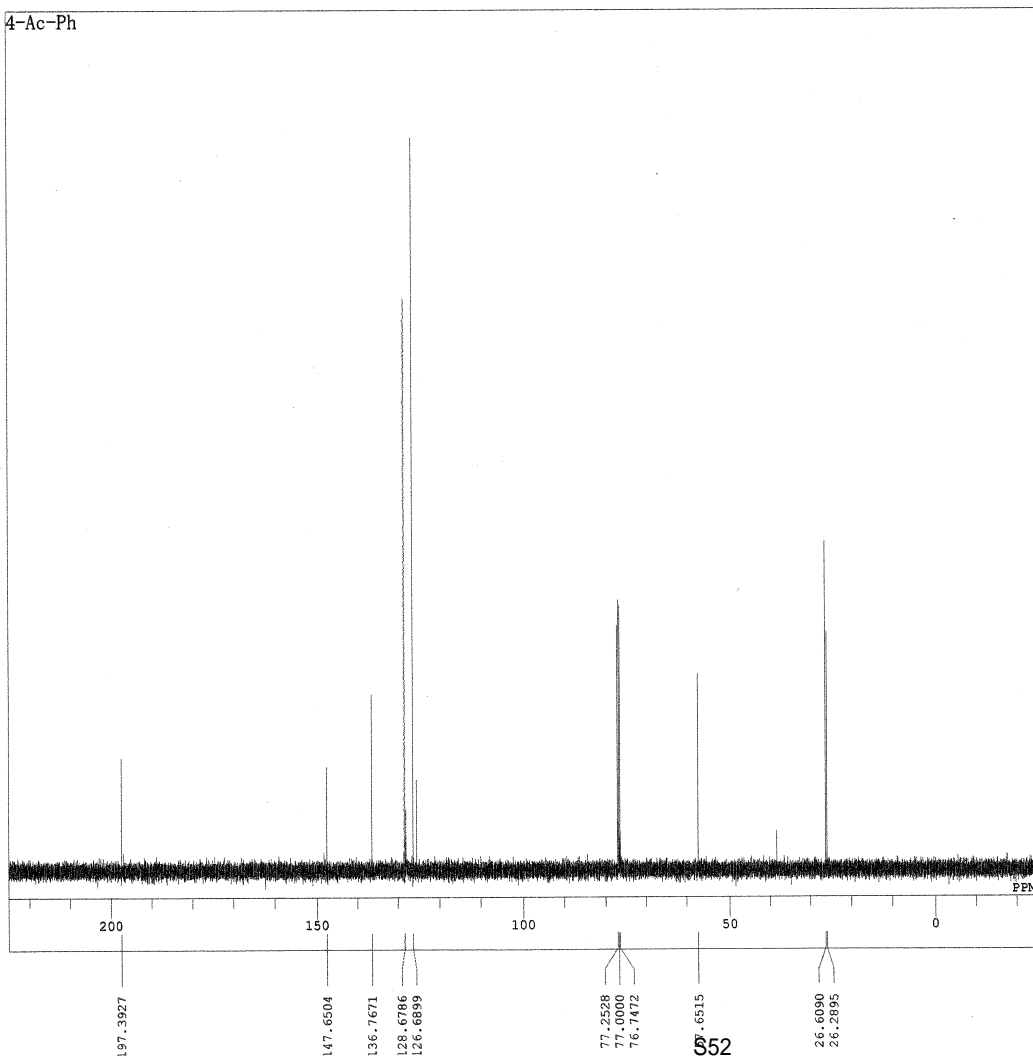

DFILE ozawa10-046\_13C.jdf  
 COMNT 4-Ac-Ph  
 DATIM 2016-11-30 13:22:13  
 OBNUC 13C  
 EXMOD carbon.jxp  
 OBFRQ 125.77 MHz  
 OBSET 7.87 KHz  
 OBFIN 4.21 Hz  
 POINT 65535  
 FREQU 39308.18 Hz  
 SCANS 16  
 ACQTM 1.6672 sec  
 PD 2.0000 sec  
 PW1 3.40 usec  
 IRNUC 1H  
 CTEMP 21.1 c  
 SLVNT CDCL3  
 EXREF 77.00 ppm  
 BF 0.12 Hz  
 RGAIN 58



## 5-methylhexanoic acid

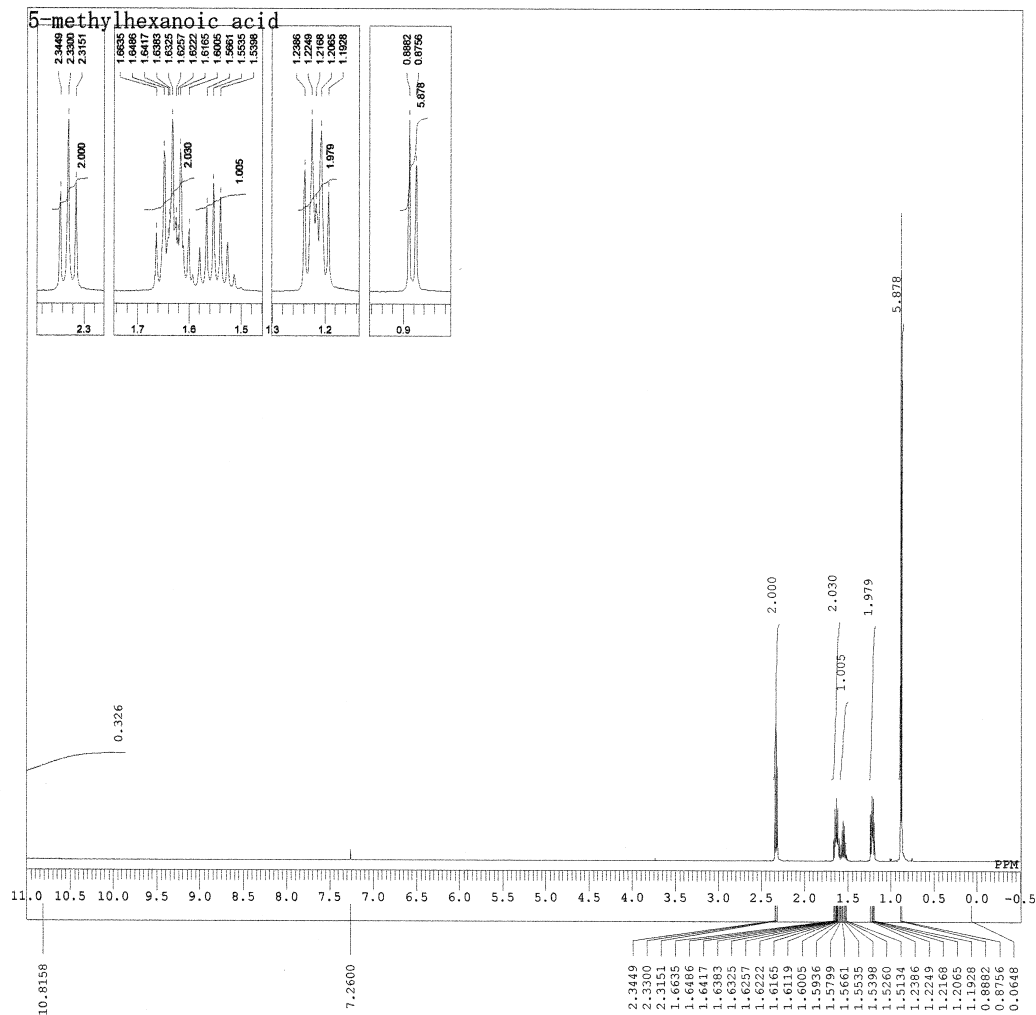

DFILE 5-methylhexanoic acid\_1H.jdf  
 COMNT 5-methylhexanoic acid  
 DATIM 2015-08-25 12:34:05  
 OBNUC 1H  
 EXMOD proton.jxp  
 OBFREQ 500.16 MHz  
 OBSET 2.41 KHz  
 OBFIN 6.01 Hz  
 POINT 16384  
 FREQU 9384.38 Hz  
 SCANS 4  
 ACQTM 1.7459 sec  
 PD 5.0000 sec  
 PW1 5.55 usec  
 IRNUC 1H  
 CTEMP 21.3 c  
 SLVNT CDCL3  
 EXREF 7.26 ppm  
 BF 0.12 Hz  
 RGAIN 30

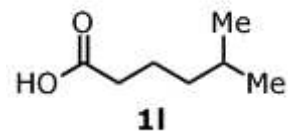

## 5-methylhexanoic acid

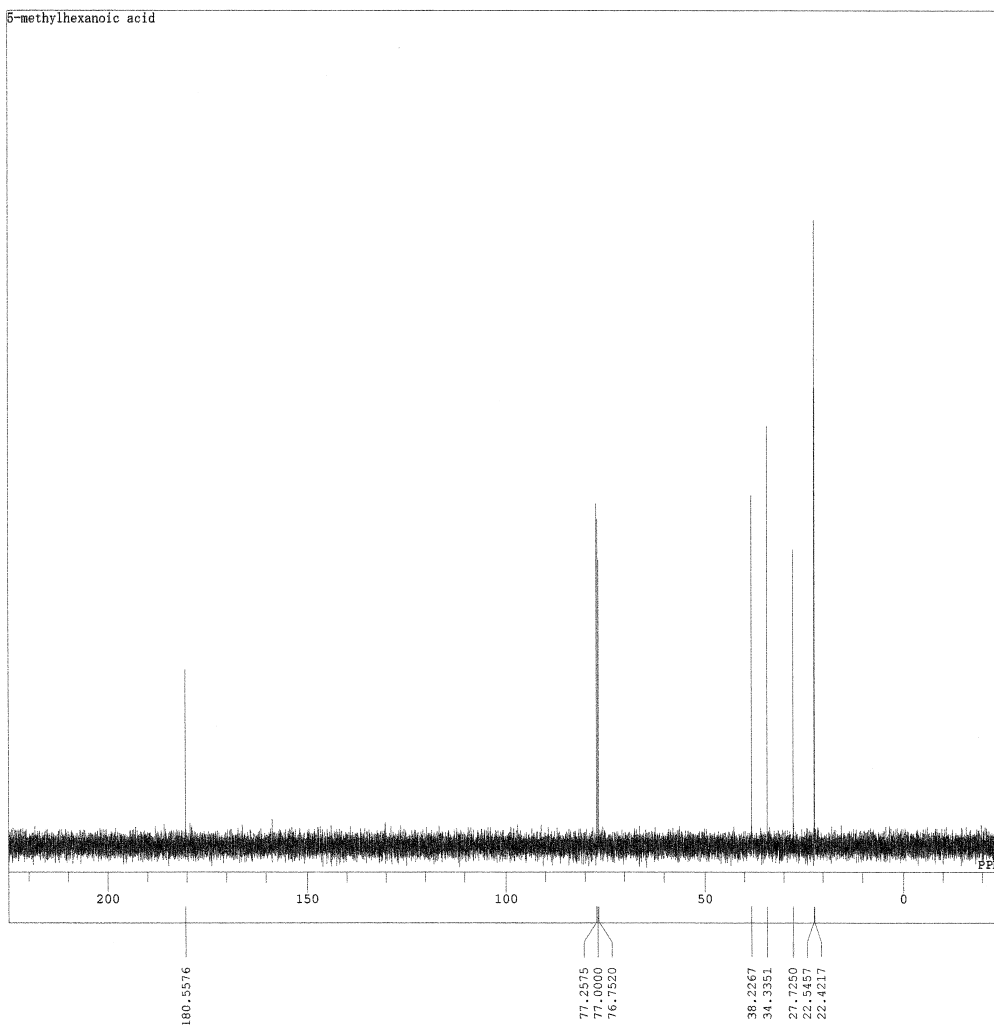

DFILE 5-methylhexanoic acid\_13C.jdf  
 COMNT 5-methylhexanoic acid  
 DATIM 2015-08-25 12:35:07  
 OBNUC 13C  
 EXMOD carbon.jxp  
 OBFREQ 125.77 MHz  
 OBSET 7.87 KHz  
 OBFIN 4.21 Hz  
 POINT 32767  
 FREQU 39308.18 Hz  
 SCANS 12  
 ACQTM 0.8336 sec  
 PD 2.0000 sec  
 PW1 3.40 usec  
 IRNUC 1H  
 CTEMP 21.4 c  
 SLVNT CDCL3  
 EXREF 77.00 ppm  
 BF 0.12 Hz  
 RGAIN 60

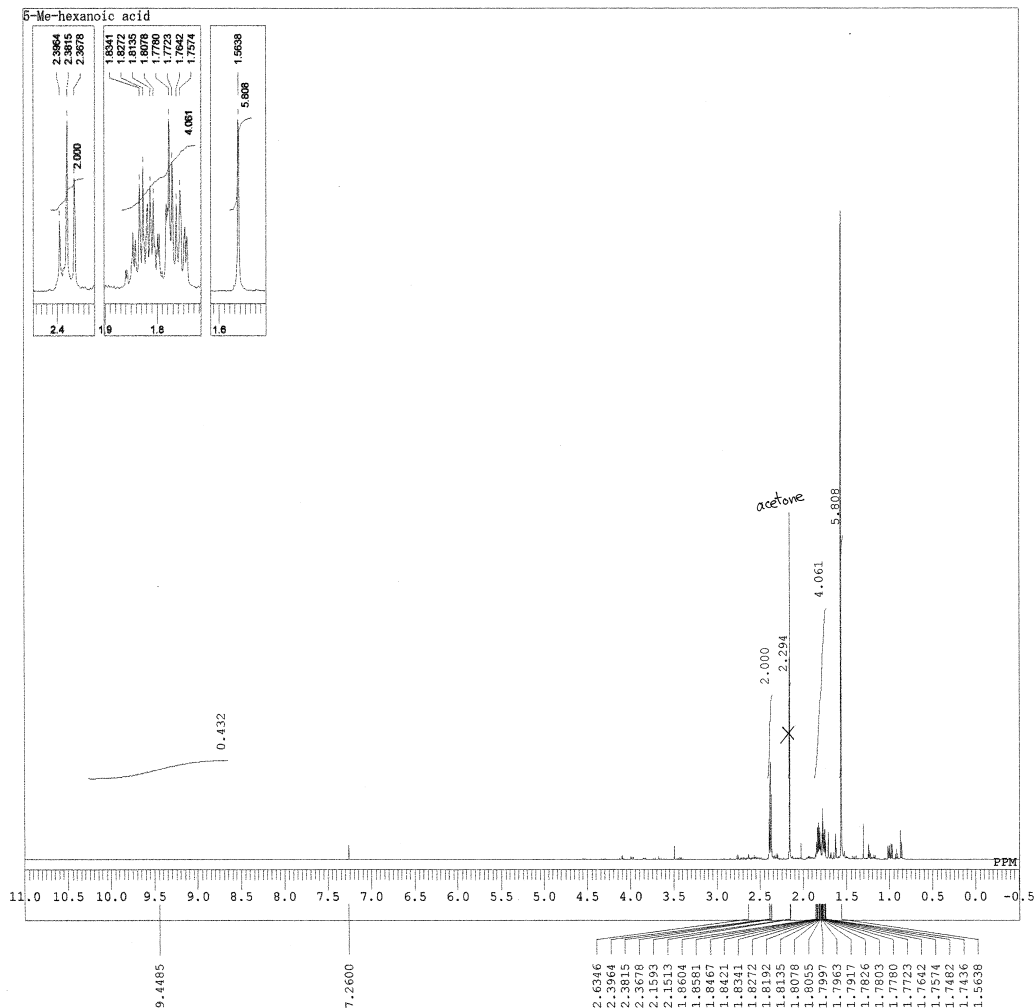

DFILE ozawa08-076\_1H.jdf  
 COMNT 5-Me-hexanoic acid  
 DATIM 2015-08-25 12:43:19  
 OBNUC 1H  
 EXMOD proton.jxp  
 OBFRQ 500.16 MHz  
 OBSET 2.41 KHz  
 OBFIN 6.01 Hz  
 POINT 16384  
 FREQU 9384.38 Hz  
 SCANS 4  
 ACQTM 1.7459 sec  
 PD 5.0000 sec  
 PW1 5.55 usec  
 IRNUC 1H  
 CTEMP 21.2 c  
 SLVNT CDCL3  
 EXREF 7.26 ppm  
 BF 0.12 Hz  
 RGAIN 28

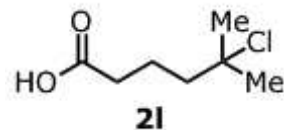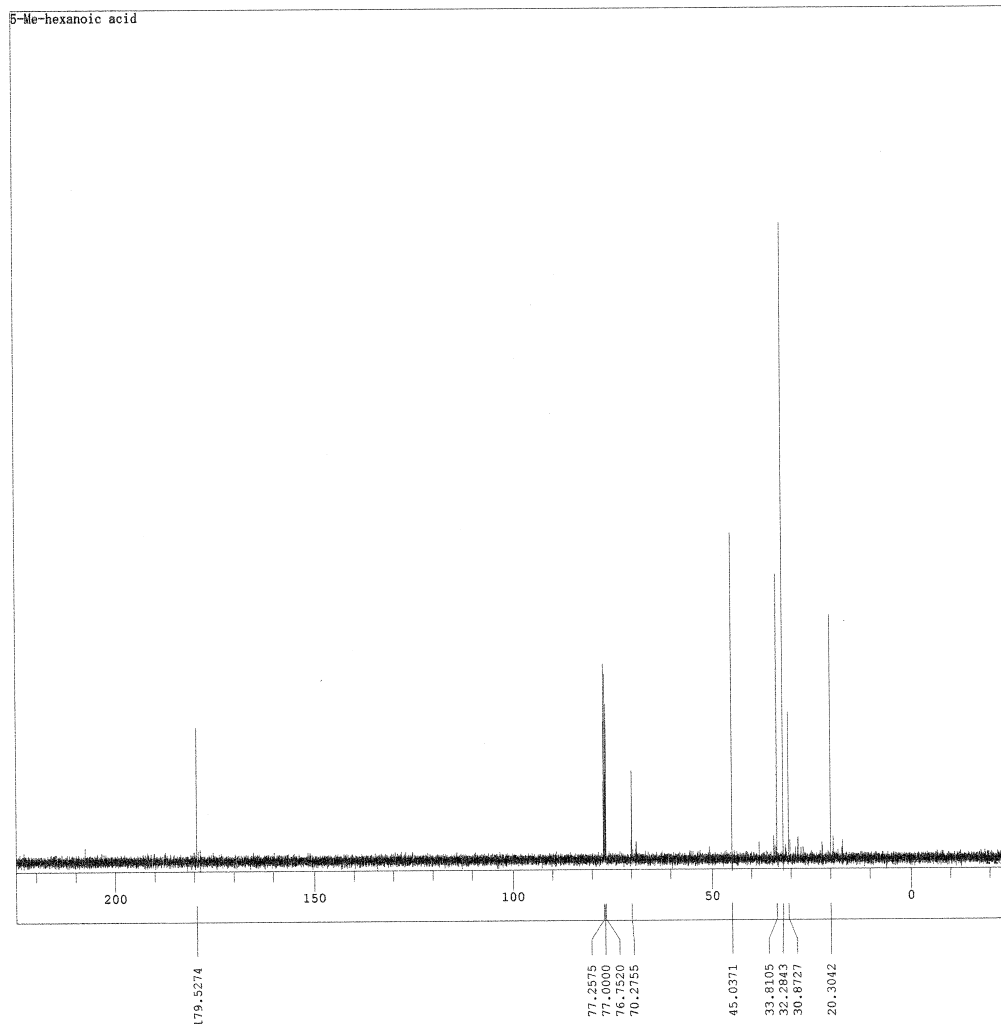

DFILE ozawa08-076\_13C.jdf  
 COMNT 5-Me-hexanoic acid  
 DATIM 2015-08-25 12:44:22  
 OBNUC 13C  
 EXMOD carbon.jxp  
 OBFRQ 125.77 MHz  
 OBSET 7.87 KHz  
 OBFIN 4.21 Hz  
 POINT 32767  
 FREQU 39308.18 Hz  
 SCANS 32  
 ACQTM 0.8336 sec  
 PD 2.0000 sec  
 PW1 3.40 usec  
 IRNUC 1H  
 CTEMP 21.5 c  
 SLVNT CDCL3  
 EXREF 77.00 ppm  
 BF 0.12 Hz  
 RGAIN 60

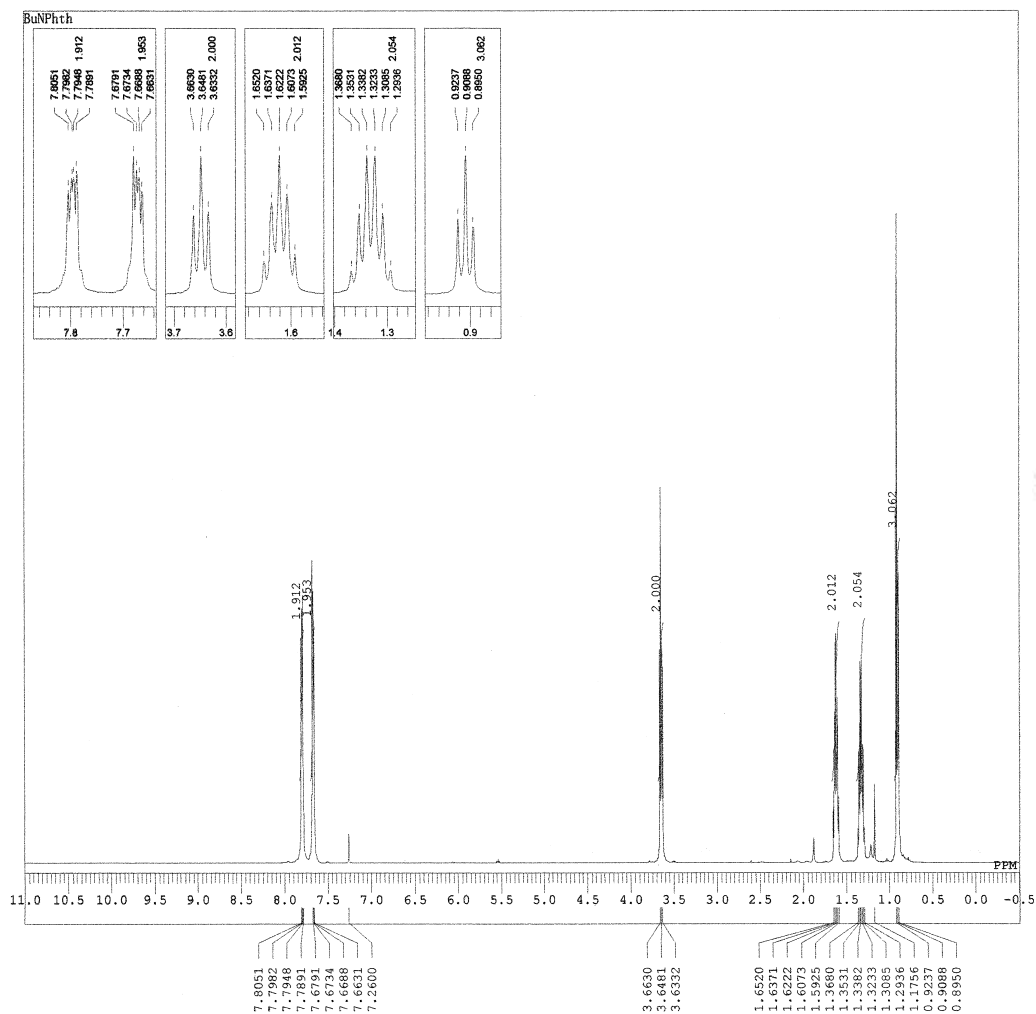

DFILE ozawa09-065\_rsm\_1h.jdf  
 COMNT BuNPhth  
 DATIM 2015-12-24 17:06:28  
 OBNUC 1H  
 EXMOD proton.jxp  
 OBFRQ 500.16 MHz  
 OBSET 2.41 KHz  
 OBFIN 6.01 Hz  
 POINT 16384  
 FREQU 9384.38 Hz  
 SCANS 4  
 ACQTM 1.7459 sec  
 PD 5.0000 sec  
 PW1 5.55 usec  
 IRNUC 1H  
 CTEMP 33.8 c  
 SLVNT CDCL3  
 EXREF 7.26 ppm  
 BF 1.20 Hz  
 RGAIN 24

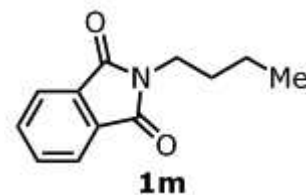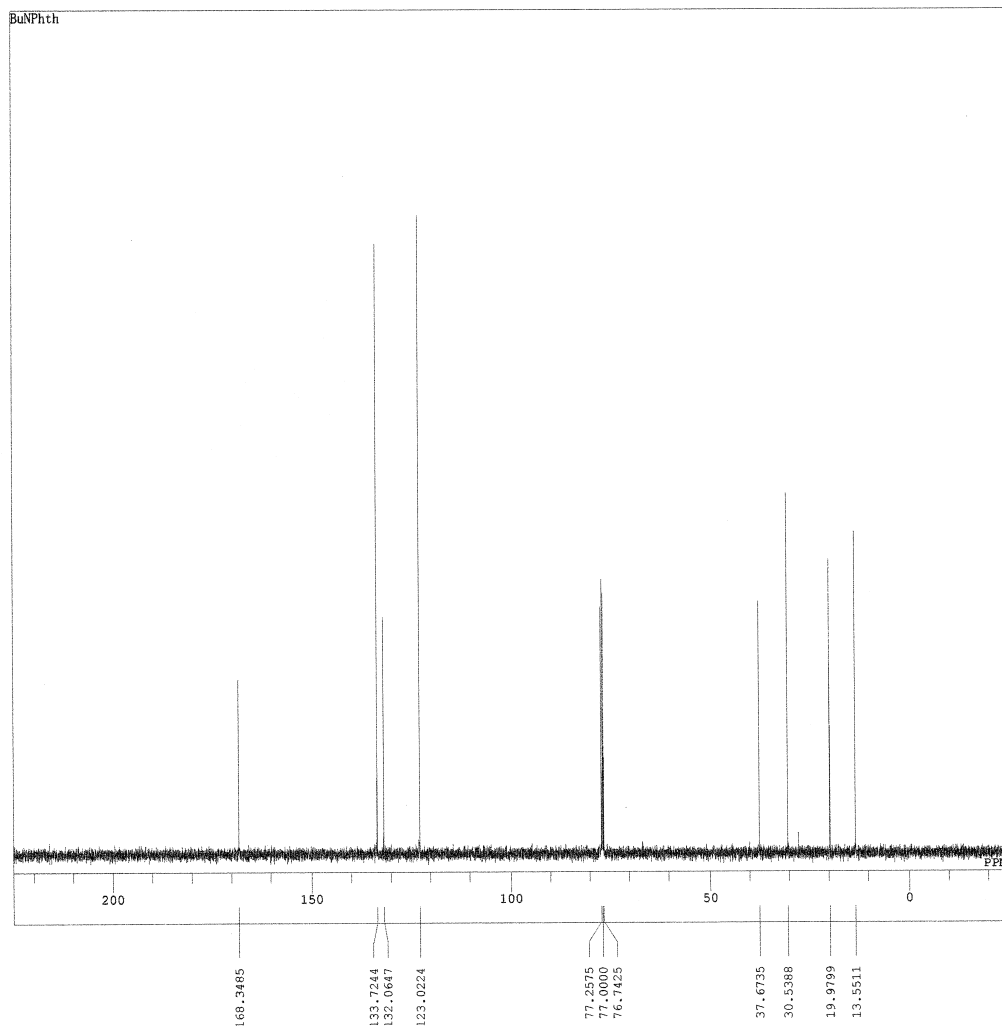

DFILE ozawa09-065\_rsm\_13c.jdf  
 COMNT BuNPhth  
 DATIM 2015-12-24 17:07:35  
 OBNUC 13C  
 EXMOD carbon.jxp  
 OBFRQ 125.77 MHz  
 OBSET 7.87 KHz  
 OBFIN 4.21 Hz  
 POINT 32767  
 FREQU 39308.18 Hz  
 SCANS 17  
 ACQTM 0.8336 sec  
 PD 2.0000 sec  
 PW1 3.40 usec  
 IRNUC 1H  
 CTEMP 30.0 c  
 SLVNT CDCL3  
 EXREF 77.00 ppm  
 BF 1.20 Hz  
 RGAIN 60

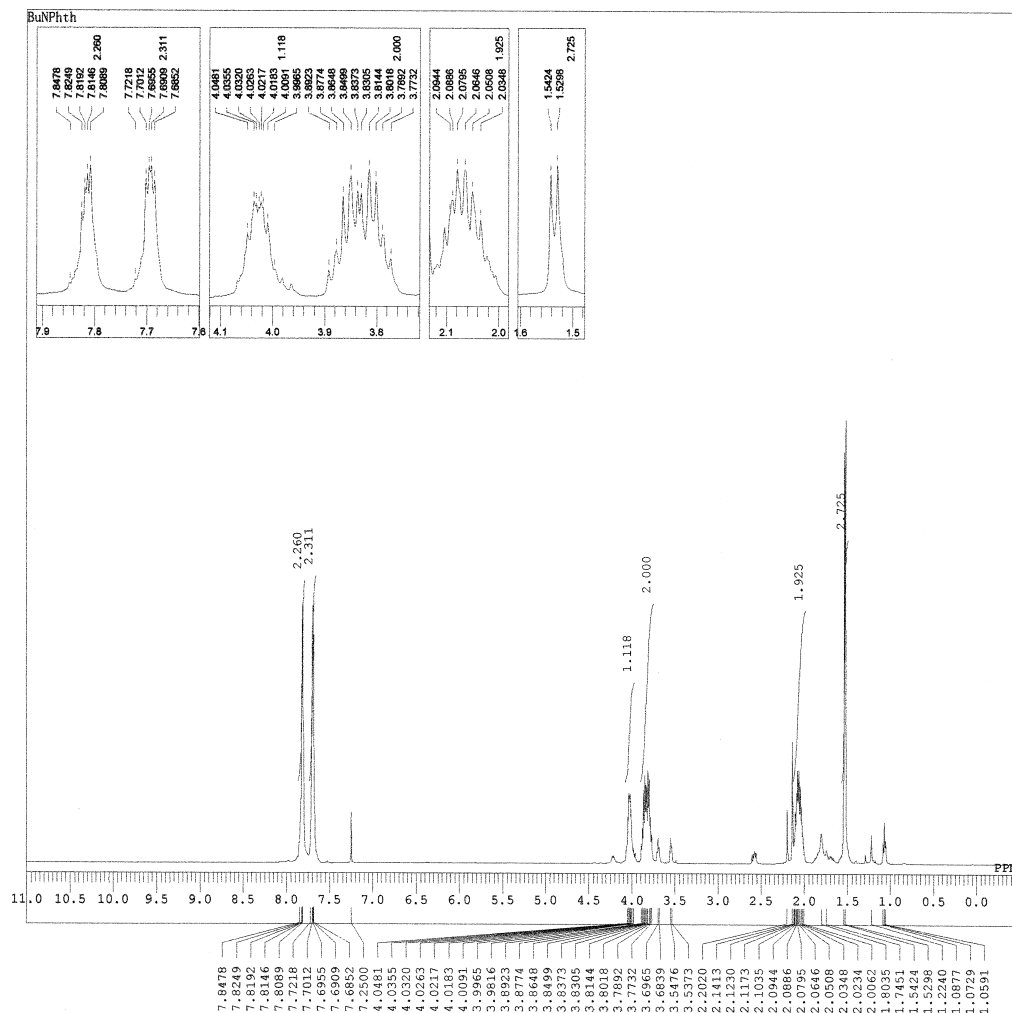

DFILE ozawa09-065\_1h.jdf  
 COMMT BuNPhth  
 DATIM 2015-12-24 16:59:35  
 OBNUC 1H  
 EXMOD proton.jxp  
 OBFRQ 500.16 MHz  
 OBSET 2.41 KHz  
 OBFIN 6.01 Hz  
 POINT 16384  
 FREQU 9384.38 Hz  
 SCANS 4  
 ACQTM 1.7459 sec  
 PD 5.0000 sec  
 PW1 5.55 usec  
 IRNUC 1H  
 CTEMP 31.9 c  
 SLVNT CDCL3  
 EXREF 7.25 ppm  
 BF 1.20 Hz  
 RGAIN 26

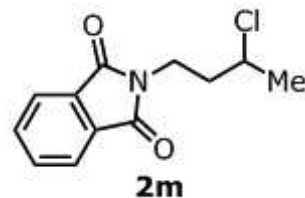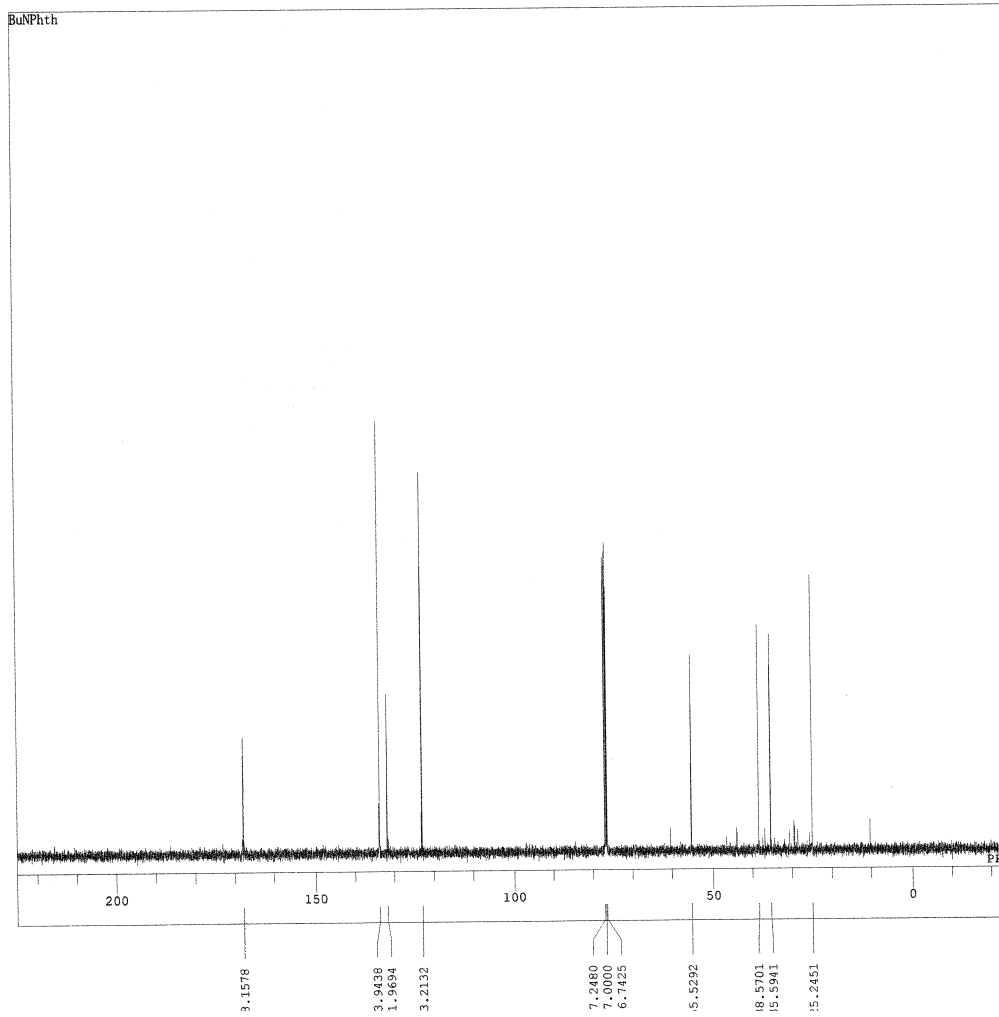

DFILE ozawa09-065\_13c.jdf  
 COMMT BuNPhth  
 DATIM 2015-12-24 17:00:37  
 OBNUC 13C  
 EXMOD carbon.jxp  
 OBFRQ 125.77 MHz  
 OBSET 7.87 KHz  
 OBFIN 4.21 Hz  
 POINT 32767  
 FREQU 39308.18 Hz  
 SCANS 60  
 ACQTM 0.8336 sec  
 PD 2.0000 sec  
 PW1 3.40 usec  
 IRNUC 1H  
 CTEMP 33.3 c  
 SLVNT CDCL3  
 EXREF 77.00 ppm  
 BF 1.20 Hz  
 RGAIN 60

4-OAc-Ph, CO2Me

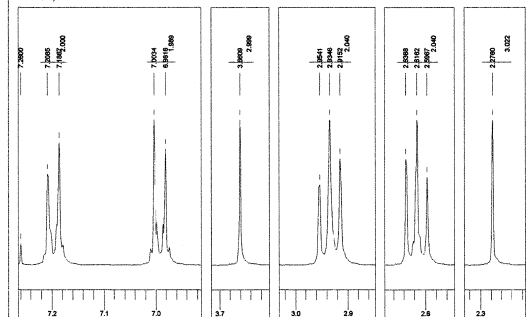

DFILE ozawa09-016\_1H.jdf  
 COMNT 4-OAc-Ph, CO2Me  
 DATIM 18-11-2015 17:55:28  
 CNUC 1H  
 EXMOD proton.jxp  
 OBFQ 391.78 MHz  
 OBSE 0.51 kHz  
 OBFIN 3.34 Hz  
 POINT 16384  
 FREQ 7352.94 Hz  
 SCANS 4  
 ACQTM 2.2282 sec  
 PD 5.0000 sec  
 FW 4.99 usec  
 IRNUC 1H  
 CTMP 20.1 c  
 SLVN CDCL3  
 EXREF 7.26 ppm  
 BF 0.12 Hz  
 RGAIN 26

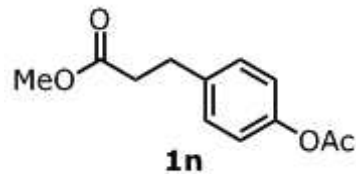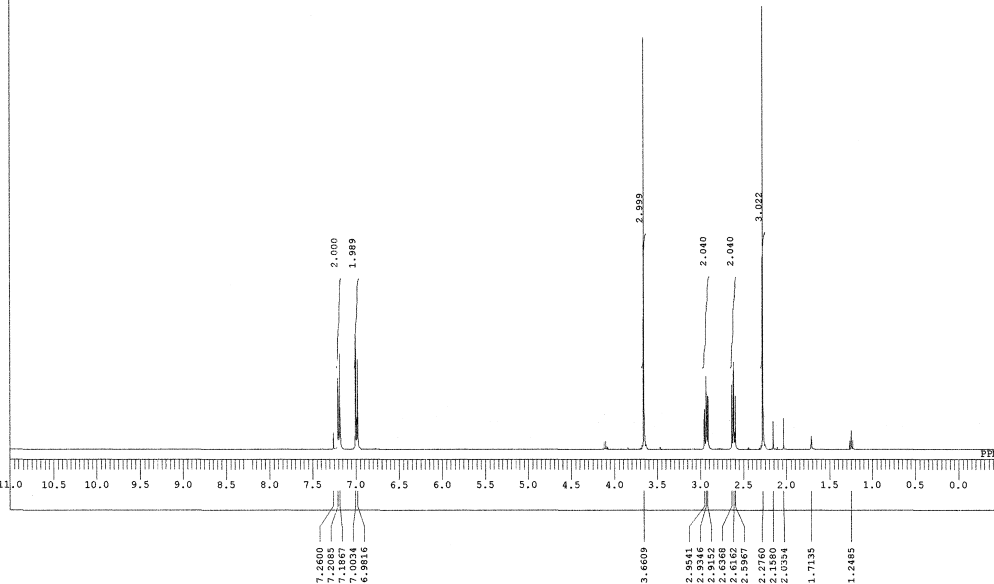

4-OAc-Ph, CO2Me

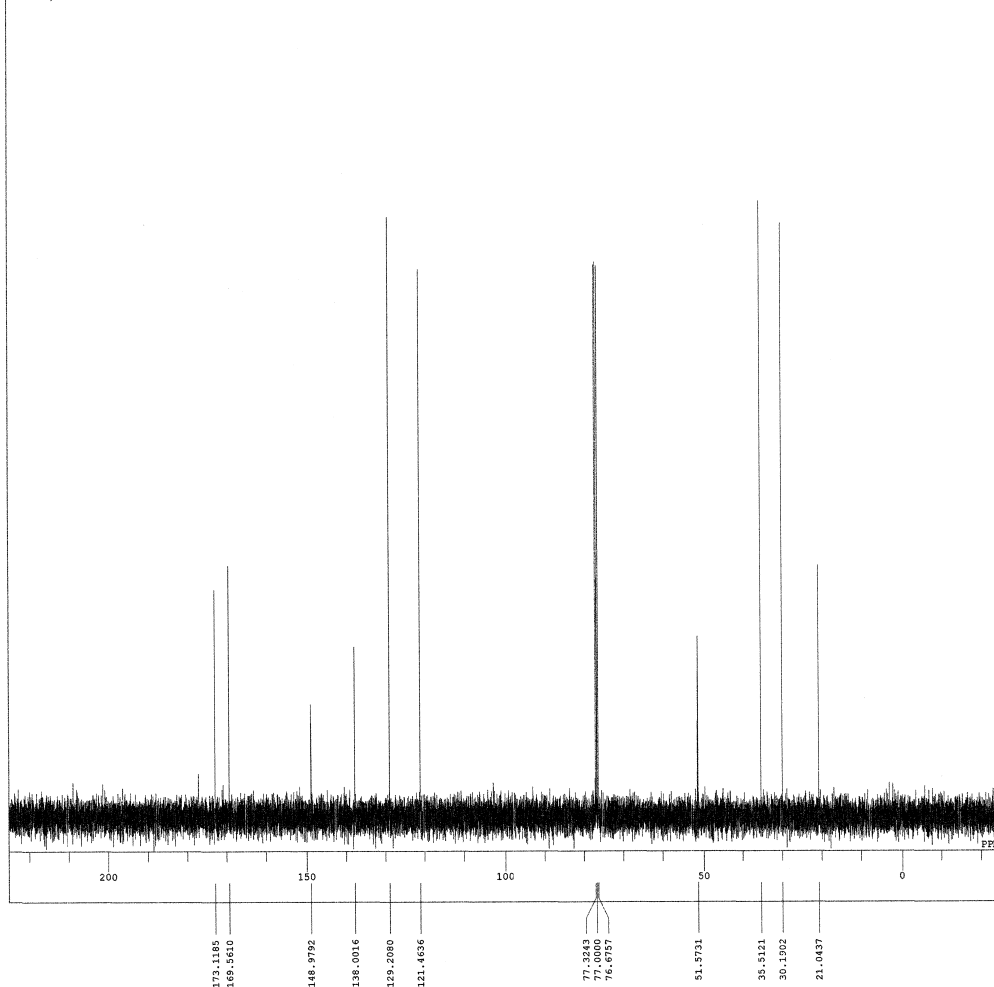

DFILE ozawa09-016\_13C.jdf  
 COMNT 4-OAc-Ph, CO2Me  
 DATIM 18-11-2015 17:56:31  
 CNUC 13C  
 EXMOD carbon.jxp  
 OBFQ 98.52 MHz  
 OBSE 4.64 kHz  
 OBFIN 8.74 Hz  
 POINT 32767  
 FREQ 30788.15 Hz  
 SCANS 44  
 ACQTM 1.0643 sec  
 PD 2.0000 sec  
 FW 3.16 usec  
 IRNUC 13C  
 CTMP 20.3 c  
 SLVN CDCL3  
 EXREF 77.00 ppm  
 BF 0.12 Hz  
 RGAIN 60

4-OAc-Ph, CO2Me

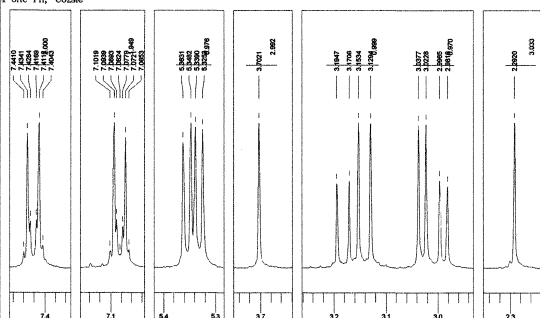

DFILE ozawa09-019\_1H.jdf  
 COMNT 4-OAc-Ph, CO2Me  
 DATIM 18-11-2015 18:01:12  
 OBNUC 1H  
 EXMOD proton.jxp  
 OBFREQ 391.78 MHz  
 OBSF 8.51 KHz  
 OBFIN 3.34 Hz  
 POINT 16384  
 FREQ 7352.94 Hz  
 SCANS 4  
 ACQTM 2.2282 sec  
 PD 5.0000 sec  
 PW 4.99 usec  
 IRNUC 1H  
 CTMP 20.1 c  
 CDCL3  
 EXREF 7.26 ppm  
 BF 0.12 Hz  
 RGAIN 30

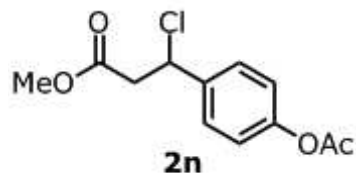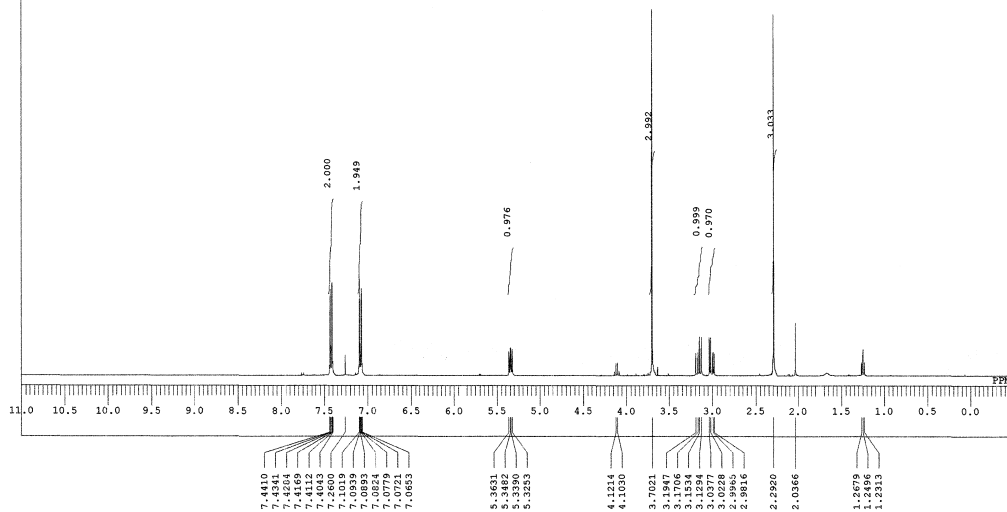

DFILE ozawa09-019\_13C.jdf  
 COMNT 4-OAc-Ph, CO2Me  
 DATIM 18-11-2015 18:02:14  
 OBNUC 13C  
 EXMOD carbon.jxp  
 OBFREQ 98.52 MHz  
 OBSF 4.64 KHz  
 OBFIN 8.74 Hz  
 POINT 32767  
 FREQ 30788.18 Hz  
 SCANS 32  
 ACQTM 1.0643 sec  
 PD 2.0000 sec  
 PW 3.16 usec  
 IRNUC 13C  
 CTMP 20.2 c  
 CDCL3  
 EXREF 77.00 ppm  
 BF 0.12 Hz  
 RGAIN 60

4-OAc-Ph, CO2Me

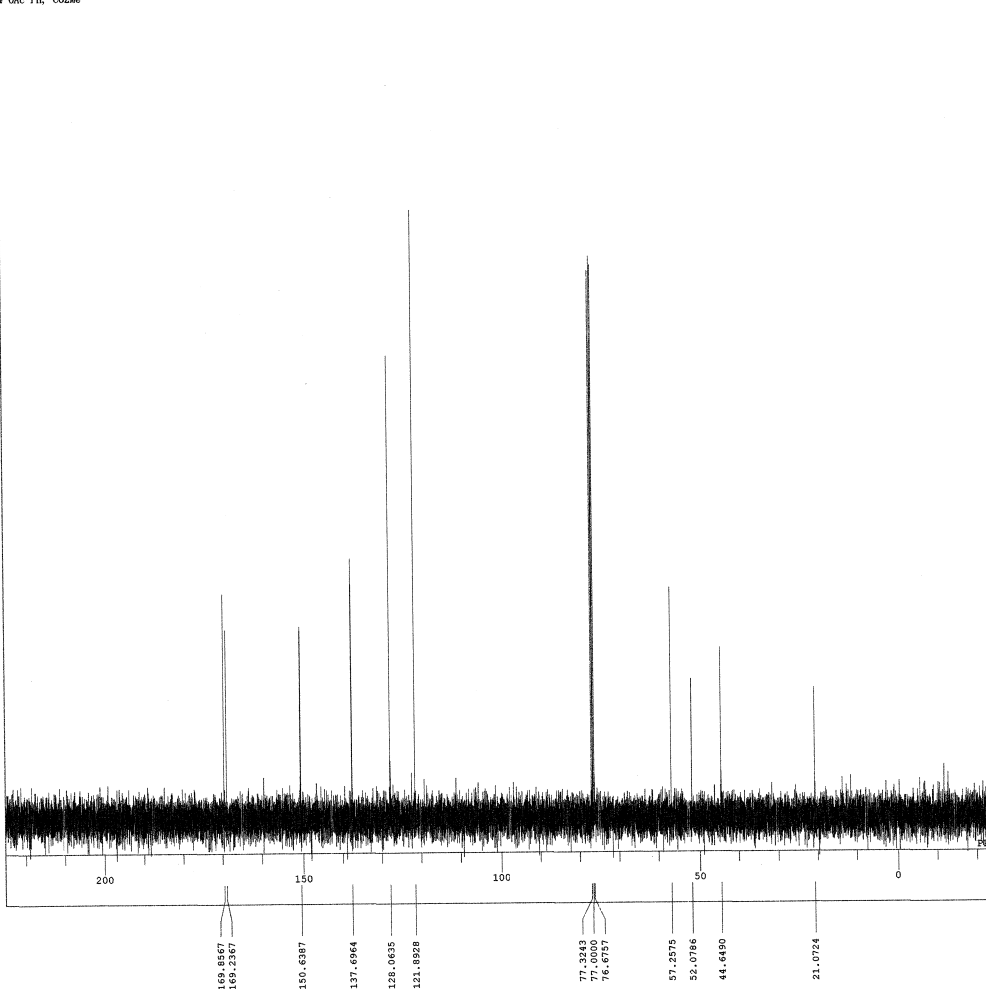

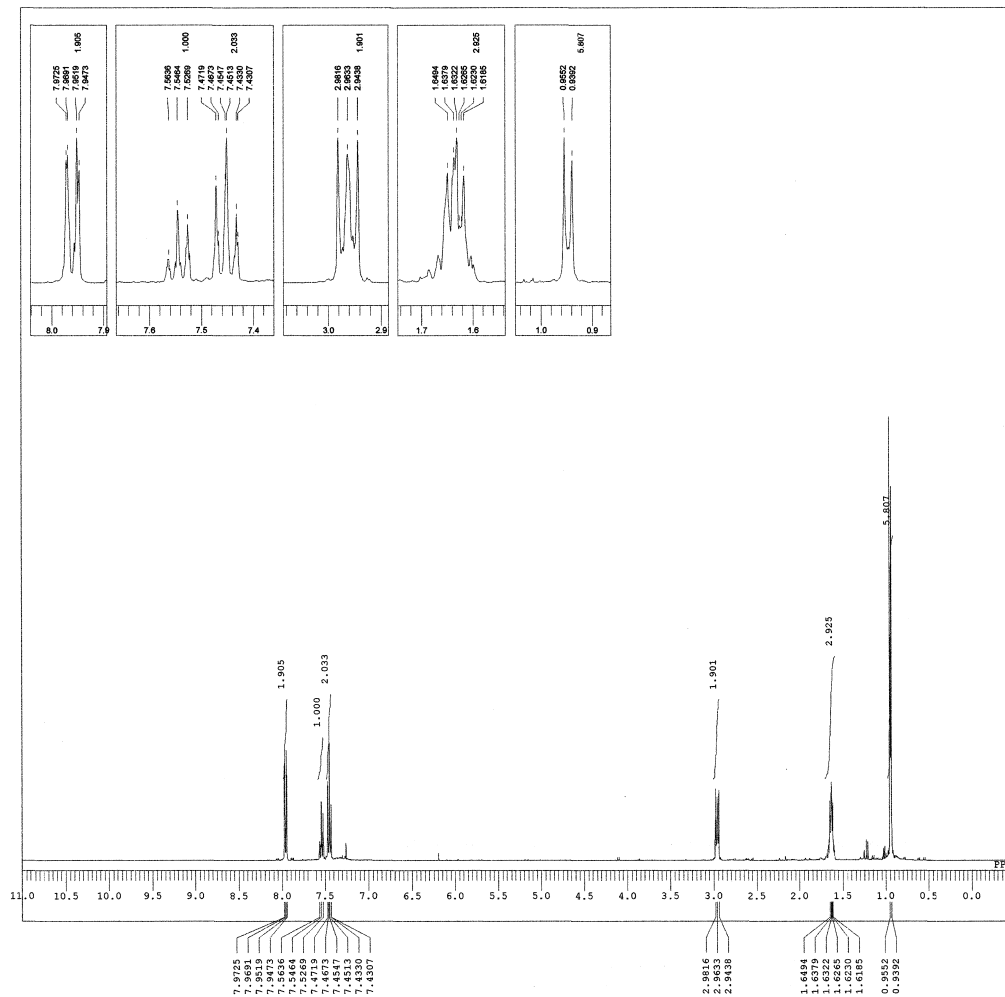

FFILE ozawa09-059\_1H.jdf  
 COMNT  
 DATIM 19-12-2015 17:03:04  
 OBNUC 1H  
 EXMOD proton.jxp  
 OBFRQ 391.78 MHz  
 OBSET 8.51 KHz  
 OBFIN 3.34 Hz  
 POINT 16384  
 FREQU 7352.94 Hz  
 SCANS 4  
 ACQTM 2.2282 sec  
 FD 5.0000 sec  
 PW1 4.99 usec  
 IRNUC 1H  
 CTMPC  
 SLVNT CDCL3  
 EXREF 7.26 ppm  
 BF 0.12 Hz  
 RGAIN 22

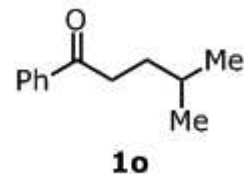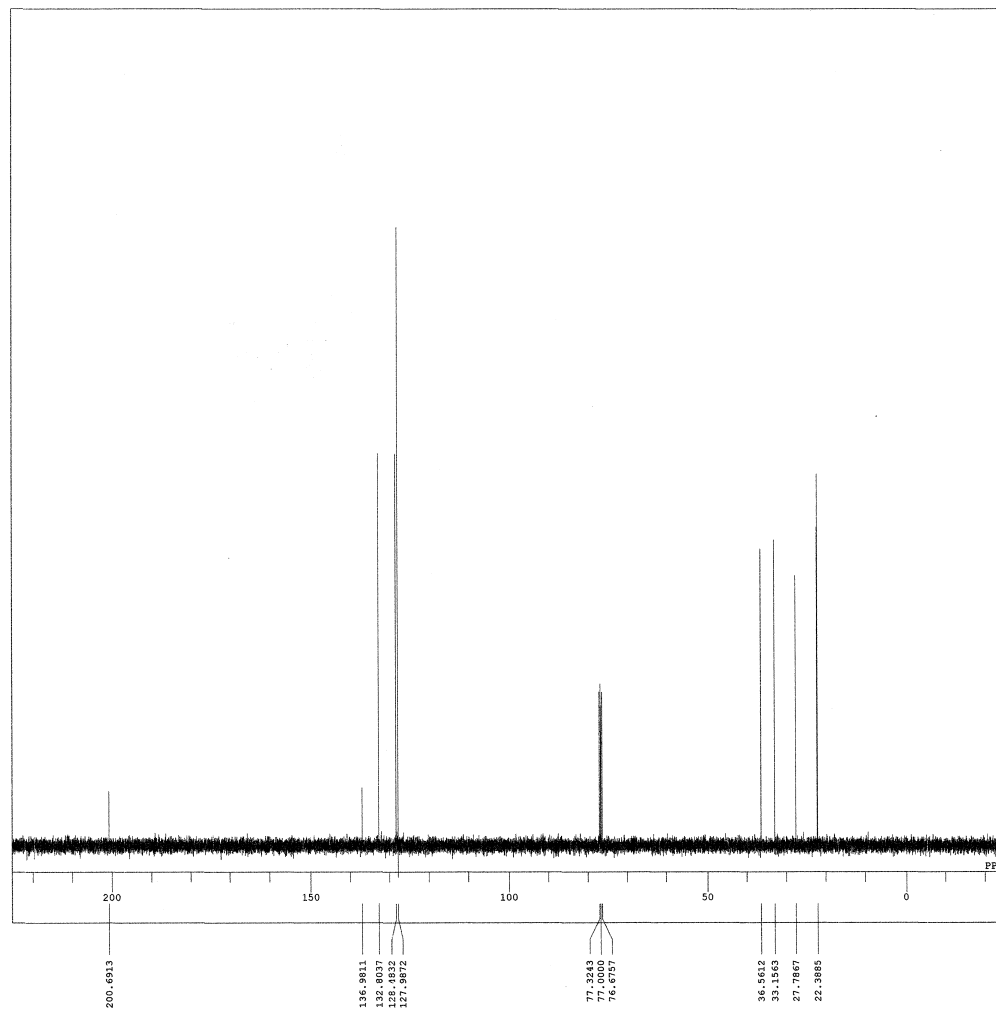

FFILE ozawa09-059\_13C.jdf  
 COMNT  
 DATIM 19-12-2015 17:05:22  
 OBNUC 13C  
 EXMOD carbon.jxp  
 OBFRQ 98.52 MHz  
 OBSET 4.64 KHz  
 OBFIN 8.74 Hz  
 POINT 32767  
 FREQU 30788.18 Hz  
 SCANS 20  
 ACQTM 1.0643 sec  
 FD 2.0000 sec  
 PW1 3.16 usec  
 IRNUC 1H  
 CTMPC  
 SLVNT CDCL3  
 EXREF 77.00 ppm  
 BF 0.12 Hz  
 RGAIN 60

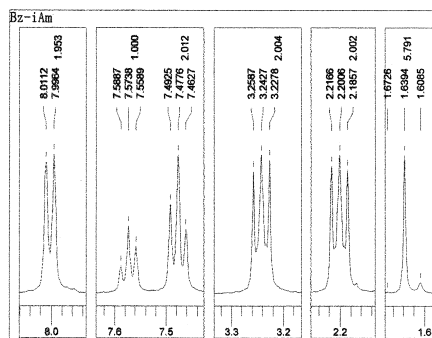

DFILE ozawa09-066\_1h.jdf  
 COMNT Bz-iAm  
 DATIM 2015-12-24 17:13:48  
 OBNUC 1H  
 EXMOD proton.jxp  
 OBFREQ 500.16 MHz  
 OBSETE 2.41 KHz  
 OBFIN 6.01 Hz  
 POINT 16384  
 FREQU 9384.38 Hz  
 SCANS 4  
 ACQTM 1.7459 sec  
 PD 5.0000 sec  
 PW1 5.55 usec  
 IRNUC 1H  
 CTEMP 32.9 c  
 SLVNT CDCL3  
 EXREF 7.26 ppm  
 BF 1.20 Hz  
 RGAIN 30

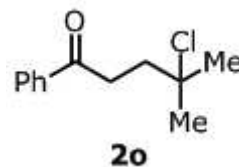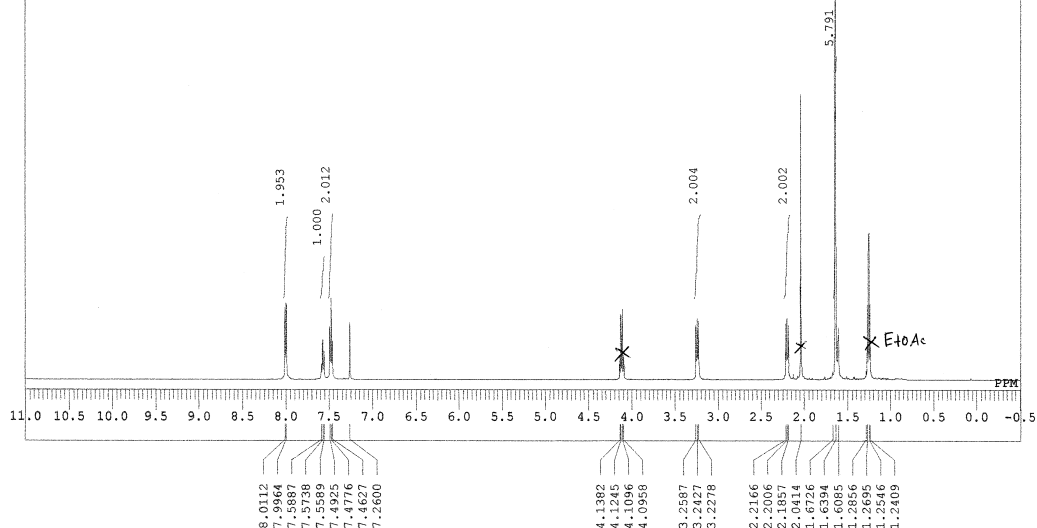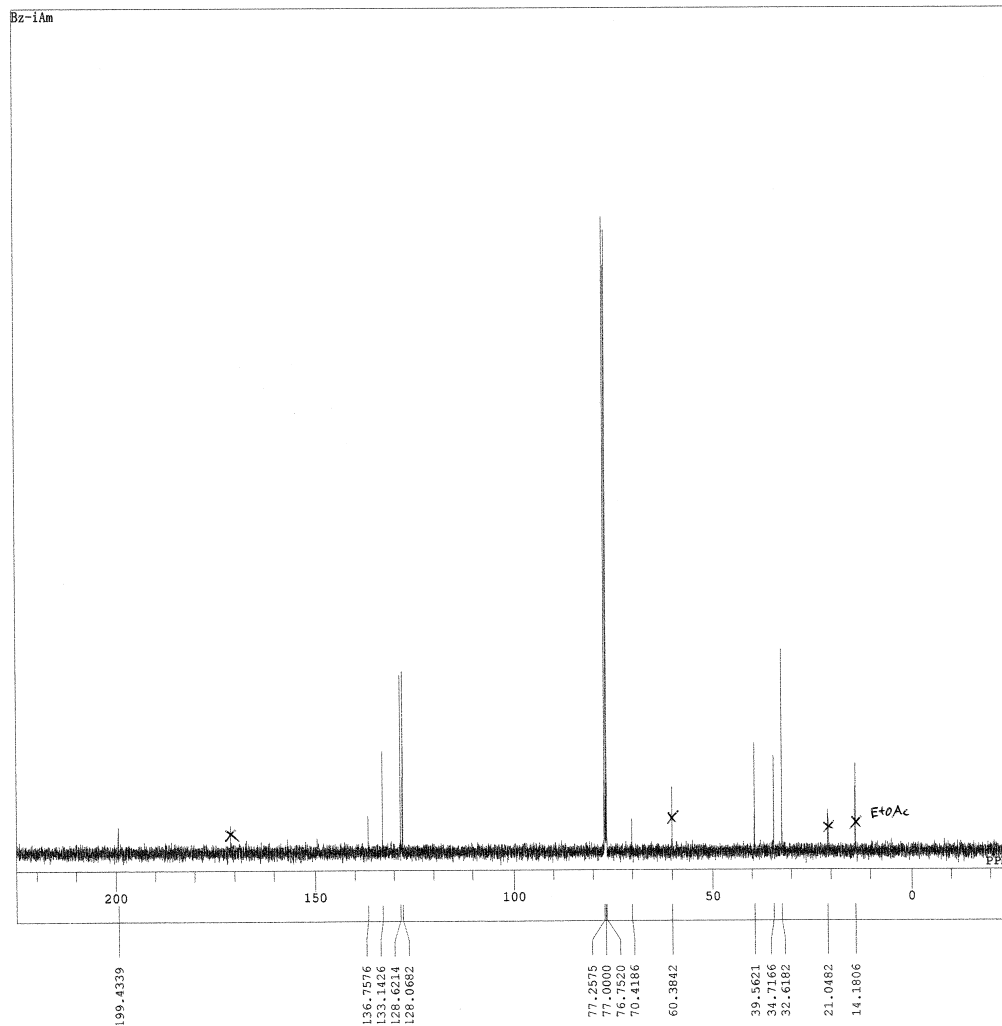

DFILE ozawa09-066\_13c.jdf  
 COMNT Bz-iAm  
 DATIM 2015-12-24 17:15:27  
 OBNUC 13C  
 EXMOD carbon.jxp  
 OBFREQ 125.77 MHz  
 OBSETE 7.87 KHz  
 OBFIN 4.21 Hz  
 POINT 32767  
 FREQU 39308.18 Hz  
 SCANS 112  
 ACQTM 0.8336 sec  
 PD 2.0000 sec  
 PW1 3.40 usec  
 IRNUC 1H  
 CTEMP 30.3 c  
 SLVNT CDCL3  
 EXREF 77.00 ppm  
 BF 1.20 Hz  
 RGAIN 60



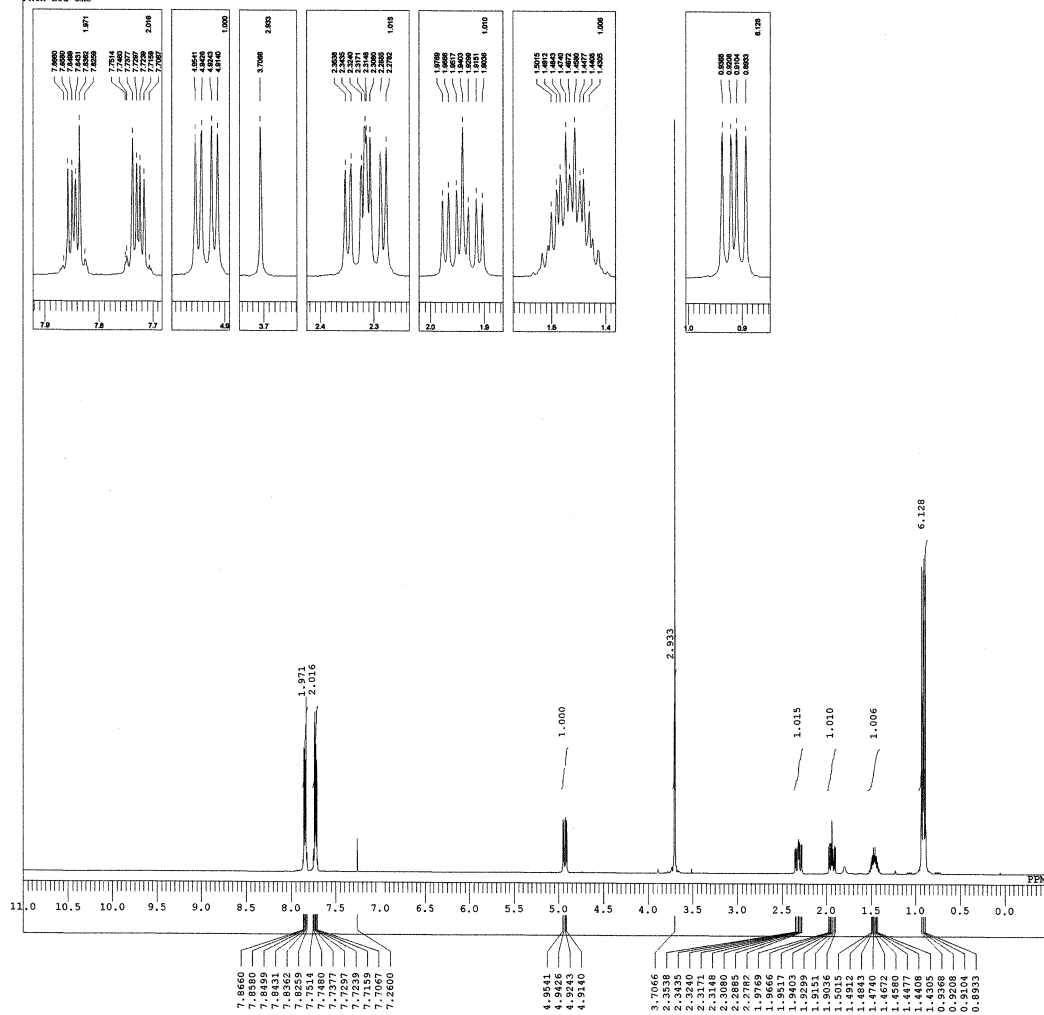

DFILE ozawa09-157\_1H.als  
 COMNT Phth-Leu-OMe  
 DATIM 09-09-2016 16:46:10  
 CNUC 1H  
 EXMOD proton.jxp  
 OBFRQ 391.78 MHz  
 OBSET 8.51 KHz  
 OBFIN 3.34 Hz  
 POINT 13107  
 FREQU 5882.35 Hz  
 SCANS 4  
 ACQTM 2.2282 sec  
 PD 5.0000 sec  
 FW 6.45 usec  
 IRNUC 1H  
 CTMP 460.0 c  
 SLVNT CDCL3  
 EXREF 7.26 ppm  
 BF 0.12 Hz  
 RGAIN 24

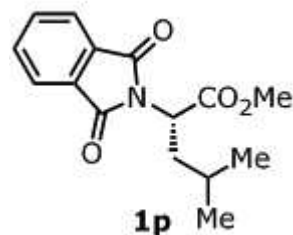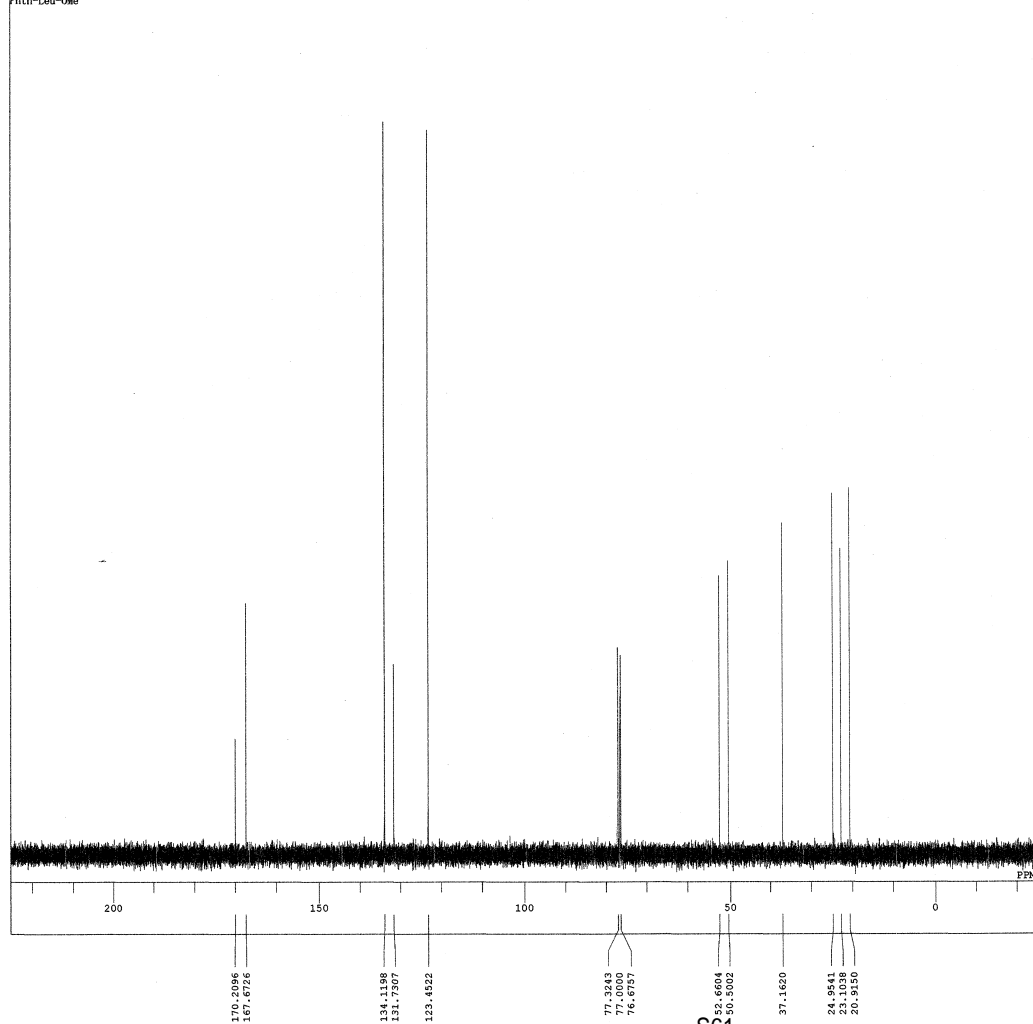

DFILE ozawa09-157\_13C.jdf  
 COMNT Phth-Leu-OMe  
 DATIM 09-09-2016 16:47:38  
 CNUC 13C  
 EXMOD carbon.jxp  
 OBFRQ 98.52 MHz  
 OBSET 4.64 KHz  
 OBFIN 8.74 Hz  
 POINT 65535  
 FREQU 30788.18 Hz  
 SCANS 24  
 ACQTM 2.1286 sec  
 PD 2.0000 sec  
 FW 3.73 usec  
 IRNUC 1H  
 CTMP 460.0 c  
 SLVNT CDCL3  
 EXREF 77.00 ppm  
 BF 0.12 Hz  
 RGAIN 60

Phth-Leu-OMe

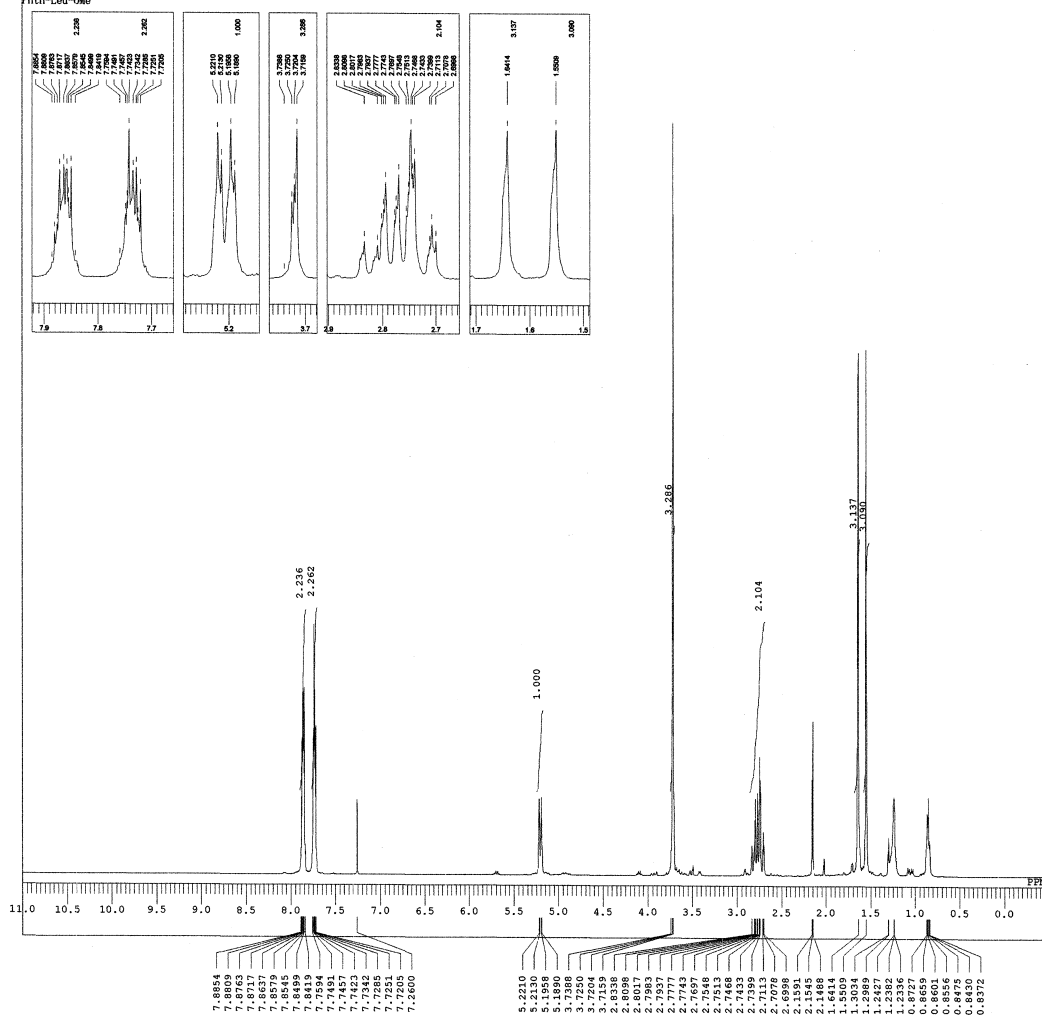

DFILE ozawa09-158\_1H.jdf  
 COMNT Phth-Leu-OMe  
 DATIM 09-09-2016 16:52:35  
 ORNUC 1H  
 EXMOD proton.jxp  
 OBFRQ 391.78 MHz  
 OBSET 8.51 KHz  
 OBTIN 3.34 Hz  
 POINT 16384  
 FREQU 7352.94 Hz  
 SCANS 4  
 ACQTM 2.2282 sec  
 PD 5.0000 sec  
 FWI 6.45 usec  
 IRNUC 1H  
 CTMP 460.0 c  
 SLVNT CDCL3  
 EXREF 7.26 ppm  
 BF 0.12 Hz  
 RGAIN 26

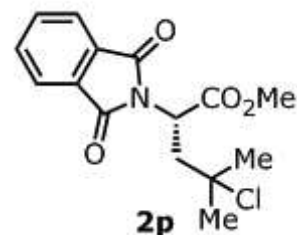

Phth-Leu-OMe

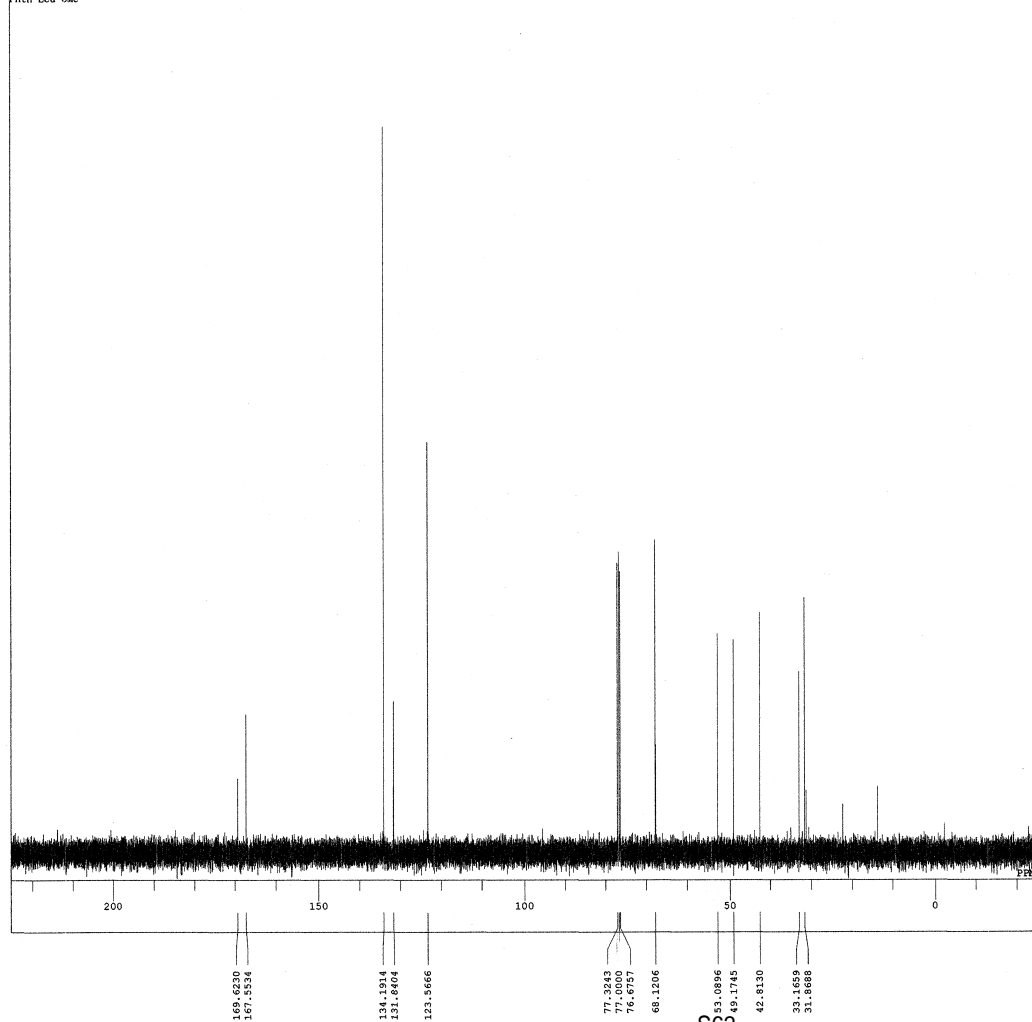

DFILE ozawa09-158\_13C.jdf  
 COMNT Phth-Leu-OMe  
 DATIM 09-09-2016 16:54:12  
 ORNUC 13C  
 EXMOD carbon.jxp  
 OBFRQ 99.52 MHz  
 OBSET 4.64 KHz  
 OBTIN 8.74 Hz  
 POINT 65535  
 FREQU 30788.18 Hz  
 SCANS 52  
 ACQTM 2.1286 sec  
 PD 2.0000 sec  
 FWI 3.73 usec  
 IRNUC 1H  
 CTMP 460.0 c  
 SLVNT CDCL3  
 EXREF 77.00 ppm  
 BF 0.12 Hz  
 RGAIN 60

2-CN-tol

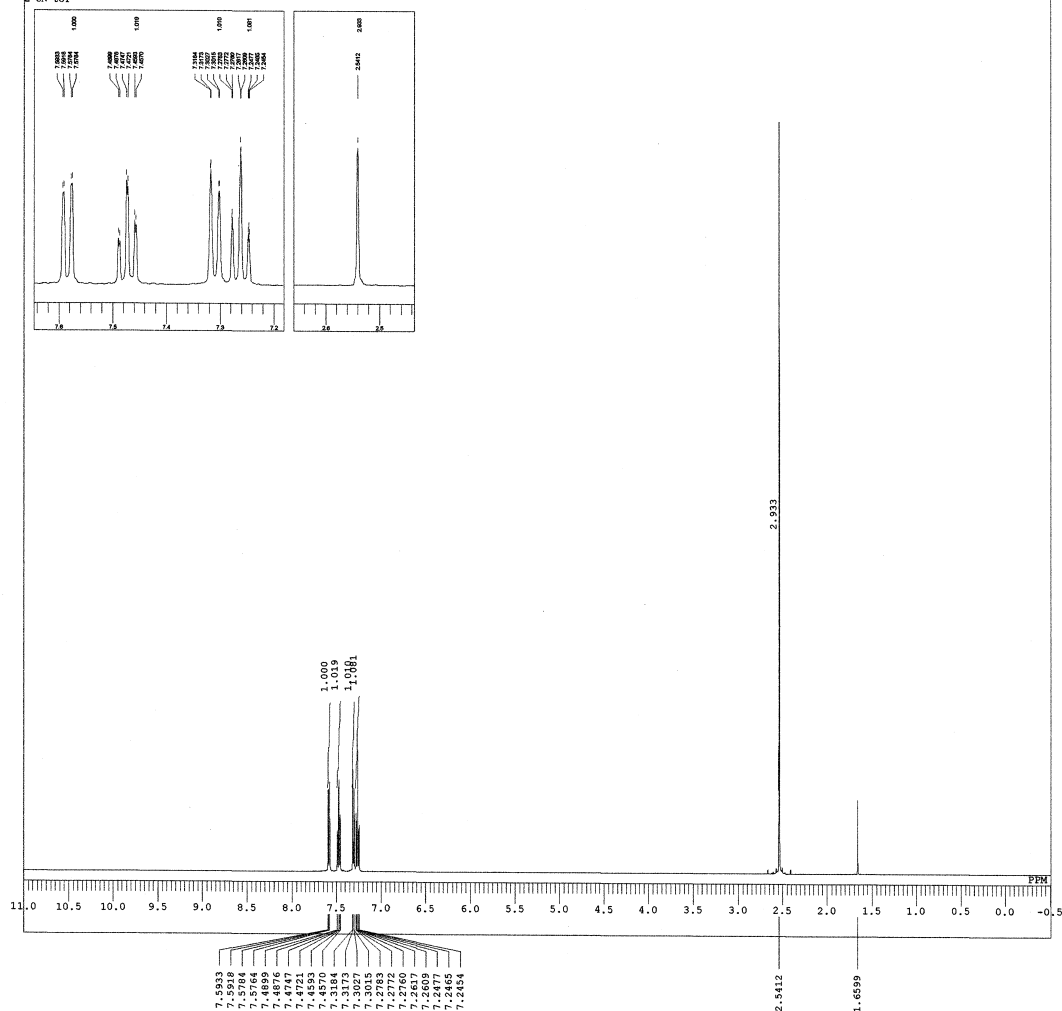

DFILE ozawa09-166\_SM\_1H.als  
 COMNT 2-CN-tol  
 DATIM 2016-09-27 14:47:35  
 CNUC 1H  
 EXMOD proton.jxp  
 OBFRQ 500.16 MHz  
 OBSET 2.41 KHz  
 OBITM 6.01 Hz  
 POINT 52428  
 FREQU 7507.51 Hz  
 SCANS 4  
 ACQTM 6.9835 sec  
 PD 5.0000 sec  
 FWL 5.55 usec  
 TRNUC 1H  
 CTMP 21.3 c  
 SLVNT CDCL3  
 EXREF 7.26 ppm  
 BF 0.12 Hz  
 RGAIN 28

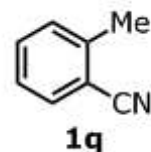

2-CN-tol

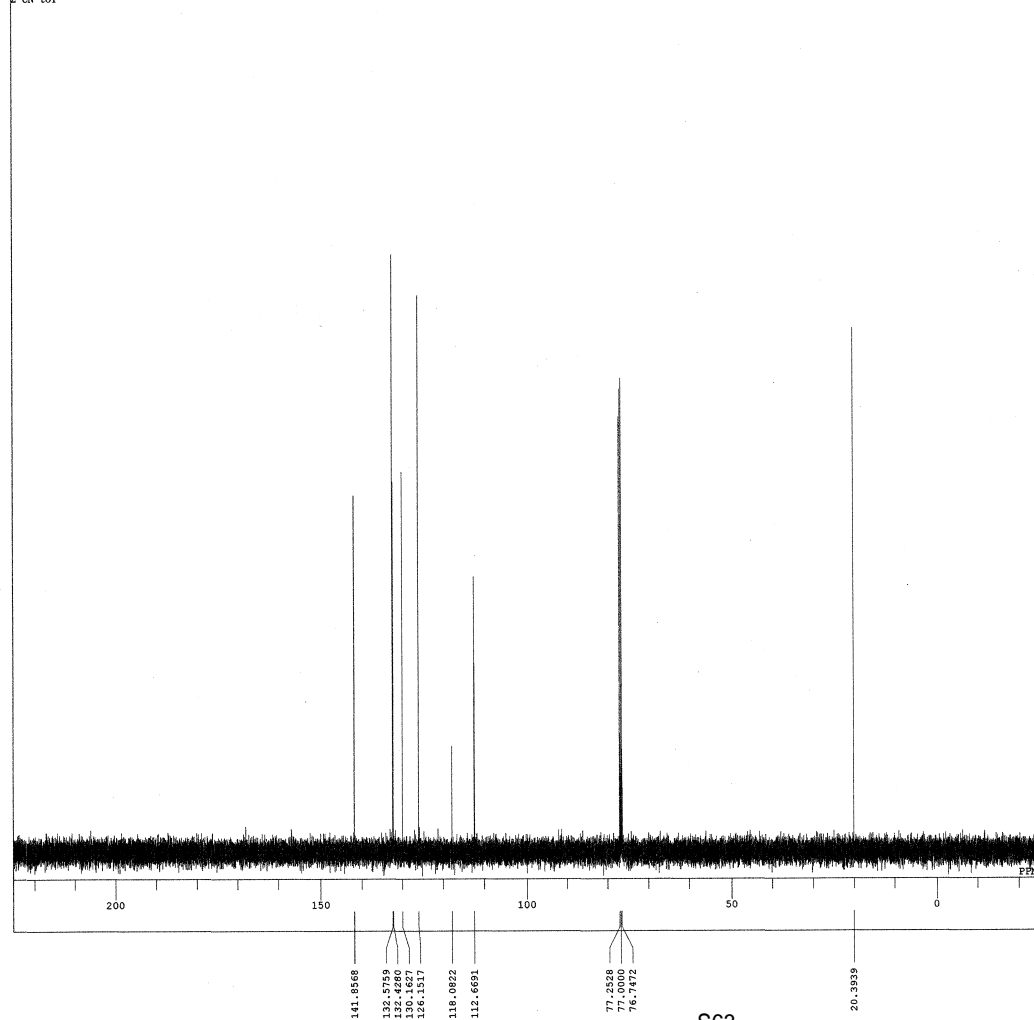

DFILE ozawa09-166\_SM\_13C.als  
 COMNT 2-CN-tol  
 DATIM 2016-09-27 14:49:03  
 CNUC 13C  
 EXMOD carbon.jxp  
 OBFRQ 125.77 MHz  
 OBSET 7.87 KHz  
 OBITM 4.21 Hz  
 POINT 52428  
 FREQU 31446.54 Hz  
 SCANS 24  
 ACQTM 1.6672 sec  
 PD 2.0000 sec  
 FWL 3.40 usec  
 TRNUC 13C  
 CTMP 21.6 c  
 SLVNT CDCL3  
 EXREF 77.00 ppm  
 BF 0.12 Hz  
 RGAIN 60

2-CN-tol

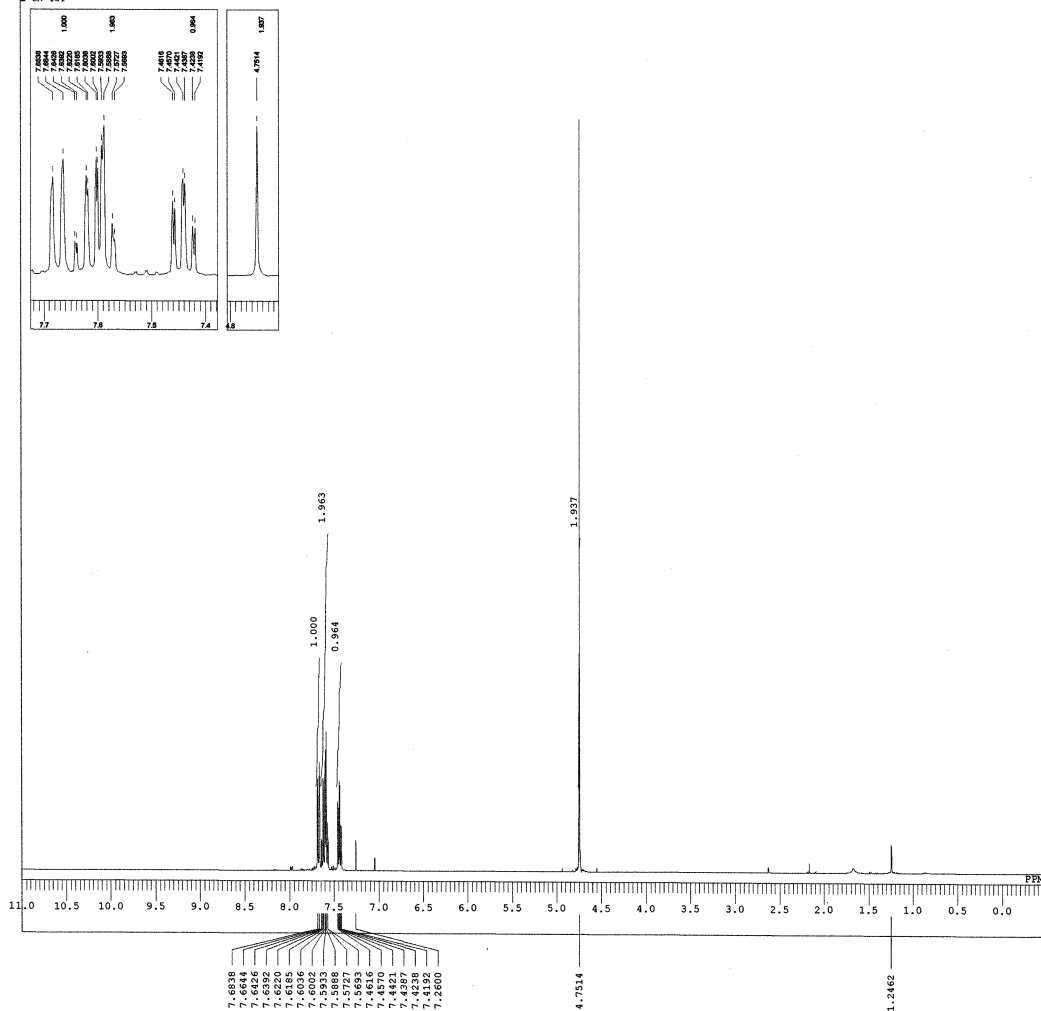

DFILE ozawa09-166\_1H.jdf  
 COMNT 2-CN-tol  
 DATIM 14-09-2016 14:19:53  
 ORNUC 1H  
 EXMOD proton.jxp  
 OBFRQ 391.78 MHz  
 OBSET 8.51 KHz  
 OBTIN 3.34 Hz  
 POINT 16384  
 FREQU 7352.94 Hz  
 SCANS 4  
 ACQTM 2.2282 sec  
 PD 5.0000 sec  
 FW1 6.45 usec  
 IRNUC 1H  
 CTEMP 460.0 c  
 SLVNT CDCL3  
 EXREF 7.26 ppm  
 BF 0.12 Hz  
 RGAIN 28

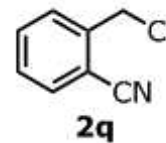

2-CN-tol

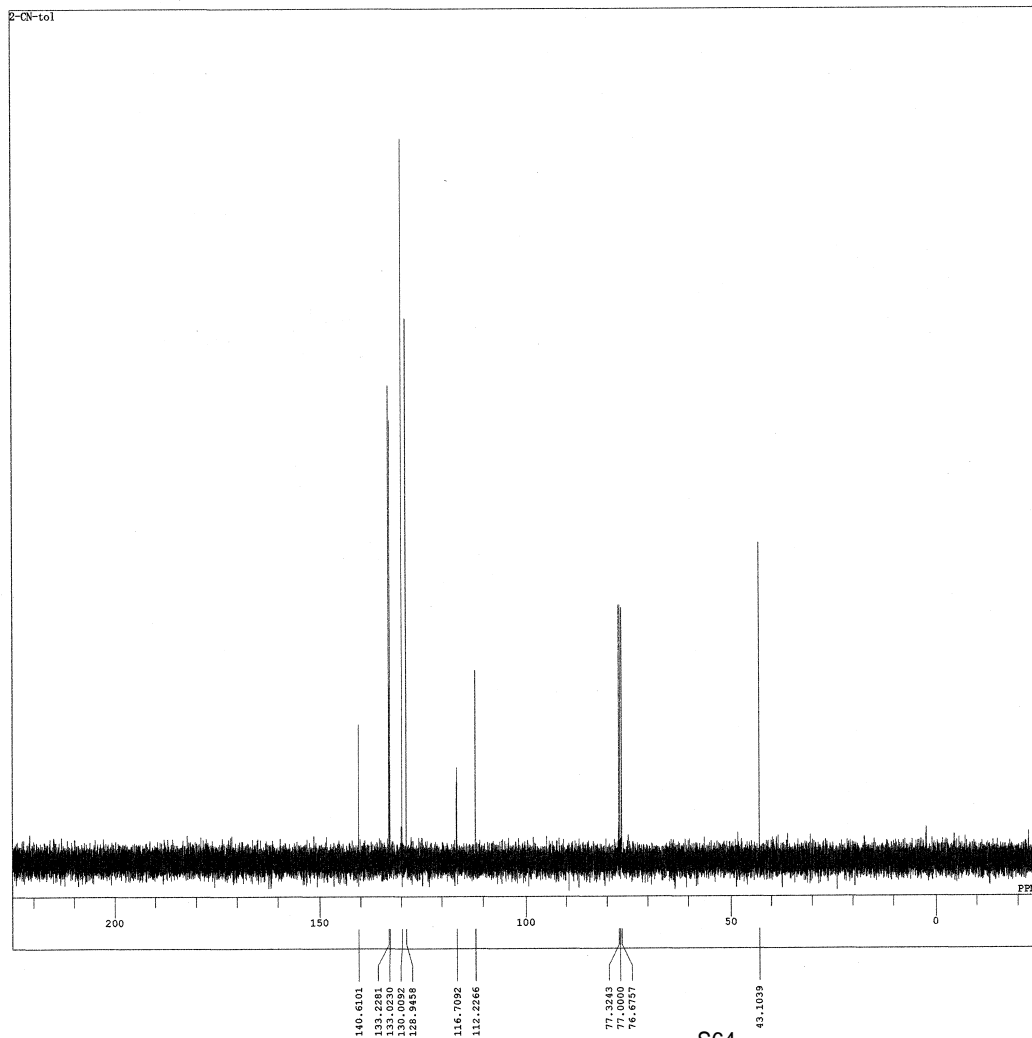

DFILE ozawa09-166\_13C.jdf  
 COMNT 2-CN-tol  
 DATIM 14-09-2016 14:21:22  
 ORNUC 13C  
 EXMOD carbon.jxp  
 OBFRQ 99.52 MHz  
 OBSET 4.64 KHz  
 OBTIN 8.74 Hz  
 POINT 65535  
 FREQU 30788.18 Hz  
 SCANS 16  
 ACQTM 2.1286 sec  
 PD 2.0000 sec  
 FW1 3.73 usec  
 IRNUC 1H  
 CTEMP 460.0 c  
 SLVNT CDCL3  
 EXREF 77.00 ppm  
 BF 0.12 Hz  
 RGAIN 60

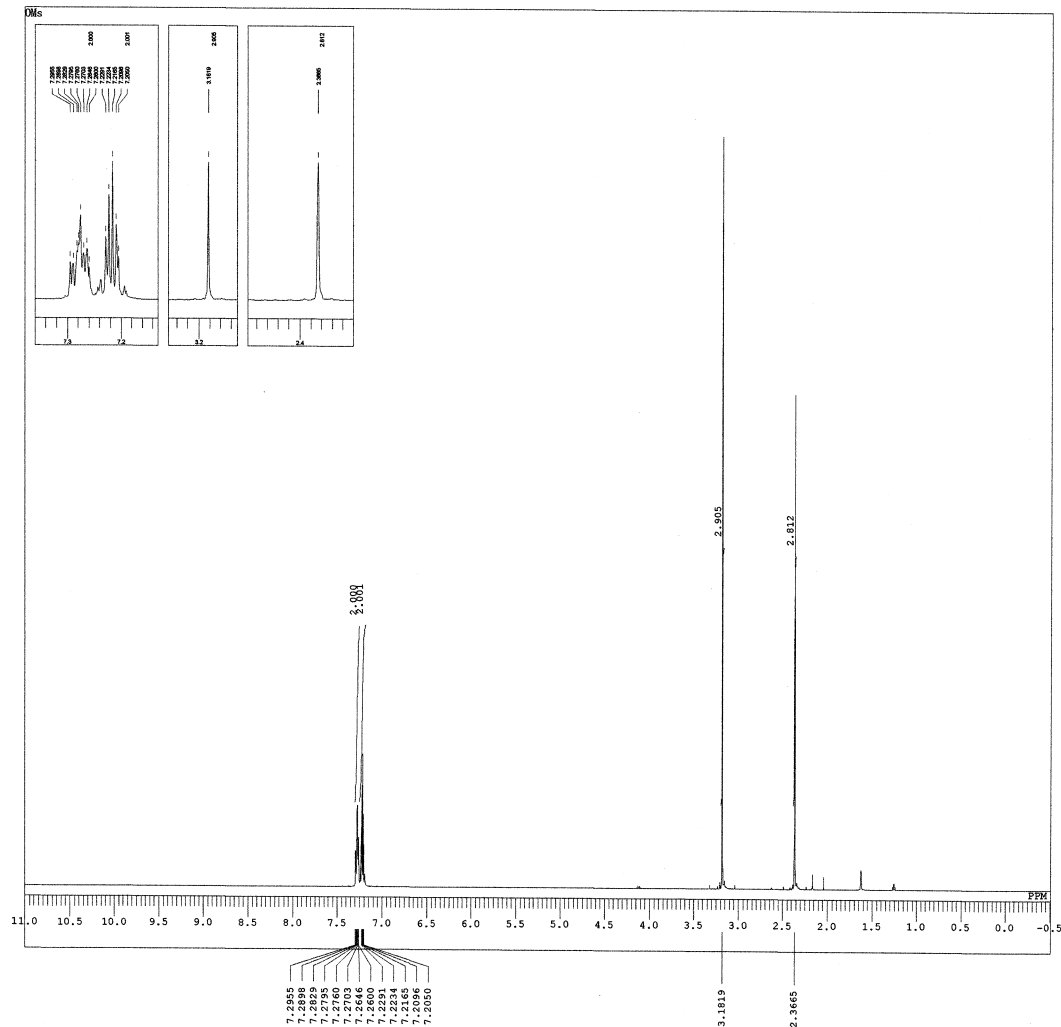

DFILE oza09-185\_1H.als  
 COMNT OMs  
 DATIM 2016-09-27 10:30:60  
 OBNUC 1H  
 EXMOD proton.jpg  
 OBFRQ 500.16 MHz  
 OBSET 2.41 KHz  
 OBFIN 6.01 Hz  
 POINT 13107  
 FREQU 7507.51 Hz  
 SCANS 4  
 ACQTM 1.7459 sec  
 PD 5.0000 sec  
 FW1 5.55 usec  
 IRNUC 1H  
 CTMP 21.2 c  
 SLVNT CDCL3  
 EXREF 7.26 ppm  
 SF 0.12 Hz  
 RGAIN 28

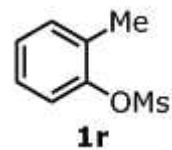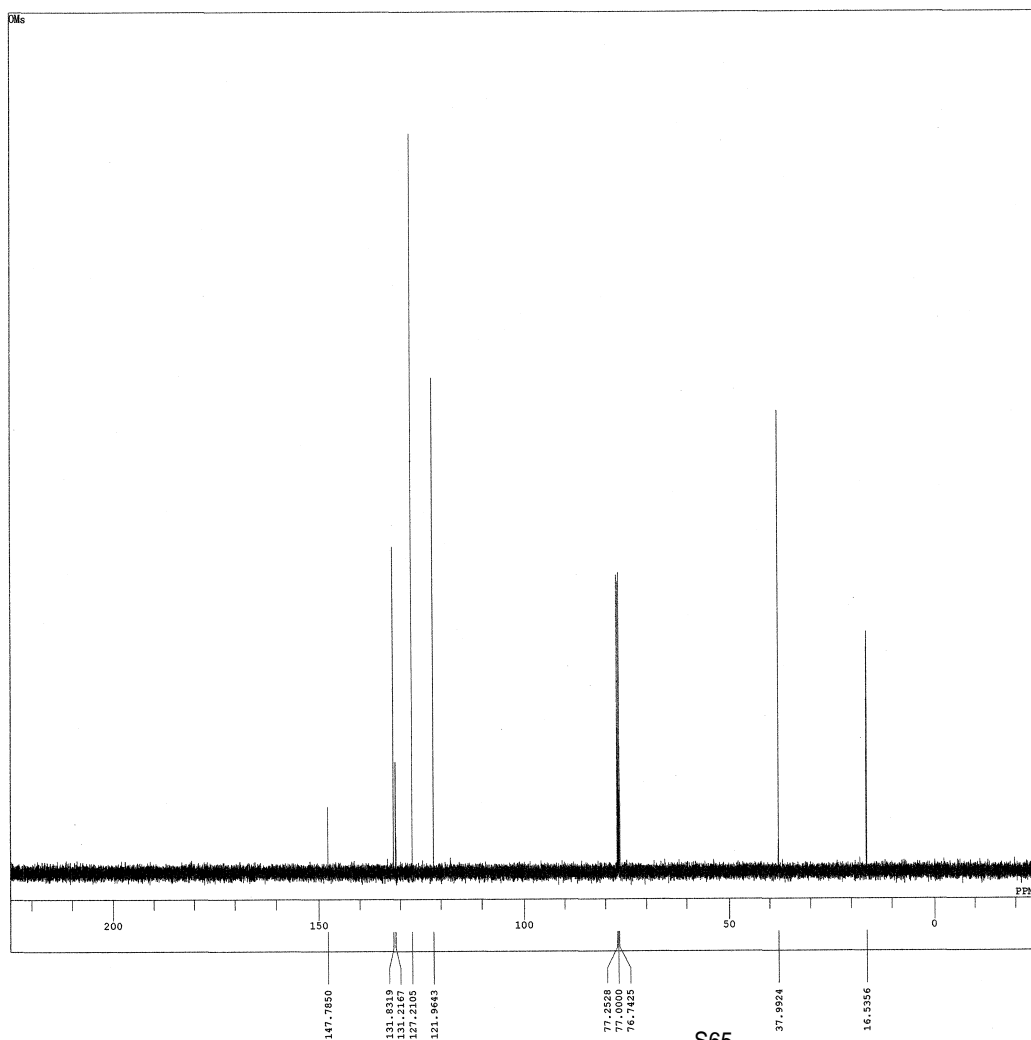

DFILE oza09-185\_13C.als  
 COMNT OMs  
 DATIM 2016-09-27 10:31:59  
 OBNUC 13C  
 EXMOD carbon.jpg  
 OBFRQ 125.77 MHz  
 OBSET 7.87 KHz  
 OBFIN 4.21 Hz  
 POINT 52428  
 FREQU 31446.54 Hz  
 SCANS 44  
 ACQTM 1.6672 sec  
 PD 2.0000 sec  
 FW1 3.40 usec  
 IRNUC 1H  
 CTMP 21.5 c  
 SLVNT CDCL3  
 EXREF 77.00 ppm  
 SF 0.12 Hz  
 RGAIN 60

2-OMs-tol

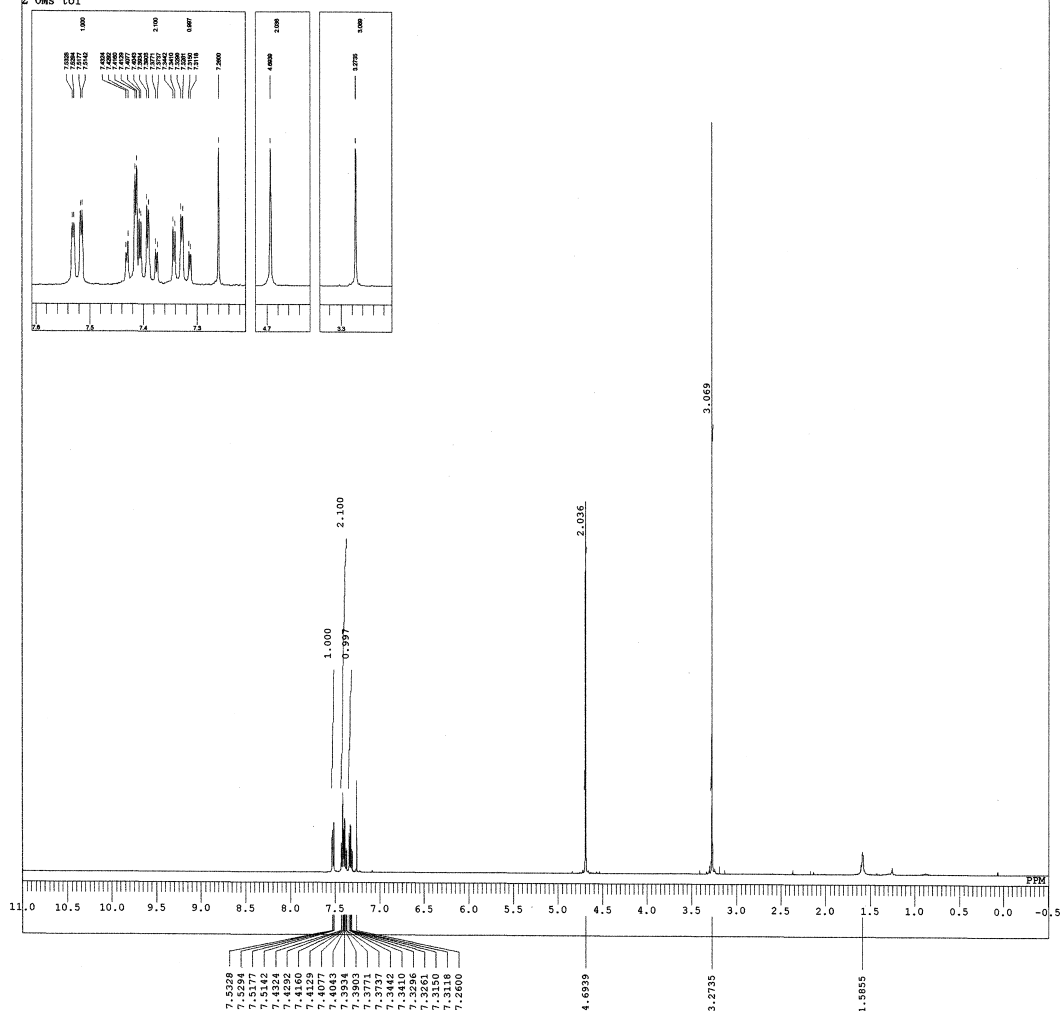

DFILE ozawa09-192\_1H.als  
COMNT 2-OMs-tol  
DATIM 2016-09-28 13:41:24  
CHNUC 1H  
EXMOD proton.jpg  
OBFRQ 500.16 MHz  
OBSET 2.41 kHz  
OBFIN 6.01 Hz  
POINT 52428  
FREQU 7507.51 Hz  
SCANS 4  
AQTM 6.9835 sec  
PD 5.0000 sec  
PWI 5.55 usec  
IRNUC 1H  
CTEMP 21.5 c  
SLVNT CDCL3  
EXREF 7.26 ppm  
BF 0.12 Hz  
RGAIN 30

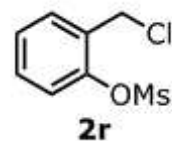

2-OMs-tol

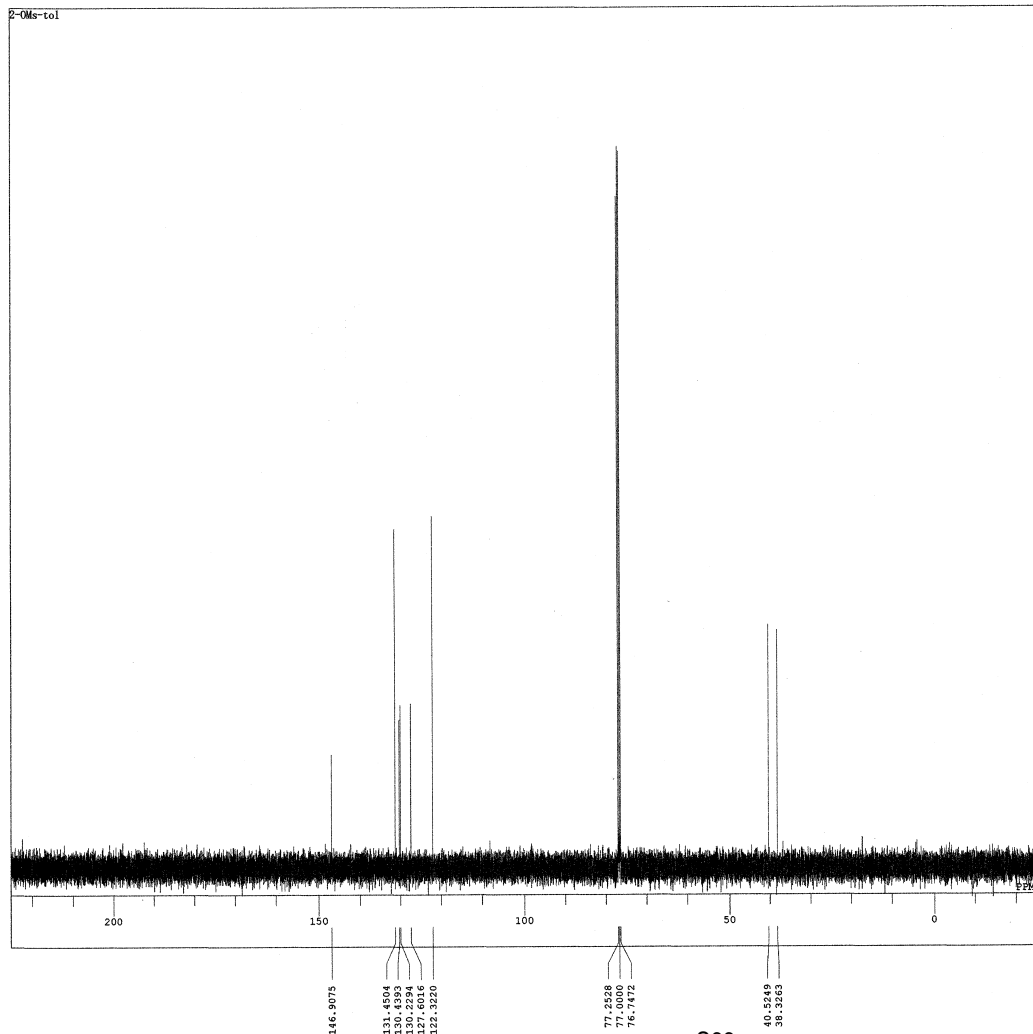

DFILE ozawa09-192\_13C.als  
COMNT 2-OMs-tol  
DATIM 2016-09-28 13:42:48  
CHNUC 13C  
EXMOD carbon.jpg  
OBFRQ 125.77 MHz  
OBSET 7.97 kHz  
OBFIN 4.21 Hz  
POINT 52428  
FREQU 31446.54 Hz  
SCANS 56  
AQTM 1.6672 sec  
PD 2.0000 sec  
PWI 3.40 usec  
IRNUC 1H  
CTEMP 21.6 c  
SLVNT CDCL3  
EXREF 77.00 ppm  
BF 0.12 Hz  
RGAIN 60

  
**1s**

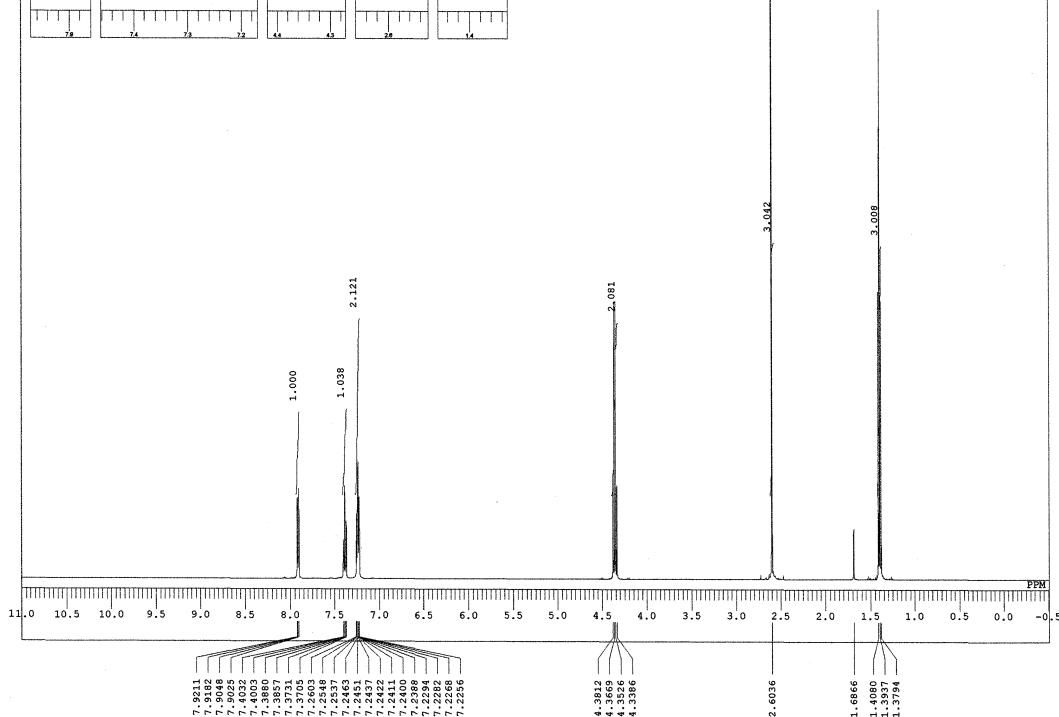

<sup>13</sup>C NMR spectrum of compound 10. The x-axis represents the chemical shift in ppm, ranging from 0 to 250. The spectrum shows several sharp peaks, with the most prominent ones at 167.6727, 135.9346, 131.7556, 130.4250, 129.8956, 125.6980, 77.2528, 77.0000, 76.7433, 60.6368, 21.6578, and 14.2798 ppm. The peak at 77.0000 ppm is the solvent peak for CDCl<sub>3</sub>.

```

DFILE      ozaaw09-196_SM_13C.als
CDEMT      2-CO2Et-tol
DATIM      2016-09-27 14:43:00
EXPNO      13C
PROCNO      carbon.jsp
OBPFRQ      125.77 MHz
ORBSZ      7.87 KHz
OBFIN      4.21 Hz
POINT      52428
FREQU      31446.54 Hz
SCAMS      16
ACOTM      1.6672 sec
PD          2.0000 sec
PWL         3.40 usec
IRNUC      1H
CTEMP      21.4 c
SLVNT      CDCL3
EXREF      77.00 ppm
BF          0.12 Hz
RGAIN      60

```

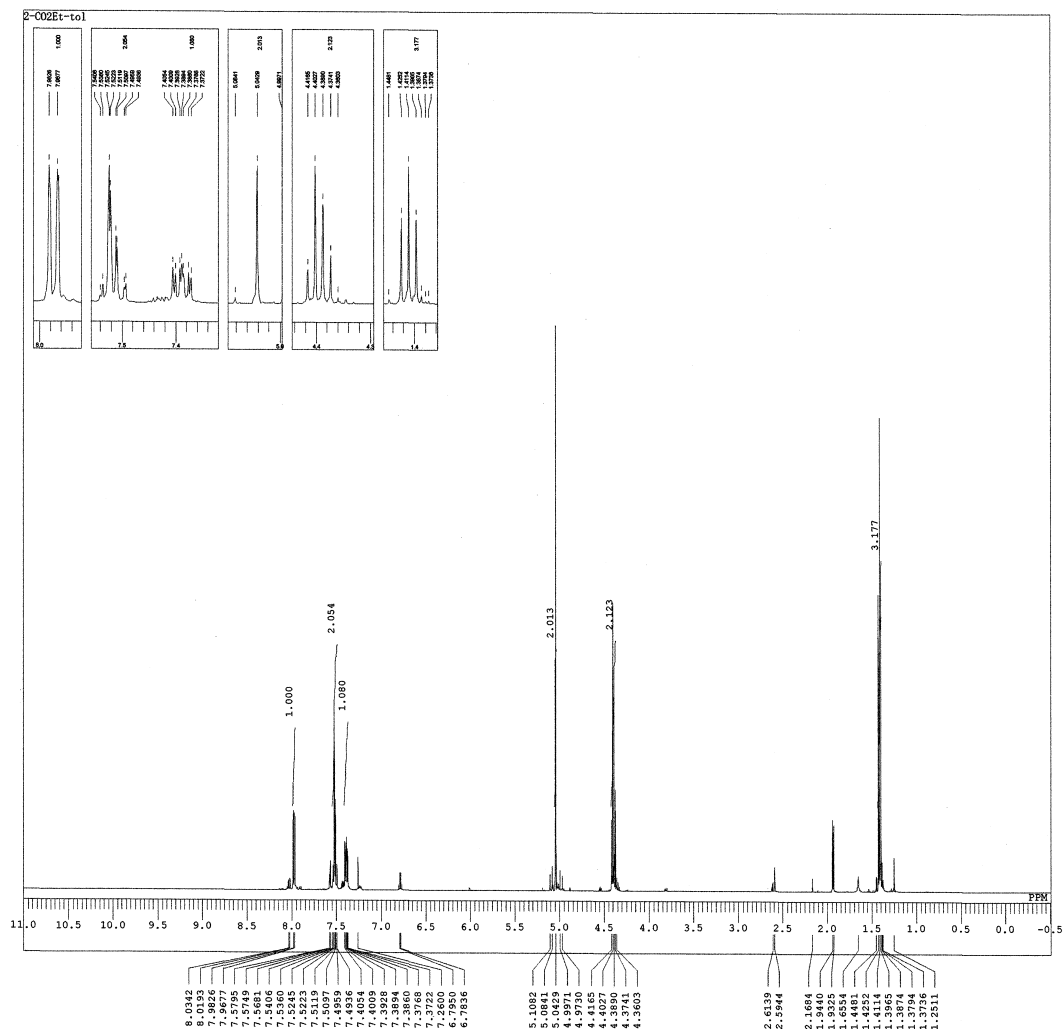

DFILE ozawa09-196 1H.als  
 COMNT 2-CO2Et-tol  
 DATIM 2016-09-27 10:25:17  
 CHNUC 1H  
 EXMOD proton.jpg  
 OFFRQ 500.16 MHz  
 OBSST 2.41 KHz  
 OFBIN 6.01 Hz  
 POINT 13107  
 FREQU 7507.51 Hz  
 SCANS 4  
 ACQTM 1.7459 sec  
 PD 5.0000 sec  
 FWI 5.55 usec  
 IRNUC 1H  
 CTEMP 21.0 c  
 SLVNT CDCL3  
 EXREF 7.26 ppm  
 BF 0.12 Hz  
 RGAIN 26

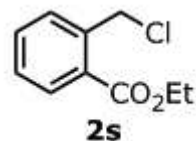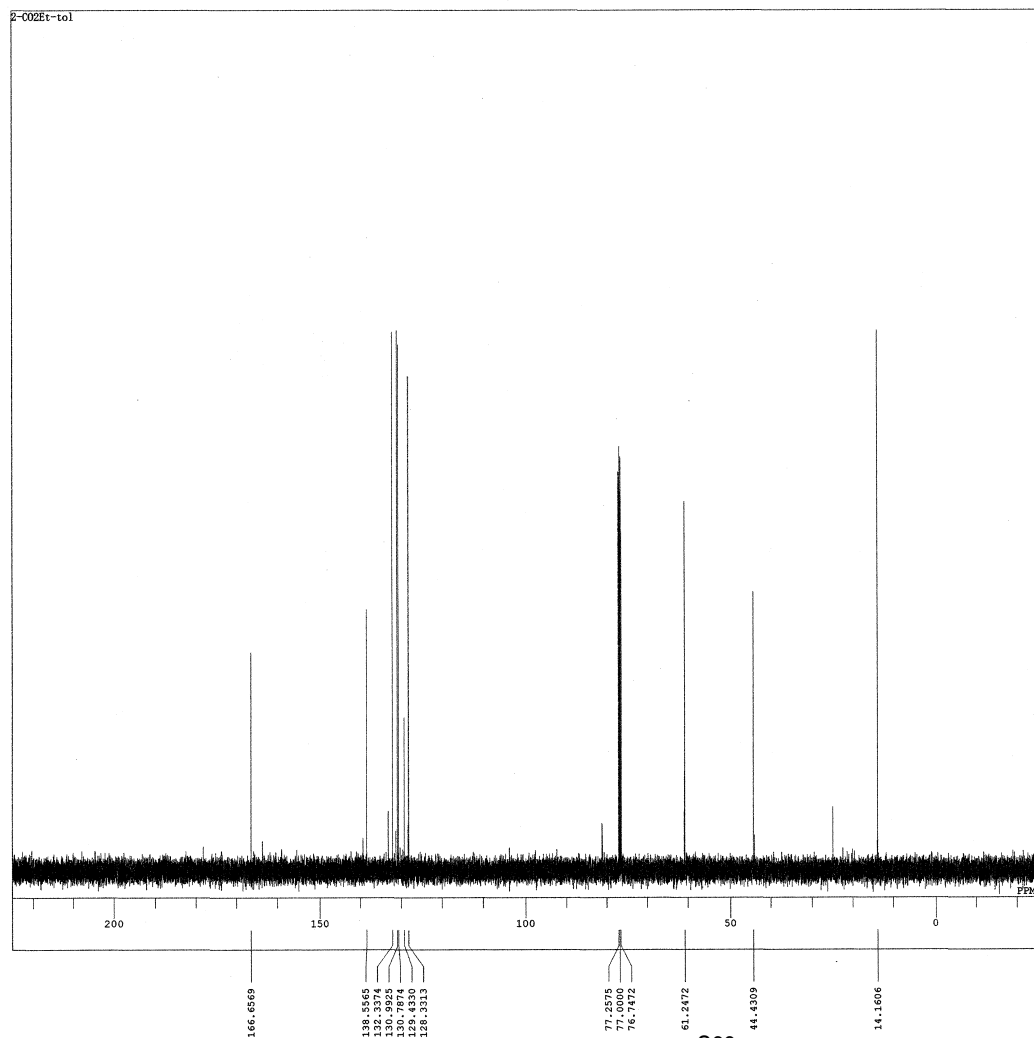

DFILE ozawa09-196 13C.als  
 COMNT 2-CO2Et-tol  
 DATIM 2016-09-27 10:26:18  
 CHNUC 13C  
 EXMOD carbon.jpg  
 OFFRQ 125.77 MHz  
 OBSST 7.87 KHz  
 OFBIN 4.21 Hz  
 POINT 52428  
 FREQU 31446.54 Hz  
 SCANS 24  
 ACQTM 1.6672 sec  
 PD 2.0000 sec  
 FWI 3.40 usec  
 IRNUC 1H  
 CTEMP 21.3 c  
 SLVNT CDCL3  
 EXREF 77.00 ppm  
 BF 0.12 Hz  
 RGAIN 60



3-CO2Me-tol

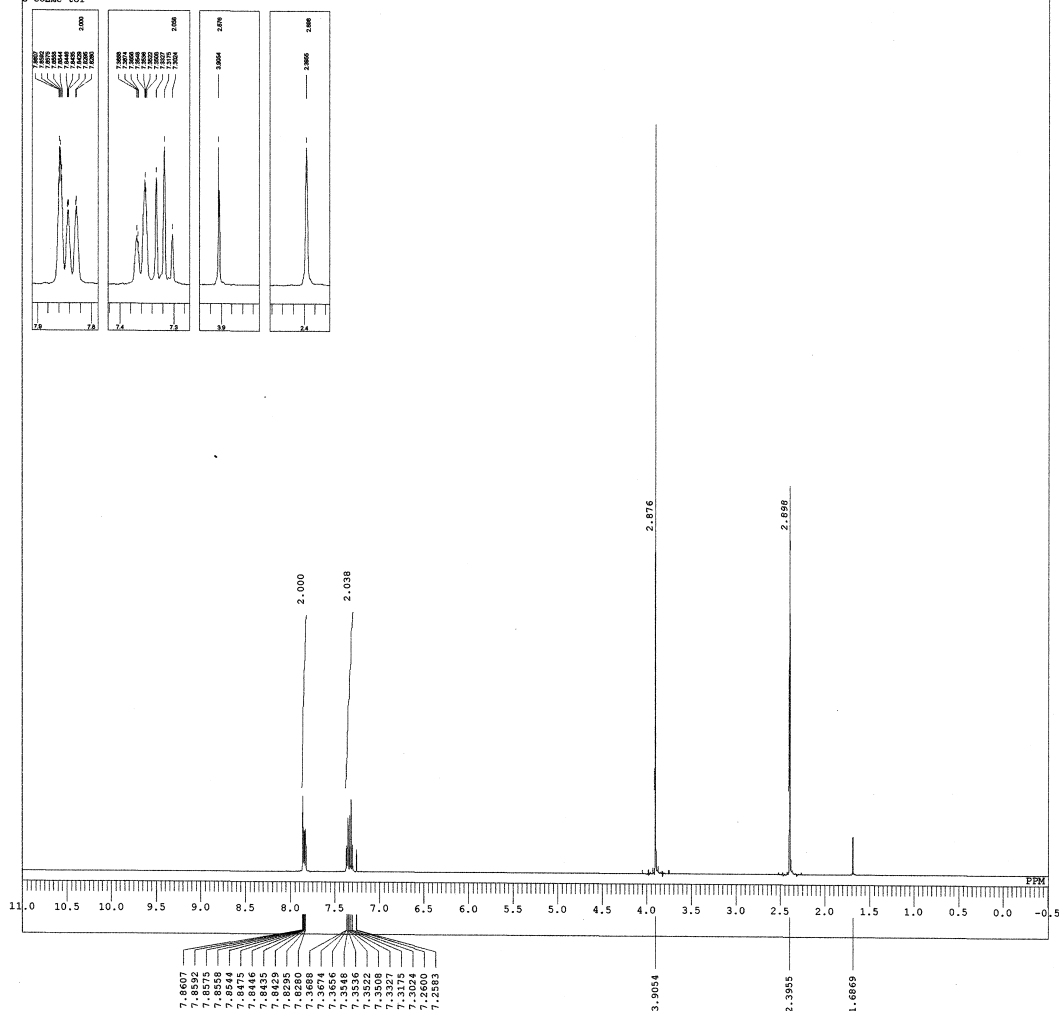

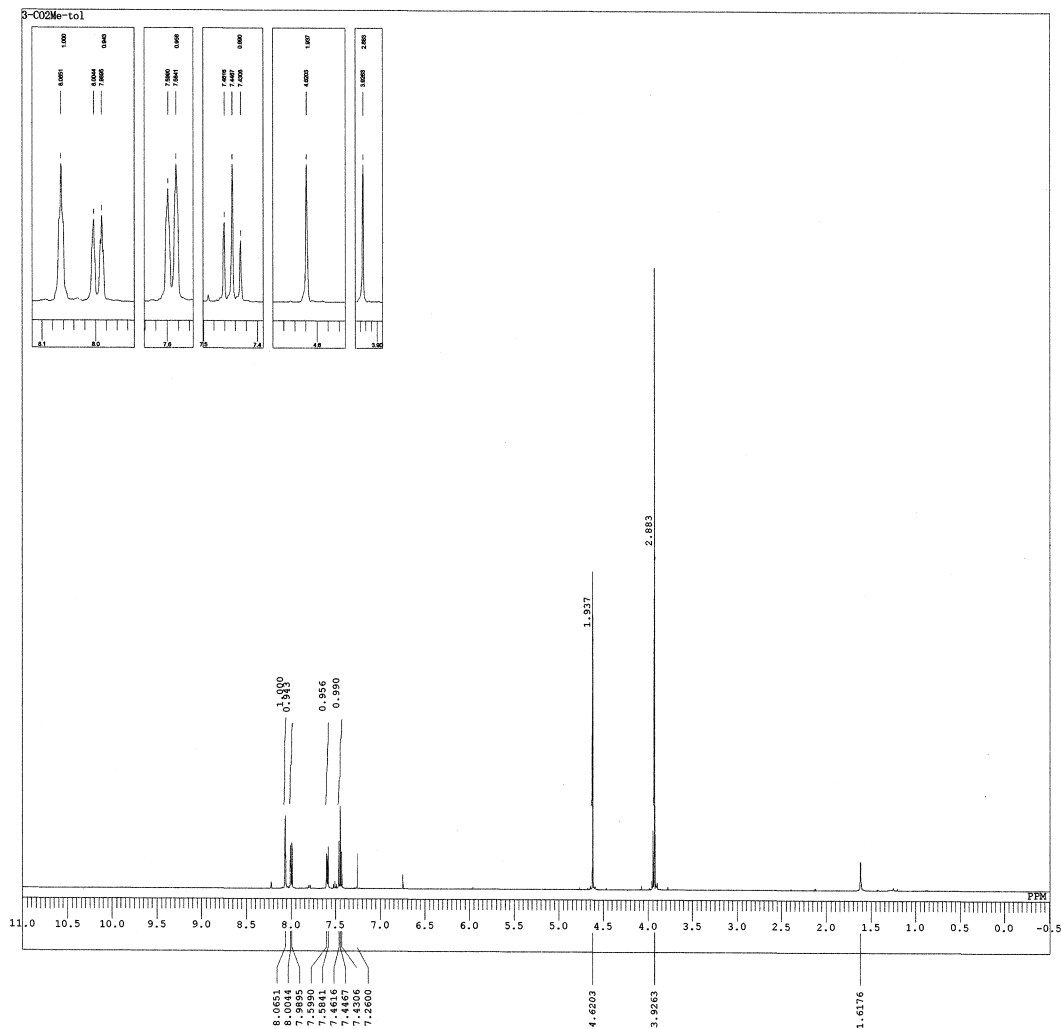

DFILE ozawa10-003\_1H.als  
 COMMT 3-CO2Me-tol  
 DATIM 2016-09-30 17:29:22  
 OBNUC 1H  
 EXMOD proton.jpg  
 OBFRQ 500.16 MHz  
 OBSST 2.41 KHz  
 OBFIN 6.01 Hz  
 POINT 13107  
 FREQU 7507.51 Hz  
 SCANS 4  
 ACQTM 1.7459 sec  
 PD 5.0000 sec  
 FWI 5.55 usec  
 IRNUC 1H  
 CTMP 21.2 c  
 SLVNT CDCL3  
 EXREF 7.26 ppm  
 BF 0.12 Hz  
 RGAIN 30

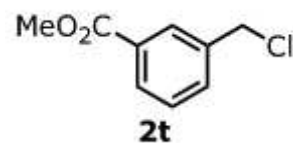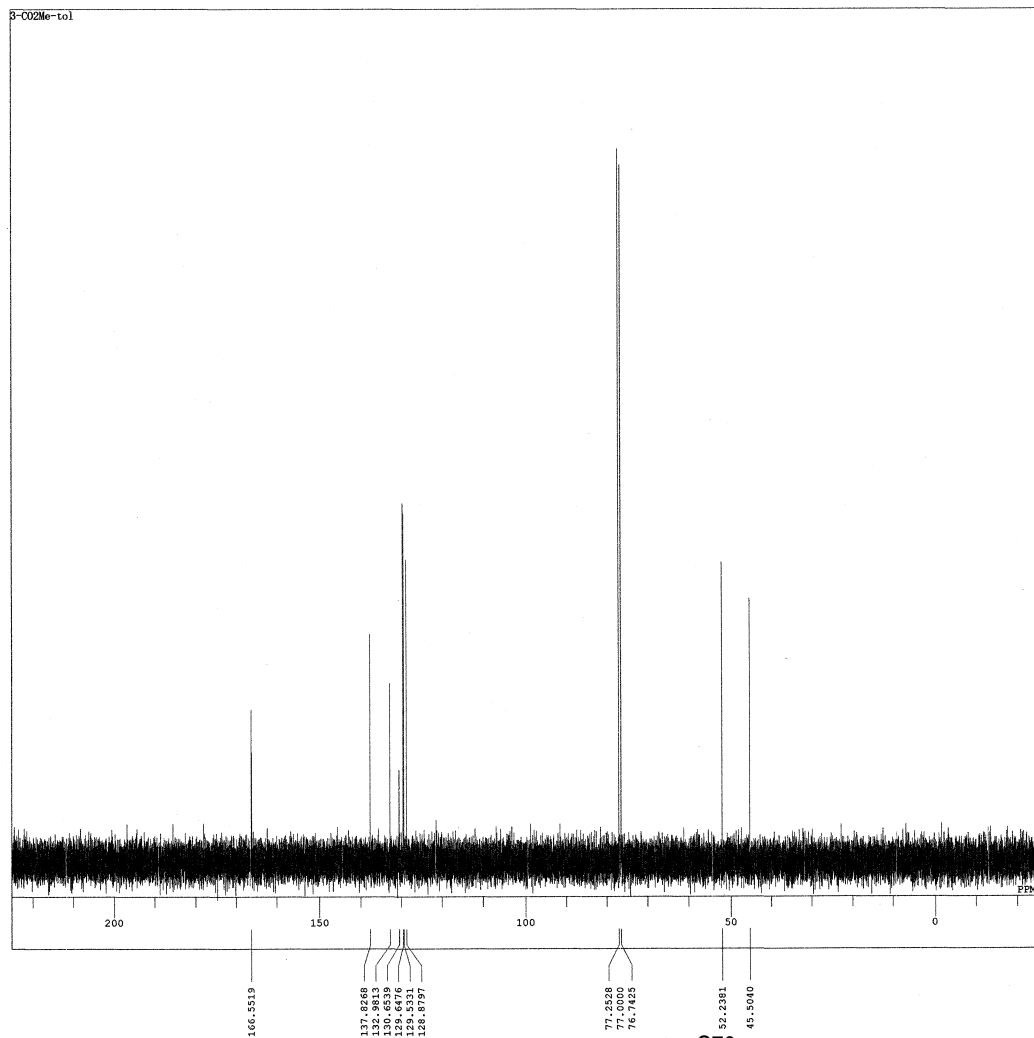

DFILE ozawa10-003\_13C.als  
 COMMT 3-CO2Me-tol  
 DATIM 2016-09-30 17:30:17  
 OBNUC 13C  
 EXMOD carbon.jpg  
 OBFRQ 125.77 MHz  
 OBSST 7.87 KHz  
 OBFIN 4.21 Hz  
 POINT 52428  
 FREQU 31446.54 Hz  
 SCANS 20  
 ACQTM 1.6672 sec  
 PD 2.0000 sec  
 FWI 3.40 usec  
 IRNUC 13C  
 CTMP 21.3 c  
 SLVNT CDCL3  
 EXREF 77.00 ppm  
 BF 0.12 Hz  
 RGAIN 60

4-CO2tBu-tol

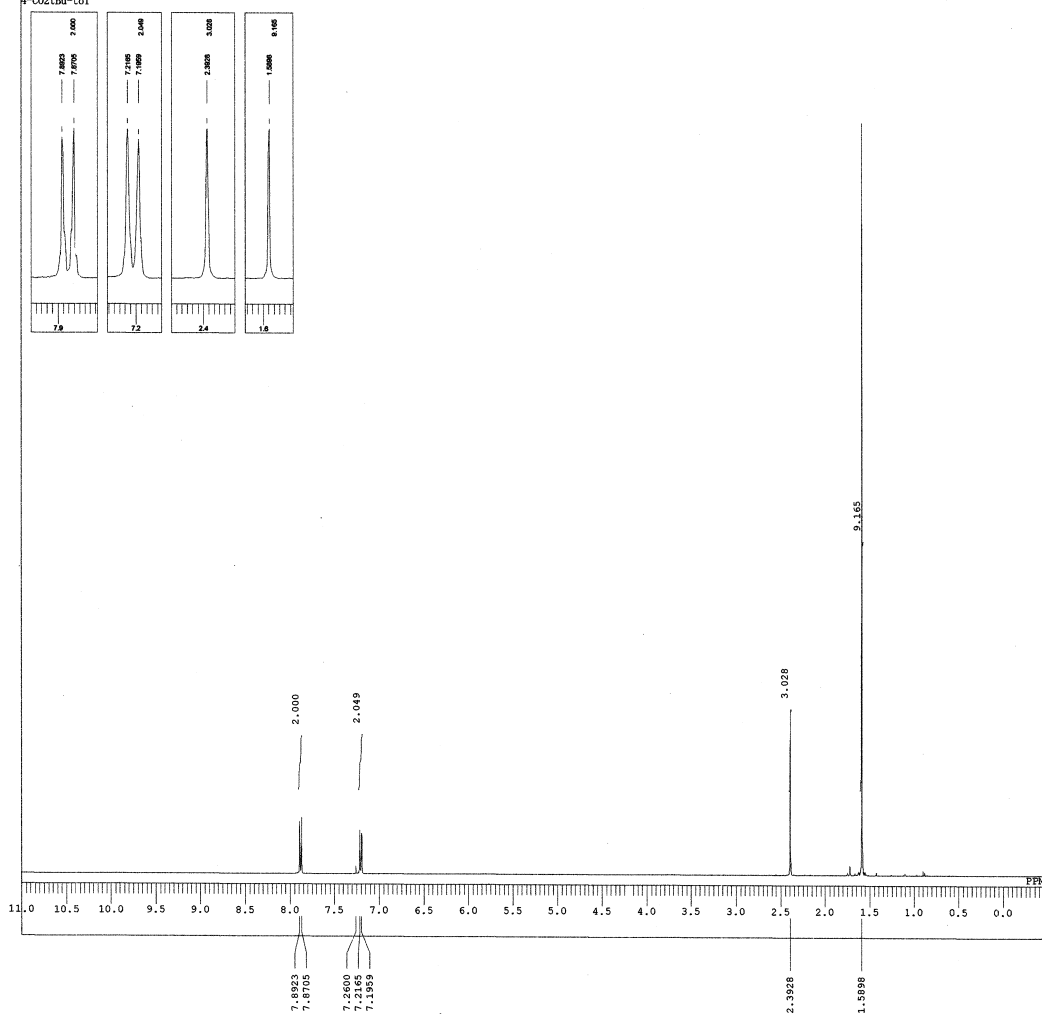

DFILE ozawa10-002\_1H.jdf  
 COMNT 4-CO2tBu-tol  
 DATIM 30-09-2016 10:21:24  
 CNUC 1H  
 EXMOD proton.jxp  
 OBFRQ 391.78 MHz  
 OBSET 8.51 KHz  
 OBTIN 3.34 Hz  
 POINT 16384  
 FREQU 7352.94 Hz  
 SCANS 4  
 ACQTM 2.2282 sec  
 PD 5.0000 sec  
 FWI 6.45 usec  
 TRNUC 1H  
 CTEMP 460.0 c  
 SLVNT CDCL3  
 EXREF 7.26 ppm  
 BF 0.12 Hz  
 RGAIN 24

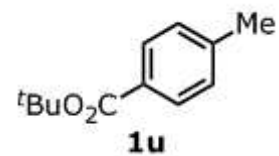

4-CO2tBu-tol

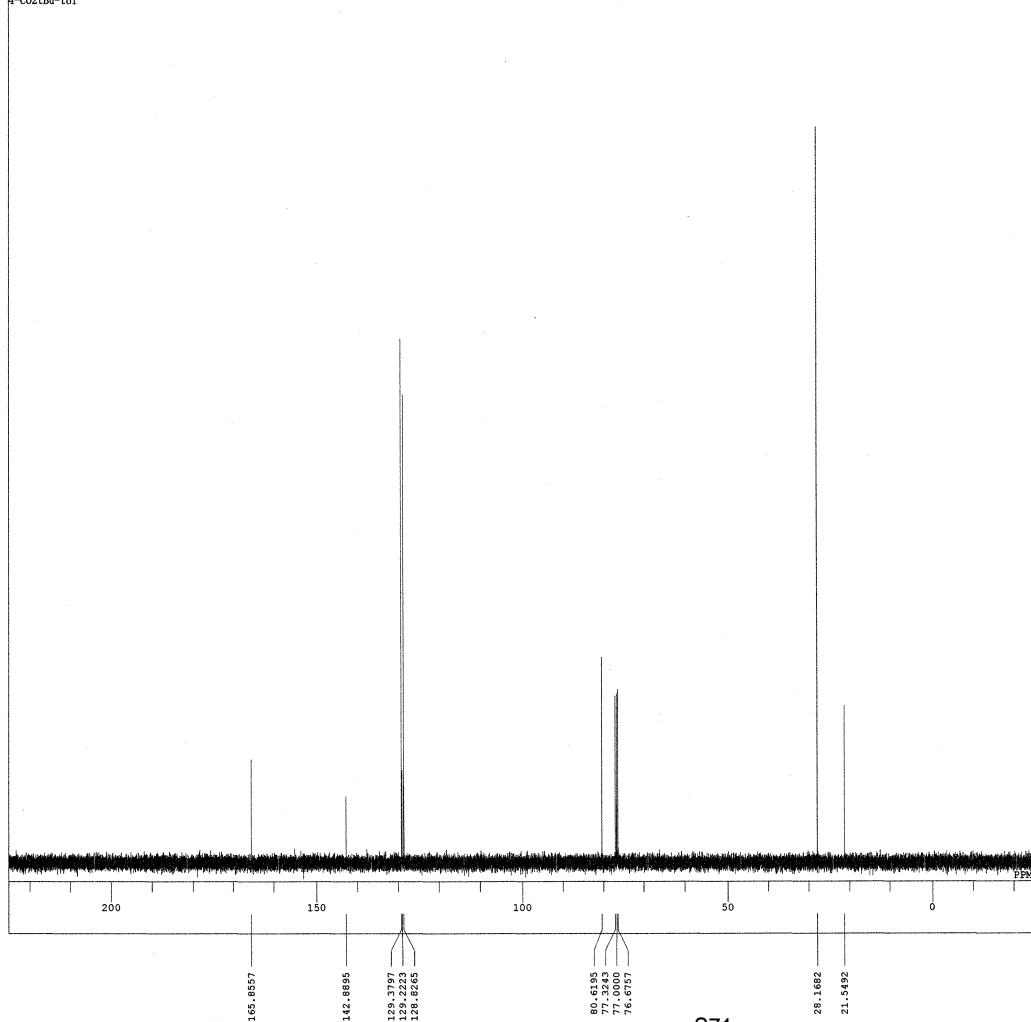

DFILE ozawa10-002\_13C-1-1.jdf  
 COMNT 4-CO2tBu-tol  
 DATIM 30-09-2016 10:22:24  
 CNUC 13C  
 EXMOD carbon.jxp  
 OBFRQ 99.52 MHz  
 OBSET 4.64 KHz  
 OBTIN 8.74 Hz  
 POINT 65535  
 FREQU 30786.18 Hz  
 SCANS 12  
 ACQTM 2.1286 sec  
 PD 2.0000 sec  
 FWI 3.73 usec  
 TRNUC 13C  
 CTEMP 460.0 c  
 SLVNT CDCL3  
 EXREF 77.00 ppm  
 BF 0.12 Hz  
 RGAIN 60

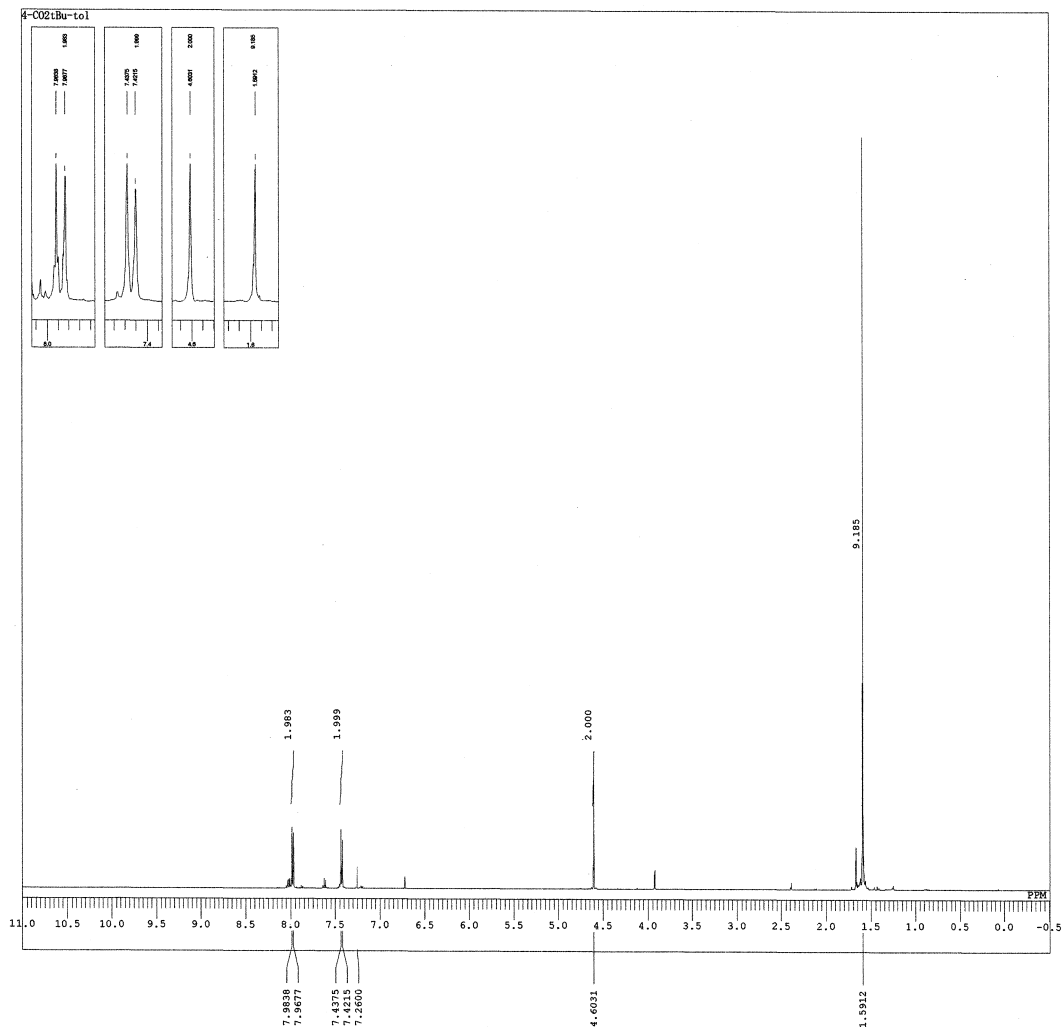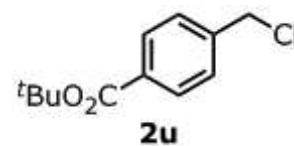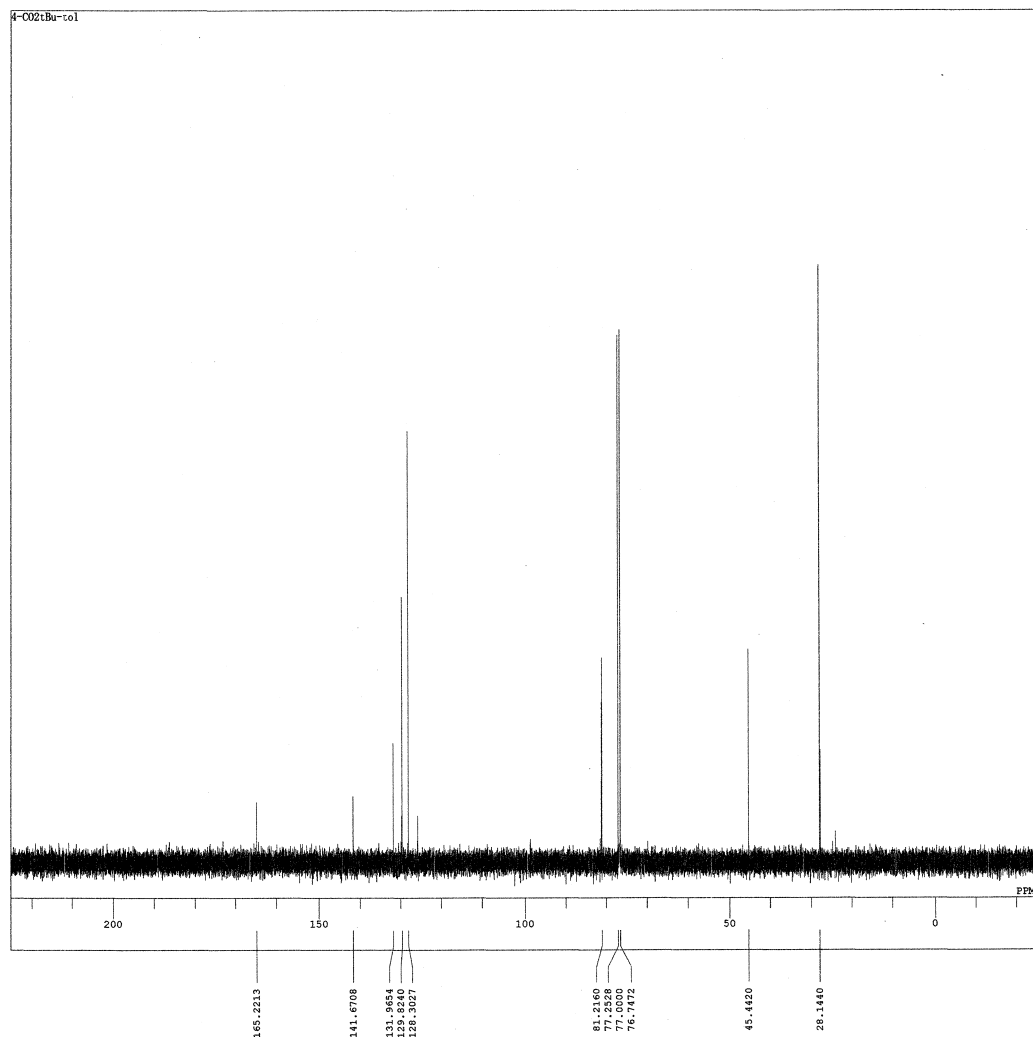

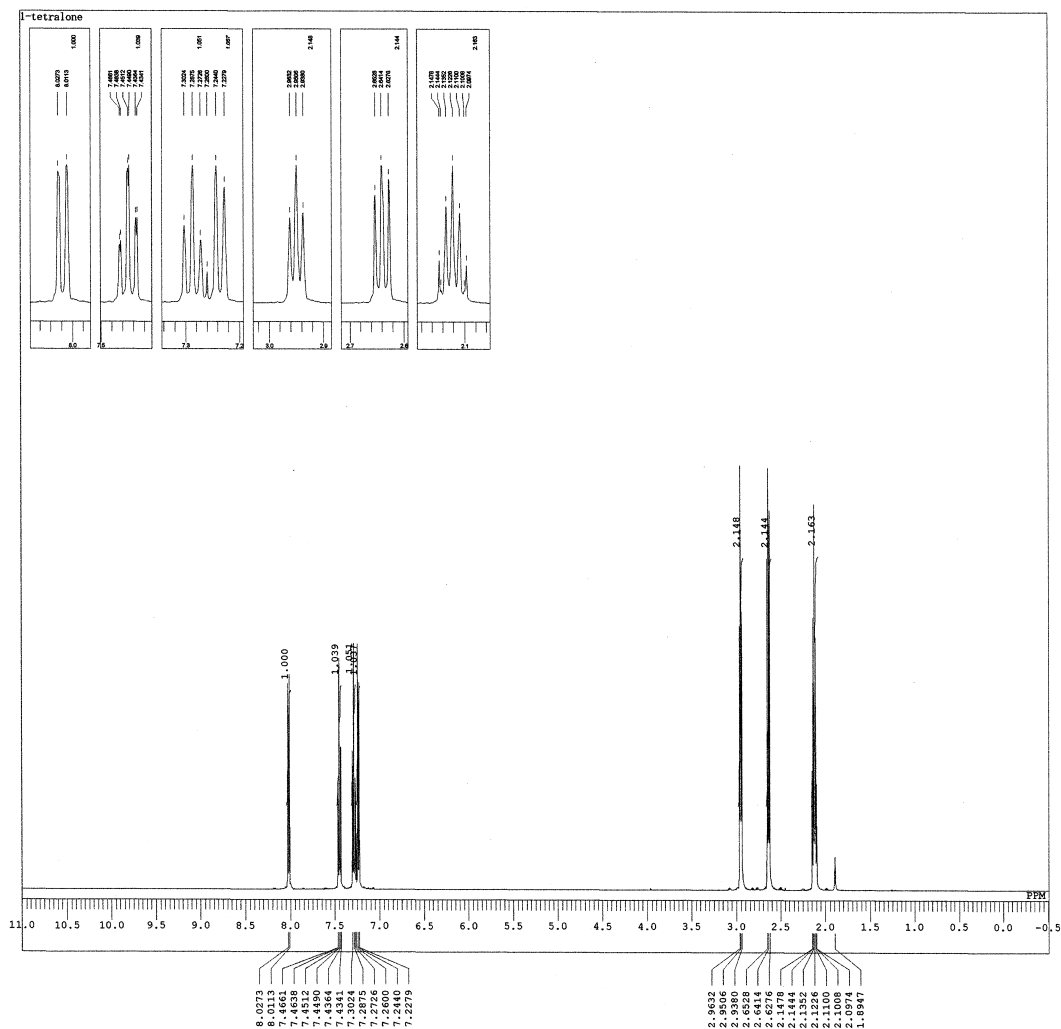

DFILE ozawa09-180\_SM\_1H.als  
 COMNT 1-tetralone  
 DATIM 2016-09-21 15:53:09  
 OBNUC 1H  
 EXMOD proton.jxp  
 OBFREQ 500.16 MHz  
 OBSFET 2.41 KHz  
 OBFIN 6.01 Hz  
 POINT 13107  
 FREQC 7507.51 Hz  
 SCANS 4  
 ACQTM 1.7459 sec  
 PD 5.0000 sec  
 FWI 5.55 usec  
 IRNUC 1H  
 CTMP 21.5 c  
 SLVNT CDCL3  
 EXREF 7.26 ppm  
 BF 0.12 Hz  
 RGAIN 26

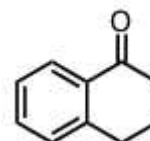

**1v**

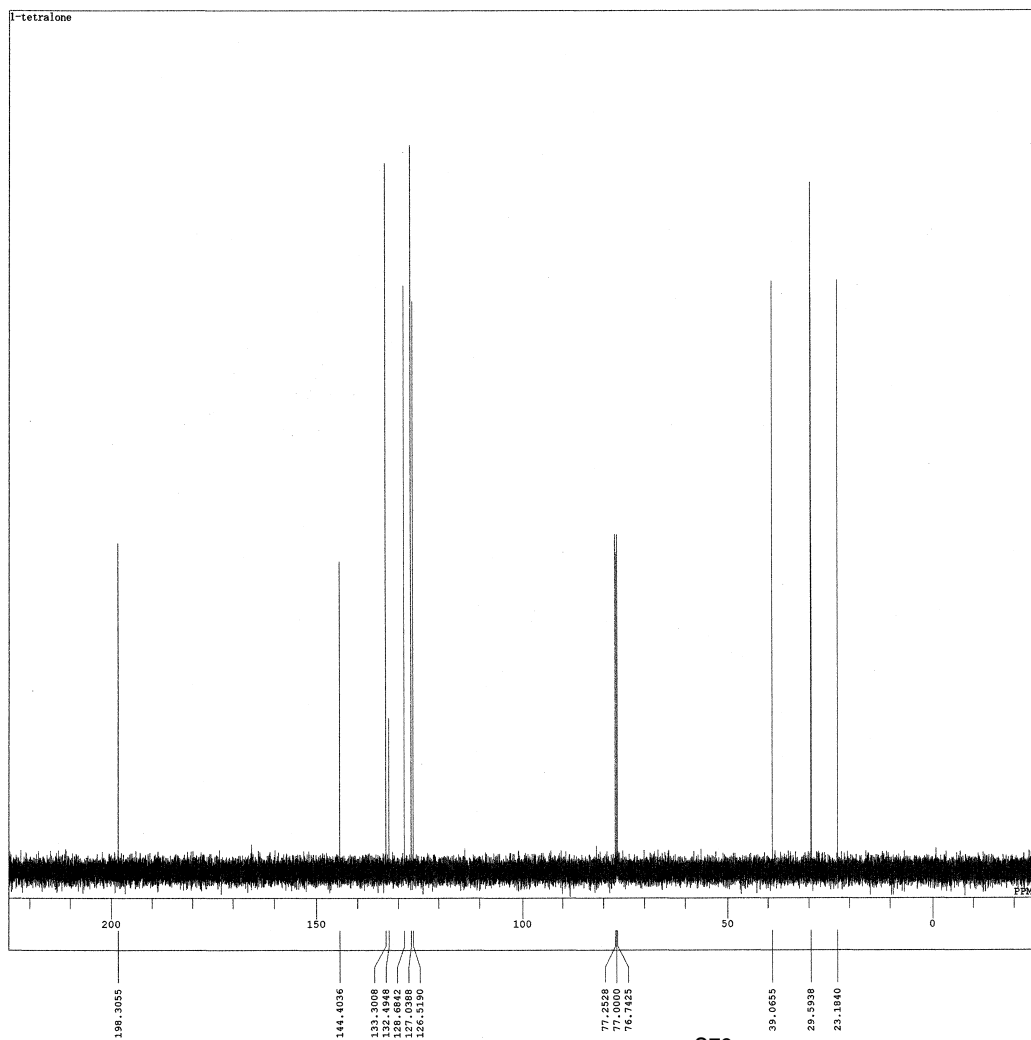

DFILE ozawa09-180\_SM\_13C.als  
 COMNT 1-tetralone  
 DATIM 2016-09-21 15:54:16  
 OBNUC 13C  
 EXMOD carbon.jxp  
 OBFREQ 125.77 MHz  
 OBSFET 7.87 KHz  
 OBFIN 4.21 Hz  
 POINT 52428  
 FREQC 31446.54 Hz  
 SCANS 12  
 ACQTM 1.6672 sec  
 PD 2.0000 sec  
 FWI 3.40 usec  
 IRNUC 1H  
 CTMP 21.7 c  
 SLVNT CDCL3  
 EXREF 77.00 ppm  
 BF 0.12 Hz  
 RGAIN 60

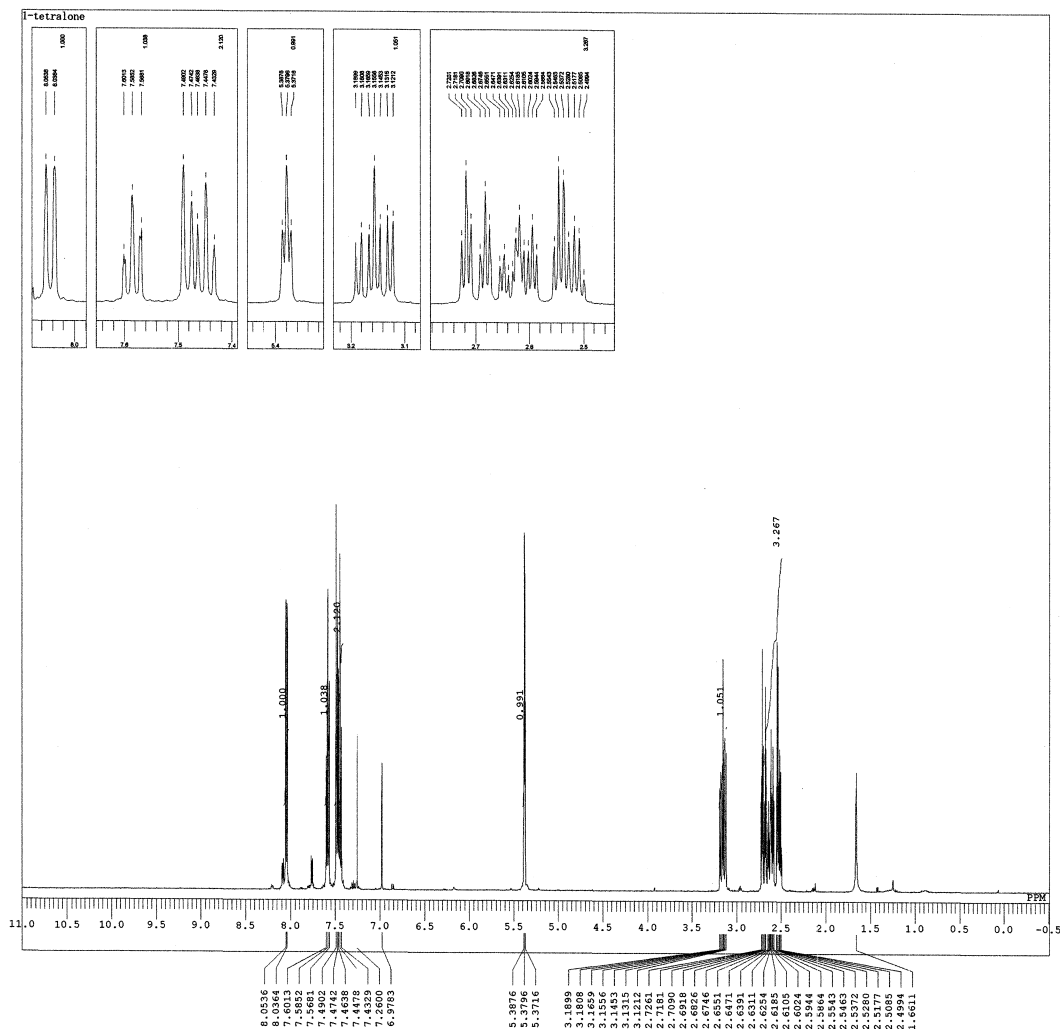

DFILE ozawa09-180\_1H.als  
 COMNT 1-tetralone  
 DATIM 2016-09-30 17:24:21  
 OBNUC 1H  
 EXMOD proton.jxp  
 OBFRQ 500.16 MHz  
 OBSET 2.41 KHz  
 OBFIN 6.01 Hz  
 POINT 13107  
 FREQU 7507.51 Hz  
 SCANS 4  
 ACQTM 1.7459 sec  
 PD 5.0000 sec  
 FW 5.55 usec  
 IRNUC 1H  
 CTMP 21.1 c  
 SLVNT CDCL3  
 EXREF 7.26 ppm  
 BF 0.12 Hz  
 RGAIN 30

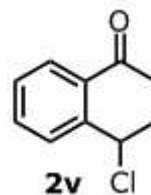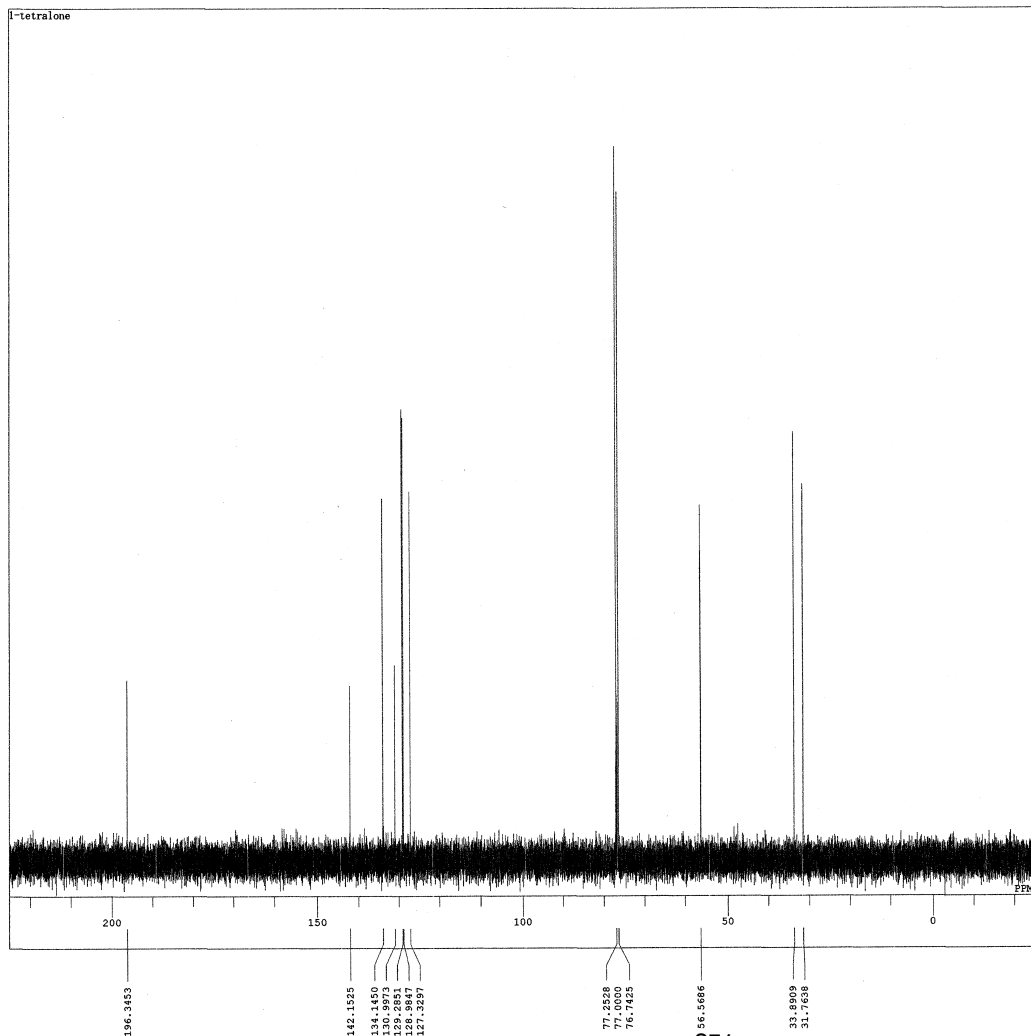

DFILE ozawa09-180\_13C.als  
 COMNT 1-tetralone  
 DATIM 2016-09-30 17:25:18  
 OBNUC 13C  
 EXMOD carbon.jxp  
 OBFRQ 125.77 MHz  
 OBSET 7.87 KHz  
 OBFIN 4.21 Hz  
 POINT 52428  
 FREQU 31446.54 Hz  
 SCANS 28  
 ACQTM 1.6672 sec  
 PD 2.0000 sec  
 FW 3.40 usec  
 IRNUC 1H  
 CTMP 21.3 c  
 SLVNT CDCL3  
 EXREF 77.00 ppm  
 BF 0.12 Hz  
 RGAIN 60



chiral, aldehyde

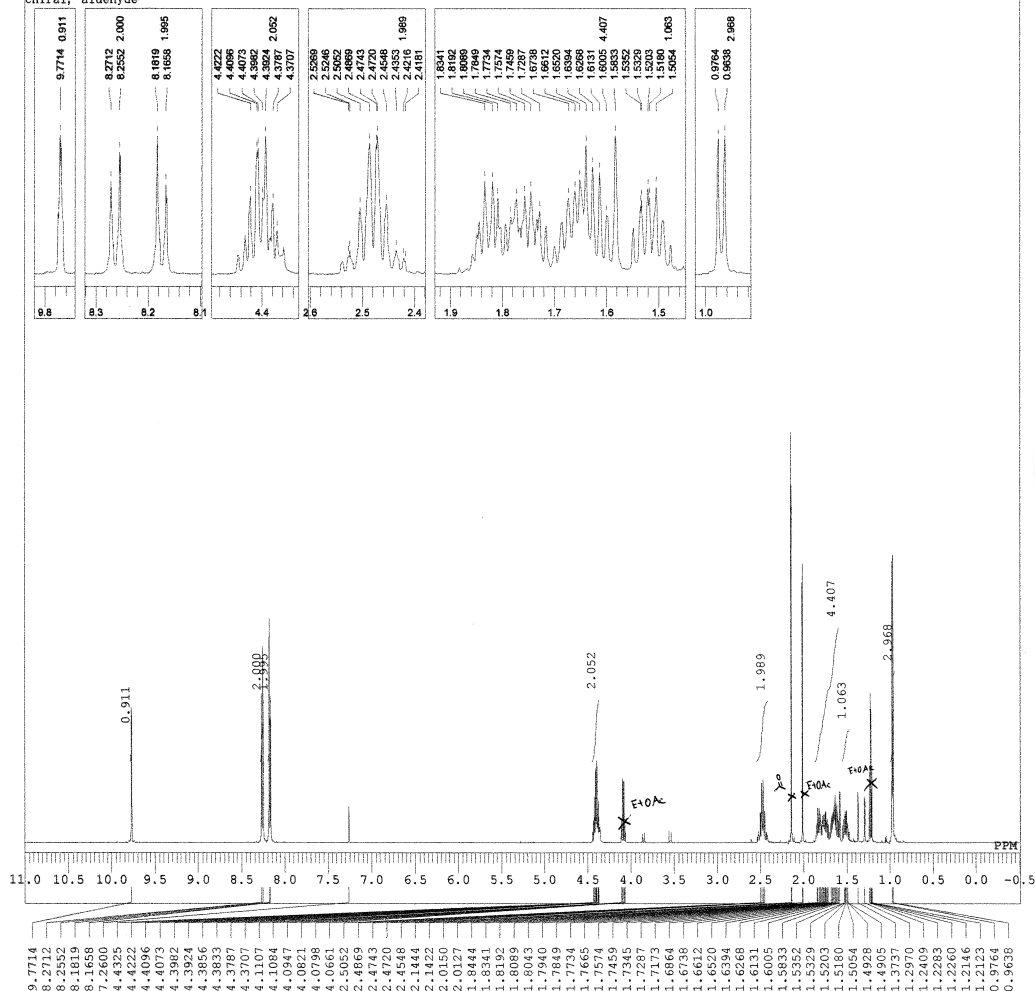

DFILE ozawa08-194\_1H.jdf  
COMNT chiral, aldehyde  
DATIM 2015-10-30 12:45:36  
1H  
OBNUC  
EXMOD proton.jxp  
OBFRQ 500.16 MHz  
OBSET 2.41 KHz  
OBFIN 6.01 Hz  
POINT 16384  
FREQU 9384.38 Hz  
SCANS 4  
ACQTM 1.7459 sec  
PD 5.0000 sec  
PW1 5.55 usec  
IRNUC 1H  
CTEMP 28.3 c  
SLVNT CDCL3  
EXREF 7.26 ppm  
BF 0.12 Hz  
RGAIN 24

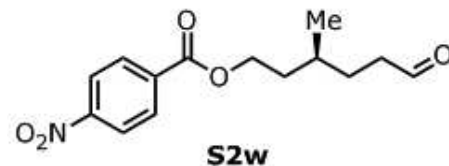

chiral, aldehyde

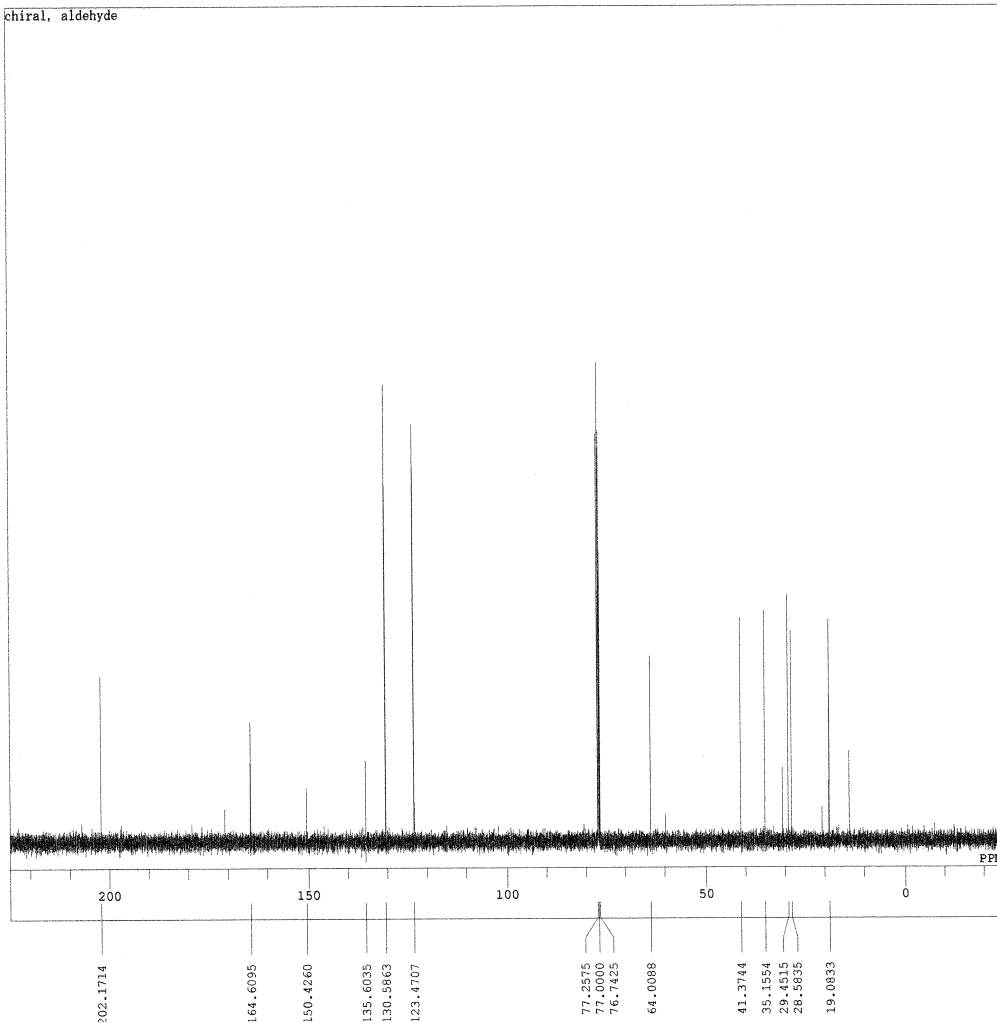

DFILE ozawa08-194\_13C.jdf  
COMNT chiral, aldehyde  
DATIM 2015-10-30 12:47:19  
13C  
OBNUC  
EXMOD carbon.jxp  
OBFRQ 125.77 MHz  
OBSET 7.87 KHz  
OBFIN 4.21 Hz  
POINT 32767  
FREQU 39308.18 Hz  
SCANS 16  
ACQTM 0.8336 sec  
PD 10.0000 sec  
PW1 3.40 usec  
IRNUC 1H  
CTEMP 28.2 c  
SLVNT CDCL3  
EXREF 77.00 ppm  
BF 0.12 Hz  
RGAIN 60



Chemical shift (PPM): 11.0, 10.0, 9.0, 8.0, 7.0, 6.0, 5.0, 4.0, 3.0, 2.0, 1.0, 0.0

Integration values: 1.00, 1.00, 2.00, 2.00, 5.07, 2.04

Chemical shift ranges (PPM): 8.2864-8.1764, 4.4718-4.3301, 2.4844-2.3379, 1.8820-1.6497, 0.9497-0.8807

CC(C(=O)O)CC[C@H](C)COOC(=O)c1ccc([N+](=O)[O-])cc1

**1w**

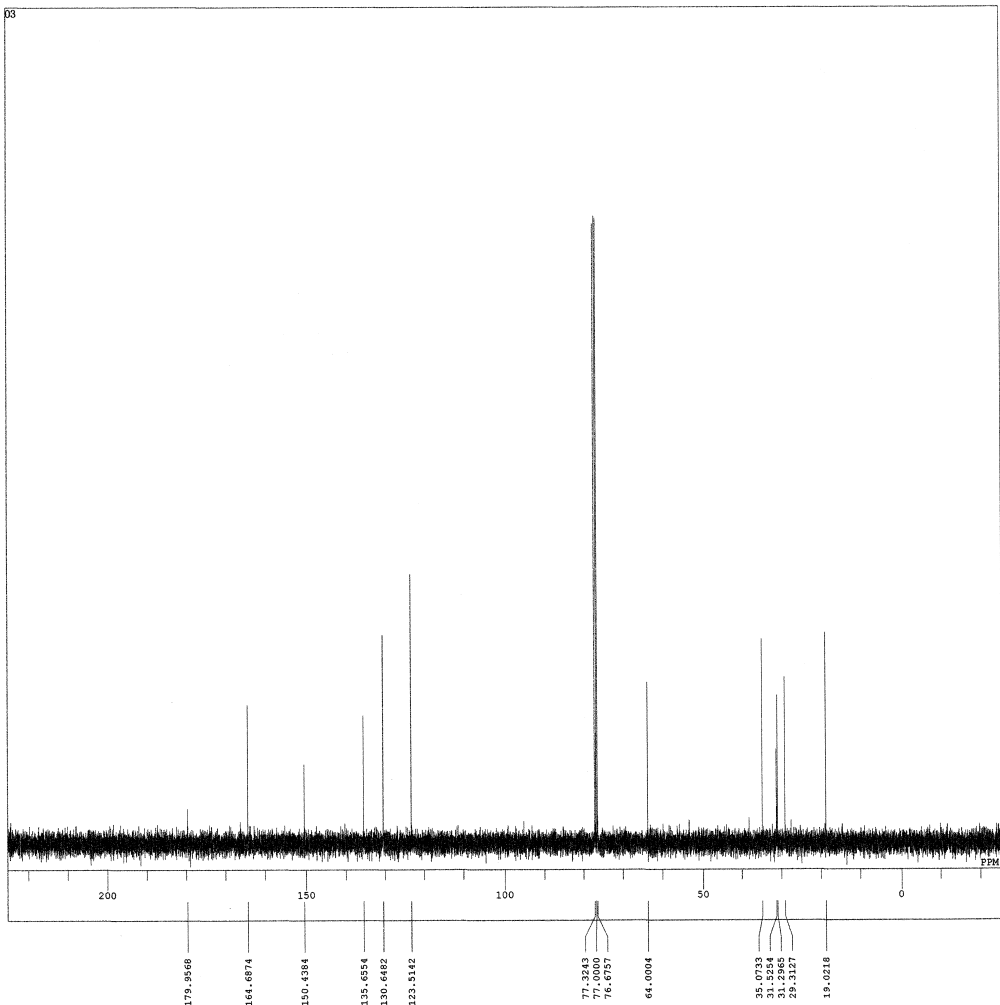

```

DFILE      ozawa09-194_MP_13C.jdf
CQM07      03
DATIM      31-10-2015 10:20:05
OBNUC      13C
EXMOD      carbon.jxp
OBFRQ      98.52 MHz
OBSET      4.64 KHz
OBFIN      8.74 Hz
POINT      32767
FREQU      30786.18 Hz
SCANS      28
ACQTM      1.0643 sec
PD         10.0000 sec
FW1        3.16 usec
IRNUC      1H
CTEMP      20.3 c
SLVNT      CDCL3
XREFP      77.00 ppm
BF         0.12 Hz
RGAIN      60

```

PTLC, chiral CO2H, Cl

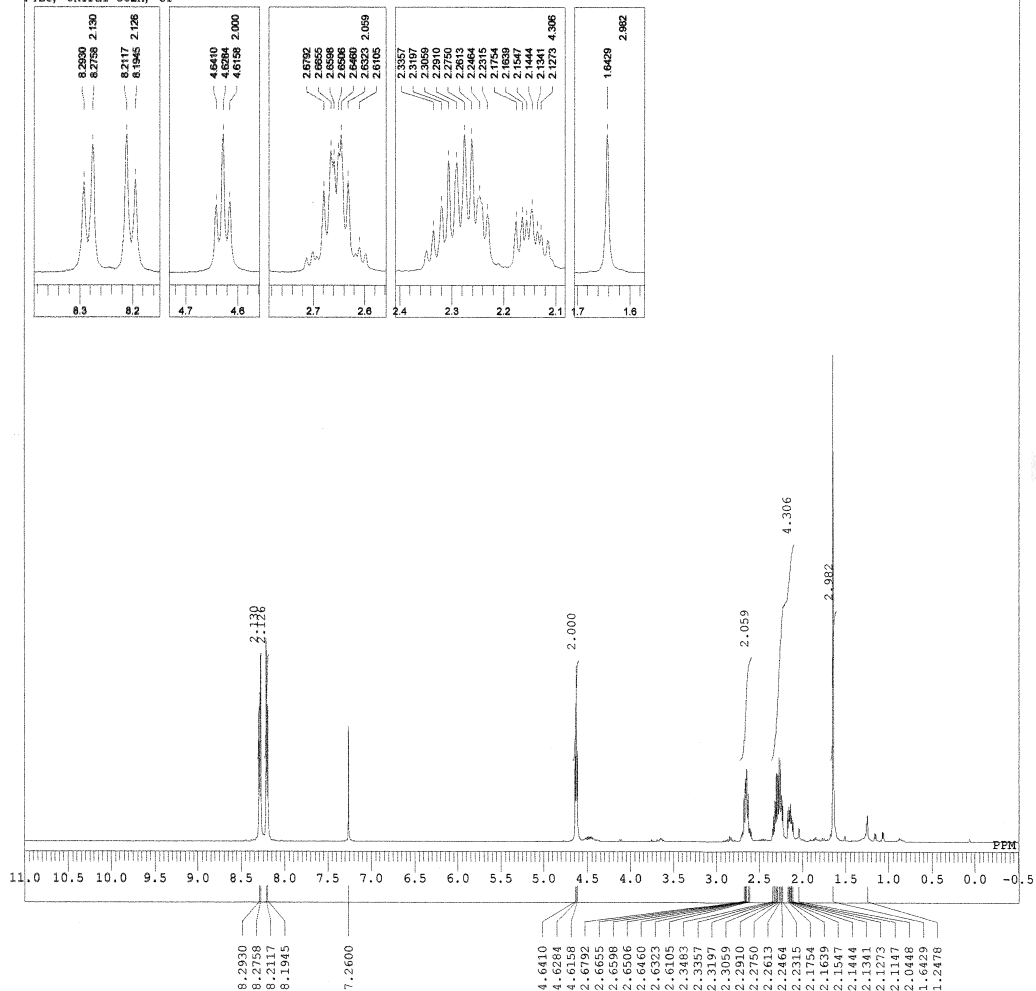

DFILE ozawa08-179 1H.jdf  
 COMMT PTLC, chiral CO2H, Cl  
 DATIM 2015-11-03 14:56:14  
 OBNUC 1H  
 EXMOD proton.jxp  
 OBFREQ 500.16 MHz  
 OBSSET 2.41 KHz  
 OBFIN 6.01 Hz  
 POINT 16384  
 FREQU 9384.38 Hz  
 SCANS 8  
 ACQTM 1.7459 sec  
 PD 5.0000 sec  
 PW1 5.55 usec  
 IRNUC 1H  
 CTEMP 25.6 c  
 SLVNT CDCL3  
 EXREF 7.26 ppm  
 BF 1.20 Hz  
 RGAIN 28

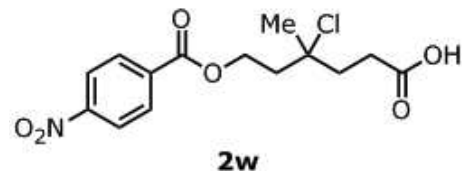

chiral CO2H, Cl

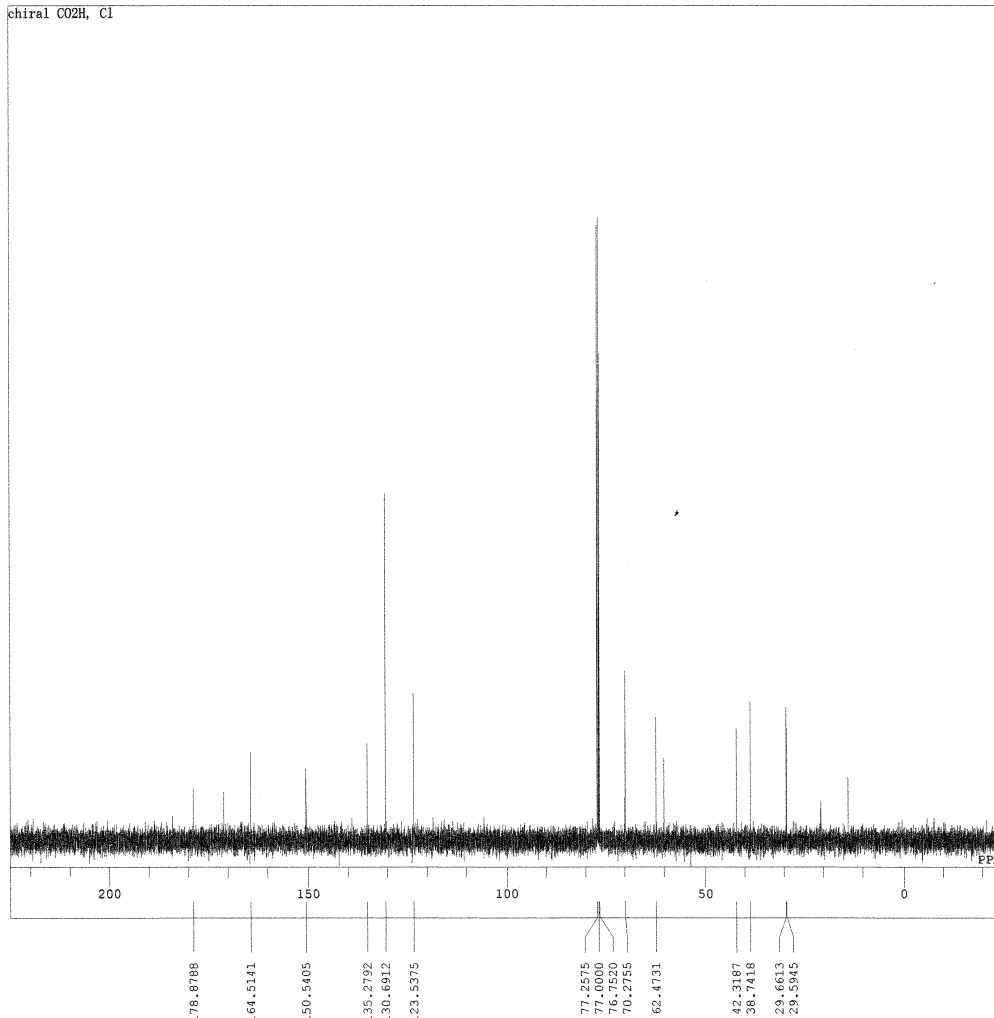

DFILE ozawa08-196 13C.jdf  
 COMMT chiral CO2H, Cl  
 DATIM 2015-11-03 15:46:15  
 OBNUC 13C  
 EXMOD carbon.jxp  
 OBFREQ 125.77 MHz  
 OBSSET 7.87 KHz  
 OBFIN 4.21 Hz  
 POINT 32767  
 FREQU 39308.18 Hz  
 SCANS 16  
 ACQTM 0.8336 sec  
 PD 10.0000 sec  
 PW1 3.40 usec  
 IRNUC 1H  
 CTEMP 28.5 c  
 SLVNT CDCL3  
 EXREF 77.00 ppm  
 BF 0.12 Hz  
 RGAIN 60

chiral, CO2Me

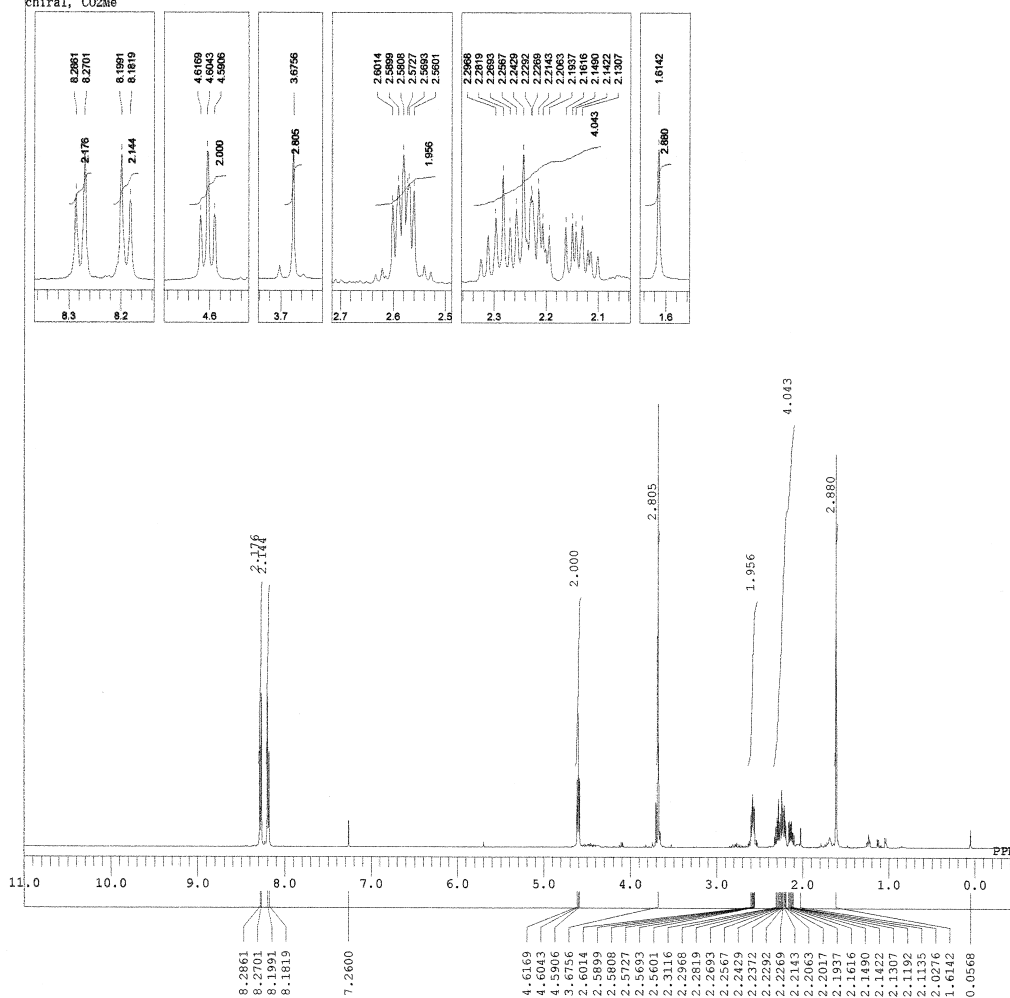

DFILE ozawa08-183 1H.jdf  
 COMMT chiral, CO2Me  
 DATIM 2015-10-27 16:41:26  
 OBNUC 1H  
 EXMOD proton.jxp  
 OBFRQ 500.16 MHz  
 OBSET 2.41 KHz  
 OBFIN 6.01 Hz  
 POINT 16384  
 FREQU 9384.38 Hz  
 SCANS 4  
 ACQTM 1.7459 sec  
 PD 5.0000 sec  
 PW1 5.55 usec  
 IRNUC 1H  
 CTMP 31.2 c  
 SLVNT CDCL3  
 EXREF 7.26 ppm  
 BF 0.12 Hz  
 RGAIN 26

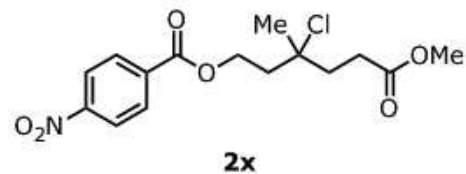

chiral CO2Me

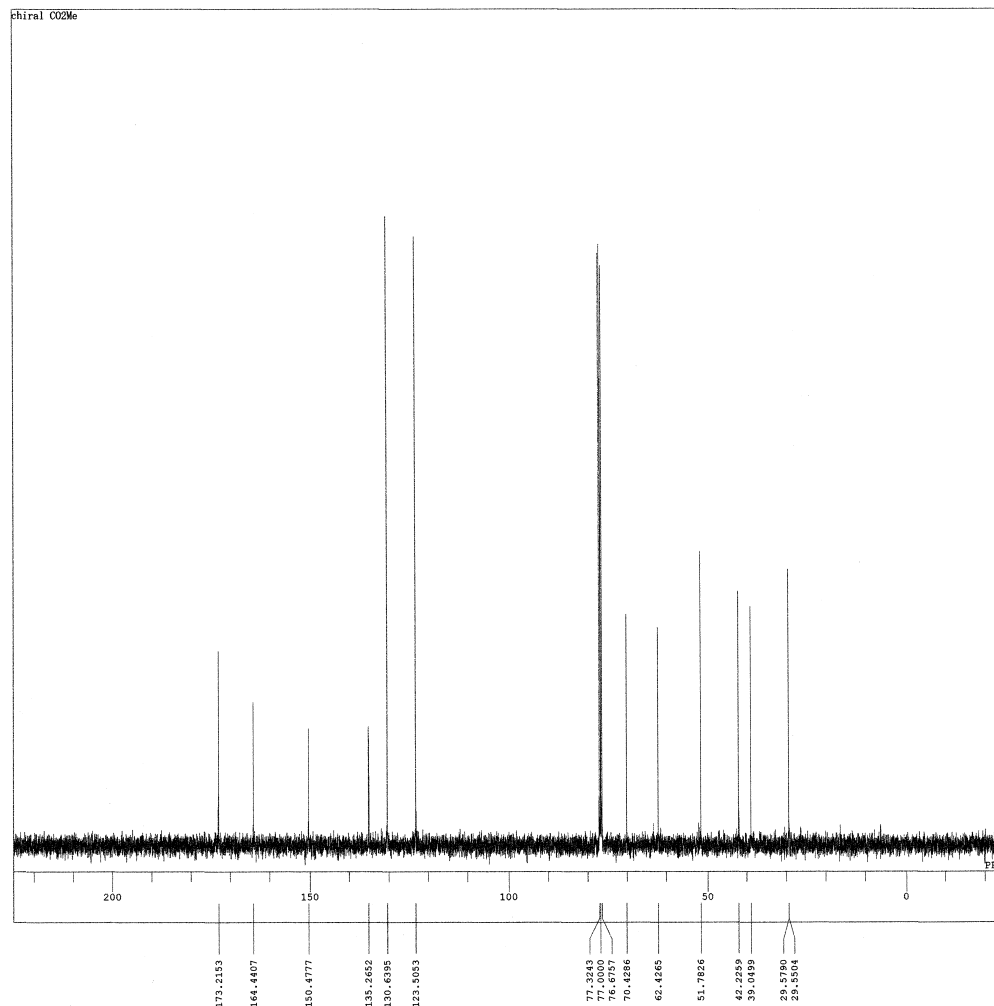

DFILE ozawa08-183 13C.als  
 COMMT chiral CO2Me  
 DATIM 24-10-2015 12:47:39  
 OBNUC 13C  
 EXMOD carbon.jxp  
 OBFRQ 99.52 MHz  
 OBSET 4.64 KHz  
 OBFIN 8.74 Hz  
 POINT 26214  
 FREQU 24630.54 Hz  
 SCANS 16  
 ACQTM 1.0643 sec  
 PD 10.0000 sec  
 PW1 3.16 usec  
 IRNUC 1H  
 CTMP 20.5 c  
 SLVNT CDCL3  
 EXREF 77.00 ppm  
 BF 1.20 Hz  
 RGAIN 60
